# Supplementary material for: Growth hormone ameliorates the age-associated depletion of ovarian reserve and decline of oocyte quality via inhibiting the activation of Fos and Jun signaling
Source: Aging (Albany NY). 2021 Feb 17;13(5):6765–81. doi: 10.18632/aging.202534 (PMC7993724; doi:10.18632/aging.202534)
Supplement: Supplementary Table 1 [file aging-13-202534-s002.xlsx]

## Sheet: 文件说明
Supplementary Table 1. Genes differently expressed in NS-treated and GH-treated oocytes.
列头	列头含义
Gene_id	基因在Eesembl数据库的编号
Gene_Symbol	基因名称,与NCBI GenBank的基因标识一致
Chr	该基因所在染色体名称
Start	该基因在染色体上的起始位点
End	该基因在染色体上的终止位点
Strand	该基因所在染色体所属的链的属性。'+'表示正链,'-'表示负链
Length	该基因的长度
log2FoldChange	log2的差异倍数。本次取值大于2倍或者小于0.5倍。
pvalue	p值，用来表示差异基因的显著性水平，本次取p值小于0.05。
padj	p 值校正值 FDR，即对相同条件下的试验的差异显著性进行多重检验校正。

## Sheet: 差异基因的结果
Supplementary Table 1. Genes differently expressed in NS-treated and GH-treated oocytes.
Gene_id	Gene_Symbol	Chr	Start	End	Strand	Length	log2FoldChange	pvalue	padj	GH1_expression	GH2_expression	GH3_expression	GH4_expression	NS1_expression	NS2_expression	NS3_expression	NS4_expression	GH1	GH2	GH3	GH4	NS1	NS2	NS3	NS4	style
ENSMUSG00000000915.15	Hip1r	5	123973628	124005558	+	31931	1.16896	0.00710751	0.322596	844.495	864.761	1781.21	448.825	311.159	475.592	442.735	521.512	1327	651	1314	434	242	381	1027	482	up
ENSMUSG00000001497.18	Pax9	12	56691767	56712822	+	21056	6.7721	0.0456146	0.763358	0	49.1492	25.7557	0	0	0	0	0	0	37	19	0	0	0	0	0	up
ENSMUSG00000001739.14	Cldn15	5	136966616	136975858	+	9243	1.04588	0.0176908	0.533144	2415.12	2040.36	6463.32	7644.5	2414.69	1871.16	2472.33	2232.11	3795	1536	4768	7392	1878	1499	5735	2063	up
ENSMUSG00000001930.17	Vwf	6	125546774	125686679	+	139906	1.71117	0.0216656	0.587927	132.37	126.194	81.3338	78.596	6.4289	73.648	25.4346	22.7215	208	95	60	76	5	59	59	21	up
ENSMUSG00000007122.11	Casq1	1	172209894	172219868	-	9975	21.1299	4.39662e-10	1.35083e-07	103.096	0	0	0	0	0	0	0	162	0	0	0	0	0	0	0	up
ENSMUSG00000007476.18	Lrrc8a	2	30237715	30263790	+	26076	1.01651	0.0222692	0.591284	12763.5	10148.7	11515.5	9190.57	2975.29	2165.75	7455.8	8962	20056	7640	8495	8887	2314	1735	17295	8283	up
ENSMUSG00000009293.17	Ube2g2	10	77622275	77645993	+	23719	1.5708	0.00575238	0.282159	3002.51	3425.83	10013.5	3889.47	1101.91	3798.49	845.379	1099.29	4718	2579	7387	3761	857	3043	1961	1016	up
ENSMUSG00000014852.16	Adamts13	2	26973416	27009628	+	36213	6.95348	0.040092	0.7394	0	61.1045	0	23.7856	0	0	0	0	0	46	0	23	0	0	0	0	up
ENSMUSG00000020137.5	Thap2	10	115368404	115384443	-	16040	1.11242	0.00333087	0.200055	452.476	727.94	307.713	319.555	190.295	259.641	218.134	167.706	711	548	227	309	148	208	506	155	up
ENSMUSG00000020346.16	Mgat1	11	49244191	49263030	+	18840	1.70242	0.0234797	0.604482	768.764	1368.21	214.179	745.628	68.1463	127.324	125.449	630.791	1208	1030	158	721	53	102	291	583	up
ENSMUSG00000020875.9	Hoxb9	11	96271457	96276595	+	5139	7.54988	0.0257641	0.636425	125.37	0	2.71113	0	0	0	0	0	197	0	2	0	0	0	0	0	up
ENSMUSG00000020963.15	Tshr	12	91384563	91549808	+	165246	7.93507	2.25016e-07	4.00714e-05	42.002	70.403	36.6002	18.6149	0	0	0	0	66	53	27	18	0	0	0	0	up
ENSMUSG00000021087.18	Rtn1	12	72211752	72409054	-	197303	1.4856	0.0338532	0.708491	213.192	155.418	75.9115	39.298	19.2867	48.6826	69.4064	34.6232	335	117	56	38	15	39	161	32	up
ENSMUSG00000021135.8	Slc10a1	12	80953183	80968705	-	15523	20.4461	1.60259e-09	3.20048e-07	63.003	0	0	0	0	0	0	0	99	0	0	0	0	0	0	0	up
ENSMUSG00000021239.12	Vsx2	12	84569762	84595457	+	25696	1.61645	0.000397785	0.0404424	421.293	515.403	919.072	337.136	213.439	142.303	256.933	100.624	662	388	678	326	166	114	596	93	up
ENSMUSG00000021277.16	Traf3	12	111166370	111267153	+	100784	1.05819	0.0397427	0.737857	1590.99	668.164	478.514	485.02	453.88	606.66	254.778	234.789	2500	503	353	469	353	486	591	217	up
ENSMUSG00000021318.15	Gli3	13	15463235	15730026	+	266792	1.89752	0.00546335	0.273399	19506.1	15156.6	4909.85	11772.9	1724.23	7035.26	4540.3	481.479	30651	11410	3622	11384	1341	5636	10532	445	up
ENSMUSG00000021337.8	Scgn	13	23953456	23991214	-	37759	7.3495	0.00396671	0.220452	0	73.0597	14.9112	23.7856	0	0	0	0	0	55	11	23	0	0	0	0	up
ENSMUSG00000021536.7	Adcy2	13	68620043	68999541	-	379499	20.8415	7.61646e-10	1.80465e-07	0	0	84.0449	0	0	0	0	0	0	0	62	0	0	0	0	0	up
ENSMUSG00000021596.16	Mctp1	13	76384535	77031810	+	647276	1.4405	4.26559e-05	0.00593341	680.942	897.97	896.027	1414.73	248.155	414.426	278.919	492.299	1070	676	661	1368	193	332	647	455	up
ENSMUSG00000021613.9	Hapln1	13	89539796	89611652	+	71857	20.9841	5.80766e-10	1.50348e-07	92.9136	0	0	0	0	0	0	0	146	0	0	0	0	0	0	0	up
ENSMUSG00000021679.4	S100z	13	95477268	95478721	-	1454	6.57904	0.0215642	0.587927	0	45.1642	16.2668	4.13663	0	0	0	0	0	34	12	4	0	0	0	0	up
ENSMUSG00000022103.9	Gfra2	14	70890130	70979838	+	89709	6.88669	0.00717098	0.323757	17.819	0	35.2446	27.9223	0	0	0	0	28	0	26	27	0	0	0	0	up
ENSMUSG00000022816.11	Fstl1	16	37776873	37836514	+	59642	1.39622	0.0110625	0.412033	1250.51	871.403	772.671	946.255	297.015	757.701	310.389	95.2138	1965	656	570	915	231	607	720	88	up
ENSMUSG00000023266.11	Frs3	17	47689030	47704286	+	15257	6.91085	0.0067268	0.310867	20.3646	0	25.7557	36.1955	0	0	0	0	32	0	19	35	0	0	0	0	up
ENSMUSG00000023963.9	Cyp39a1	17	43667425	43751431	+	84007	1.23244	0.00443849	0.236824	1480.89	3226.58	5462.92	5046.69	2350.4	1647.72	1059.63	1419.55	2327	2429	4030	4880	1828	1320	2458	1312	up
ENSMUSG00000024109.18	Nrxn1	17	90033631	91093071	-	1059441	5.19502	0.026359	0.641437	66.8214	126.194	0	0	0	0	3.87986	1.08197	105	95	0	0	0	0	9	1	up
ENSMUSG00000024136.14	Dnase1l2	17	24440081	24443105	-	3025	20.3901	1.77942e-09	3.52844e-07	60.4574	0	0	0	0	0	0	0	95	0	0	0	0	0	0	0	up
ENSMUSG00000024210.2	Ip6k3	17	27143969	27167764	-	23796	6.7291	0.0470143	0.771027	0	38.5224	0	34.1272	0	0	0	0	0	29	0	33	0	0	0	0	up
ENSMUSG00000024247.14	Pkdcc	17	83215292	83225070	+	9779	21.1887	3.9284e-10	1.29217e-07	107.551	0	0	0	0	0	0	0	169	0	0	0	0	0	0	0	up
ENSMUSG00000024302.16	Dtna	18	23415135	23659715	+	244581	1.01181	0.00578402	0.283214	1498.07	672.149	1541.28	2195.52	813.898	712.763	814.34	588.594	2354	506	1137	2123	633	571	1889	544	up
ENSMUSG00000024519.5	Cplx4	18	65955727	65970178	-	14452	20.8811	7.06355e-10	1.71776e-07	86.5496	0	0	0	0	0	0	0	136	0	0	0	0	0	0	0	up
ENSMUSG00000024681.11	Ms4a3	19	11629496	11640851	-	11356	20.9936	5.70412e-10	1.50348e-07	93.5499	0	0	0	0	0	0	0	147	0	0	0	0	0	0	0	up
ENSMUSG00000024831.13	Ighmbp2	19	3260924	3283017	-	22094	1.17335	0.0312663	0.68295	203.01	201.91	786.227	344.375	230.154	98.6135	177.18	174.198	319	152	580	333	179	79	411	161	up
ENSMUSG00000024862.16	Klc2	19	5107746	5118560	-	10815	1.11311	0.00580369	0.283611	91.0044	115.567	86.756	68.2545	34.716	43.6895	48.7138	38.9511	143	87	64	66	27	35	113	36	up
ENSMUSG00000024935.10	Slc1a1	19	28835049	28913960	+	78912	1.71937	0.00176174	0.130308	185.827	162.06	479.869	134.441	111.863	56.1722	54.3181	70.3284	292	122	354	130	87	45	126	65	up
ENSMUSG00000025323.10	Sp4	12	118234933	118301440	-	66508	1.03688	0.012811	0.446556	80.1857	89	116.578	82.7327	50.1454	29.9585	54.7491	43.279	126	67	86	80	39	24	127	40	up
ENSMUSG00000025870.10	Arl10	13	54575015	54581128	+	6114	1.68332	0.00149063	0.114811	117.097	282.94	408.024	214.071	79.7183	46.1861	126.311	63.8365	184	213	301	207	62	37	293	59	up
ENSMUSG00000026393.10	Nek7	1	138482875	138620141	-	137267	1.06796	0.00775871	0.341078	2985.96	4659.88	3796.93	4253.49	1451.64	3601.26	1266.13	1169.61	4692	3508	2801	4113	1129	2885	2937	1081	up
ENSMUSG00000026415.11	Fcamr	1	130800902	130814740	+	13839	7.51646	0.020902	0.579188	31.8197	0	93.5339	0	0	0	0	0	50	0	69	0	0	0	0	0	up
ENSMUSG00000026483.13	Fam129a	1	151571186	151721939	+	150754	1.93966	0.0170481	0.525749	775.765	51.806	131.49	198.558	27.0014	88.6273	95.2721	90.8859	1219	39	97	192	21	71	221	84	up
ENSMUSG00000026586.16	Prrx1	1	163245119	163313710	-	68592	2.22113	0.0423865	0.749579	56.0027	50.4776	59.6448	32.0589	10.2862	4.99309	26.2968	0	88	38	44	31	8	4	61	0	up
ENSMUSG00000026827.12	Gpd2	2	57237635	57370719	+	133085	1.99945	0.000438949	0.0435198	3224.61	1129.1	845.871	4299	433.308	349.516	546.629	1046.27	5067	850	624	4157	337	280	1268	967	up
ENSMUSG00000026893.4	Gca	2	62664285	62694109	+	29825	2.19761	0.00869643	0.361894	530.116	341.388	498.847	1906.99	159.437	12.4827	387.555	153.64	833	257	368	1844	124	10	899	142	up
ENSMUSG00000027246.12	Ell3	2	121439010	121444278	-	5269	1.00377	0.0150867	0.49367	212.556	167.373	275.179	182.012	115.72	158.531	74.5795	70.3284	334	126	203	176	90	127	173	65	up
ENSMUSG00000027355.15	Tmco5	2	116878691	116892494	+	13804	6.85444	0.00893881	0.366452	49.0024	0	17.6223	12.4099	0	0	0	0	77	0	13	12	0	0	0	0	up
ENSMUSG00000027765.6	P2ry1	3	61002795	61008982	+	6188	2.62226	0.0300117	0.67499	101.823	55.791	323.98	202.695	21.8582	4.99309	83.2015	0	160	42	239	196	17	4	193	0	up
ENSMUSG00000027863.8	Cd2	3	101275899	101287939	-	12041	21.0607	5.01862e-10	1.4109e-07	0	98.2985	0	0	0	0	0	0	0	74	0	0	0	0	0	0	up
ENSMUSG00000027896.15	Slc16a4	3	107291230	107312115	+	20886	2.38917	0.0412038	0.740922	178.827	54.4627	52.867	332.999	0	8.7379	38.7986	70.3284	281	41	39	322	0	7	90	65	up
ENSMUSG00000027954.9	Efna1	3	89271733	89281142	-	9410	1.23868	4.82444e-05	0.00667755	5050.42	5620.28	7206.17	6375.59	1900.38	3993.22	2598.21	1785.26	7936	4231	5316	6165	1478	3199	6027	1650	up
ENSMUSG00000027996.13	Sfrp2	3	83766321	83774316	+	7996	5.47	0.0477781	0.771747	1601.17	0	0	13.4441	10.2862	0	5.60424	20.5575	2516	0	0	13	8	0	13	19	up
ENSMUSG00000028020.16	Glrb	3	80843599	80913660	-	70062	2.58679	0.0445848	0.761181	102.459	25.2388	119.29	528.455	10.2862	0	100.445	17.3116	161	19	88	511	8	0	233	16	up
ENSMUSG00000028386.1	Slc46a2	4	59905126	59915056	-	9931	6.62482	0.0131656	0.455566	35.6381	0	16.2668	15.5124	0	0	0	0	56	0	12	15	0	0	0	0	up
ENSMUSG00000028444.17	Cntfr	4	41657498	41697089	-	39592	21.2364	3.58409e-10	1.25863e-07	0	111.582	0	0	0	0	0	0	0	84	0	0	0	0	0	0	up
ENSMUSG00000029272.8	Sult1e1	5	87575969	87591594	-	15626	4.08482	0.011503	0.421512	172.463	81.0298	155.89	37.2297	0	0	25.4346	0	271	61	115	36	0	0	59	0	up
ENSMUSG00000029597.14	Sds	5	120476526	120483932	+	7407	1.1794	0.0248083	0.623963	121.551	220.507	326.691	341.272	171.009	109.848	49.576	116.853	191	166	241	330	133	88	115	108	up
ENSMUSG00000029697.6	Fezf1	6	23245044	23248362	-	3319	7.04196	0.00614563	0.294897	55.3663	0	10.8445	23.7856	0	0	0	0	87	0	8	23	0	0	0	0	up
ENSMUSG00000030257.16	Srgap3	6	112717971	112947266	-	229296	7.28538	0.0314527	0.684347	102.459	0	0	4.13663	0	0	0	0	161	0	0	4	0	0	0	0	up
ENSMUSG00000030317.8	Timp4	6	115241892	115252205	-	10314	21.0243	5.24783e-10	1.43847e-07	245.012	0	0	0	0	0	0	0	385	0	0	0	0	0	0	0	up
ENSMUSG00000030804.8	Gm21974	7	127886227	127895454	-	9228	20.6156	1.16645e-09	2.54787e-07	71.2761	0	0	0	0	0	0	0	112	0	0	0	0	0	0	0	up
ENSMUSG00000030963.6	Umod	7	119462711	119479282	-	16572	6.93201	0.0407143	0.740452	0	0	29.8224	53.7762	0	0	0	0	0	0	22	52	0	0	0	0	up
ENSMUSG00000031200.16	Mtcp1	X	75410444	75416588	-	6145	1.05055	0.0186245	0.546402	241.83	147.448	165.379	97.2109	83.5756	76.1446	102.601	51.9348	380	111	122	94	65	61	238	48	up
ENSMUSG00000031212.3	Pgr15l	X	97072596	97082104	+	9509	20.5541	1.30937e-09	2.81605e-07	68.0942	0	0	0	0	0	0	0	107	0	0	0	0	0	0	0	up
ENSMUSG00000031595.9	Pdgfrl	8	40926212	40990785	+	64574	21.2236	3.64637e-10	1.25863e-07	138.734	0	0	0	0	0	0	0	218	0	0	0	0	0	0	0	up
ENSMUSG00000031618.13	Nr3c2	8	76899442	77245012	+	345571	6.84301	0.0433831	0.753678	0	63.7612	14.9112	0	0	0	0	0	0	48	11	0	0	0	0	0	up
ENSMUSG00000032135.15	Mcam	9	44134469	44142727	+	8259	21.1795	3.99823e-10	1.29984e-07	106.914	0	0	0	0	0	0	0	168	0	0	0	0	0	0	0	up
ENSMUSG00000032380.8	Dapk2	9	66158223	66272242	+	114020	1.10679	0.00134199	0.106035	1113.05	1255.3	1630.74	1488.15	660.89	1016.09	476.792	396.003	1749	945	1203	1439	514	814	1106	366	up
ENSMUSG00000032420.8	Nt5e	9	88327197	88372092	+	44896	1.57271	0.0457097	0.763358	1179.24	92.9851	374.135	178.909	122.149	121.082	302.629	67.0824	1853	70	276	173	95	97	702	62	up
ENSMUSG00000032517.16	Mobp	9	120149707	120181484	+	31778	21.139	4.31246e-10	1.35083e-07	109.46	0	0	0	0	0	0	0	172	0	0	0	0	0	0	0	up
ENSMUSG00000032537.15	Ephb1	9	101922128	102354693	-	432566	1.09532	0.0297241	0.67499	203.01	175.343	555.781	459.166	235.298	132.317	178.043	106.034	319	132	410	444	183	106	413	98	up
ENSMUSG00000032584.12	Mst1r	9	107906873	107920383	+	13511	20.6401	1.11377e-09	2.45196e-07	72.5489	0	0	0	0	0	0	0	114	0	0	0	0	0	0	0	up
ENSMUSG00000032714.6	Syde1	10	78584503	78591964	-	7462	1.10114	0.00297338	0.18649	1681.99	899.298	1426.05	1257.54	605.602	303.33	669.492	875.318	2643	677	1052	1216	471	243	1553	809	up
ENSMUSG00000033510.14	Otud7a	7	63444751	63759028	+	314278	3.43353	0.0111269	0.413678	69.367	7.97015	104.378	5.17079	0	2.49654	3.87986	10.8197	109	6	77	5	0	2	9	10	up
ENSMUSG00000033520.2	Idi2	13	8952863	8960945	+	8083	21.0866	4.77665e-10	1.40579e-07	99.9139	0	0	0	0	0	0	0	157	0	0	0	0	0	0	0	up
ENSMUSG00000034071.15	Zfp551	7	12415153	12422751	-	7599	1.66541	0.0113606	0.418468	66.8214	104.94	177.579	235.788	25.7156	19.9724	77.5972	59.5086	105	79	131	228	20	16	180	55	up
ENSMUSG00000034673.14	Pbx2	17	34591266	34597400	+	6135	1.52332	0.0378286	0.732445	1302.06	217.851	164.023	132.372	138.864	190.986	162.092	140.657	2046	164	121	128	108	153	376	130	up
ENSMUSG00000034936.2	Arl4d	11	101665541	101667832	+	2292	1.01177	0.0349243	0.717737	308.651	773.104	1047.85	340.238	192.867	292.096	380.657	357.052	485	582	773	329	150	234	883	330	up
ENSMUSG00000035382.9	Pcsk7	9	45906497	45929726	+	23230	1.20024	0.0092836	0.374439	117.097	349.358	296.868	387.809	141.436	157.282	89.2368	113.607	184	263	219	375	110	126	207	105	up
ENSMUSG00000035638.14	Muc20	16	32777419	32797435	-	20017	1.16857	0.000376918	0.0388866	6649.68	5102.22	4282.22	6922.66	3631.04	1371.85	2496.04	2714.68	10449	3841	3159	6694	2824	1099	5790	2509	up
ENSMUSG00000035852.11	Misp	10	79820989	79830490	+	9502	20.8709	7.20078e-10	1.72074e-07	0	86.3433	0	0	0	0	0	0	0	65	0	0	0	0	0	0	up
ENSMUSG00000036585.15	Fgf1	18	38838673	38929404	-	90732	1.18021	0.00813905	0.350092	542.844	543.298	366.002	389.878	189.01	335.785	204.339	84.394	853	409	270	377	147	269	474	78	up
ENSMUSG00000036816.4	Atoh7	10	63099651	63101279	+	1629	7.16499	0.00494466	0.253665	57.2755	0	32.5335	8.27327	0	0	0	0	90	0	24	8	0	0	0	0	up
ENSMUSG00000036863.12	Syde2	3	145987870	146021720	+	33851	1.96279	0.0421926	0.749127	136.188	166.045	73.2004	101.348	41.1449	0	43.9718	36.7871	214	125	54	98	32	0	102	34	up
ENSMUSG00000037202.6	Prf1	10	61297833	61304680	+	6848	6.71378	0.0475216	0.771747	0	49.1492	0	22.7515	0	0	0	0	0	37	0	22	0	0	0	0	up
ENSMUSG00000037548.14	H2-DMb2	17	34143307	34151553	+	8247	22.8142	1.56601e-11	1.45947e-08	0	476.88	0	0	0	0	0	0	0	359	0	0	0	0	0	0	up
ENSMUSG00000038042.10	Ptpdc1	13	48577872	48625664	-	47793	1.25446	0.0131092	0.454177	512.297	680.119	427.002	262.676	195.438	240.916	283.23	68.1644	805	512	315	254	152	193	657	63	up
ENSMUSG00000038319.14	Kcnh2	5	24319589	24351604	-	32016	1.9459	0.00201022	0.142288	110.096	170.03	317.202	162.363	77.1467	71.1515	34.4877	15.1476	173	128	234	157	60	57	80	14	up
ENSMUSG00000038521.17	C1s1	6	124530345	124542359	-	12015	7.94818	0.0106953	0.409071	133.643	0	35.2446	0	0	0	0	0	210	0	26	0	0	0	0	0	up
ENSMUSG00000038570.15	Saxo2	7	82632960	82648528	-	15569	1.57956	0.0152577	0.496613	255.194	213.866	905.516	560.514	248.155	82.3859	255.209	60.5906	401	161	668	542	193	66	592	56	up
ENSMUSG00000038576.15	Susd4	1	182763860	182896591	+	132732	1.7233	0.00251861	0.163763	487.478	104.94	398.536	269.915	68.1463	52.4274	128.467	132.001	766	79	294	261	53	42	298	122	up
ENSMUSG00000038608.15	Dock10	1	80501073	80758527	-	257455	1.02677	0.00146456	0.113428	523.752	415.776	380.913	416.766	210.868	250.903	264.693	125.509	823	313	281	403	164	201	614	116	up
ENSMUSG00000039315.15	Clnk	5	38706462	38876812	-	170351	20.4461	1.60259e-09	3.20048e-07	63.003	0	0	0	0	0	0	0	99	0	0	0	0	0	0	0	up
ENSMUSG00000039601.15	Rcan2	17	43801851	44039516	+	237666	20.1784	2.52918e-09	4.87679e-07	0	132.836	0	0	0	0	0	0	0	100	0	0	0	0	0	0	up
ENSMUSG00000039683.16	Sdk1	5	141241490	142215586	+	974097	1.03234	0.0307919	0.679552	323.288	185.97	173.512	157.192	56.5743	103.607	83.6326	167.706	508	140	128	152	44	83	194	155	up
ENSMUSG00000039835.16	Nhsl1	10	18318985	18533892	+	214908	1.10064	0.0111781	0.413933	3924.64	4055.48	1316.25	1534.69	1581.51	1368.11	837.188	1265.91	6167	3053	971	1484	1230	1096	1942	1170	up
ENSMUSG00000039997.16	Ifi203	1	173920407	173942672	-	22266	21.0639	4.98628e-10	1.4109e-07	0	99.6268	0	0	0	0	0	0	0	75	0	0	0	0	0	0	up
ENSMUSG00000040055.9	Gjb6	14	57123303	57133611	-	10309	8.16133	0.00055545	0.0528225	0	115.567	65.067	15.5124	0	0	0	0	0	87	48	15	0	0	0	0	up
ENSMUSG00000040522.5	Tlr8	X	167242696	167264329	-	21634	4.53443	0.00473819	0.246236	93.5499	143.463	214.179	164.431	27.0014	0	0	0	147	108	158	159	21	0	0	0	up
ENSMUSG00000040828.9	Catsperd	17	56628143	56664456	+	36314	2.38565	3.14753e-05	0.00448989	126.642	110.254	66.4226	186.149	30.8587	9.98618	27.5901	24.8854	199	83	49	180	24	8	64	23	up
ENSMUSG00000040998.18	Npnt	3	132881745	132950291	-	68547	1.19253	0.0175998	0.533144	162.917	216.522	146.401	124.099	25.7156	79.8894	88.8057	88.7219	256	163	108	120	20	64	206	82	up
ENSMUSG00000041544.11	Disp3	4	148240264	148287965	-	47702	21.3015	3.16242e-10	1.18843e-07	116.46	0	0	0	0	0	0	0	183	0	0	0	0	0	0	0	up
ENSMUSG00000041703.7	Zic5	14	122456795	122465677	-	8883	20.4722	1.52611e-09	3.11449e-07	64.2758	0	0	0	0	0	0	0	101	0	0	0	0	0	0	0	up
ENSMUSG00000042474.6	Fcmr	1	130865669	130880791	+	15123	21.8221	1.14796e-10	6.41918e-08	0	170.03	0	0	0	0	0	0	0	128	0	0	0	0	0	0	up
ENSMUSG00000042540.12	Acot5	12	84069325	84076020	+	6696	1.17768	0.0103394	0.402056	252.648	289.582	464.958	261.642	99.005	233.427	77.1661	152.558	397	218	343	253	77	187	179	141	up
ENSMUSG00000042671.12	Rgs8	1	153653025	153700323	+	47299	6.66051	0.0134806	0.457325	10.1823	23.9104	35.2446	0	0	0	0	0	16	18	26	0	0	0	0	0	up
ENSMUSG00000043110.2	Lrrn4	2	132868305	132880891	-	12587	1.52631	0.000189948	0.0216766	847.041	653.552	1615.83	923.504	248.155	538.005	236.672	380.855	1331	492	1192	893	193	431	549	352	up
ENSMUSG00000043230.2	Fam124b	1	80198706	80218473	-	19768	1.27685	8.97395e-05	0.0115623	287.65	611.045	428.358	578.095	203.153	223.441	188.389	170.952	452	460	316	559	158	179	437	158	up
ENSMUSG00000043290.6	Zfp784	7	5034439	5038446	-	4008	5.31976	0.0193731	0.561069	8.90952	39.8507	0	38.2639	0	0	1.72438	0	14	30	0	37	0	0	4	0	up
ENSMUSG00000043964.14	Orai3	7	127769815	127775150	+	5336	1.43297	0.0228175	0.594908	821.585	281.612	364.646	307.145	70.7179	59.9171	259.52	266.166	1291	212	269	297	55	48	602	246	up
ENSMUSG00000044288.6	Cnr1	4	33924593	33948831	+	24239	6.83425	0.0436537	0.753678	19.0918	0	0	58.947	0	0	0	0	30	0	0	57	0	0	0	0	up
ENSMUSG00000044461.6	Shisa2	14	59625308	59631660	+	6353	6.56322	0.00130811	0.104496	73.8217	23.9104	149.112	0	0	0	2.15548	0	116	18	110	0	0	0	5	0	up
ENSMUSG00000044647.16	Csrnp3	2	65845767	66031546	+	185780	1.60794	4.88396e-05	0.00672664	255.83	387.881	557.136	579.129	140.15	93.6204	193.131	154.722	402	292	411	560	109	75	448	143	up
ENSMUSG00000044667.12	Plppr4	3	117319139	117360876	-	41738	6.78773	0.0451144	0.76291	0	75.7164	0	0	0	0	0	0	0	57	0	0	0	0	0	0	up
ENSMUSG00000044674.6	Fzd1	5	4753839	4758035	-	4197	2.62012	0.00695514	0.318263	1121.33	96.9701	122.001	63.0837	72.0036	9.98618	73.7174	72.4923	1762	73	90	61	56	8	171	67	up
ENSMUSG00000044860.9	Gm1123	9	99006790	99035715	-	28926	4.64114	0.035275	0.71834	0	63.7612	48.8003	27.9223	0	0	5.17315	0	0	48	36	27	0	0	12	0	up
ENSMUSG00000045064.4	Zc2hc1c	12	85288591	85299358	+	10768	20.2729	2.20747e-09	4.28602e-07	57.9119	0	0	0	0	0	0	0	91	0	0	0	0	0	0	0	up
ENSMUSG00000045100.11	Slc25a26	6	94500331	94604672	+	104342	1.14927	0.0194784	0.563116	3863.55	3223.92	3597.66	2602.98	685.32	735.232	3223.73	1342.73	6071	2427	2654	2517	533	589	7478	1241	up
ENSMUSG00000045377.5	Tmem88	11	69396519	69398234	-	1716	20.5128	1.41444e-09	2.9734e-07	66.185	0	0	0	0	0	0	0	104	0	0	0	0	0	0	0	up
ENSMUSG00000045657.3	Pcdhb10	18	37411664	37414514	+	2851	7.65459	0.00281167	0.179889	0	78.3731	55.5781	4.13663	0	0	0	0	0	59	41	4	0	0	0	0	up
ENSMUSG00000045709.10	Smkr-ps	6	29985329	29993776	+	8448	1.0839	0.000140311	0.0167647	2220.38	1089.25	1769.01	2159.32	884.616	802.639	1013.94	713.021	3489	820	1305	2088	688	643	2352	659	up
ENSMUSG00000046182.8	Gsg1l	7	125878420	126082411	-	203992	8.01403	3.41908e-07	5.93751e-05	38.82	42.5075	81.3338	14.4782	0	0	0	0	61	32	60	14	0	0	0	0	up
ENSMUSG00000046317.14	BC107364	3	96433788	96452306	-	18519	7.72249	0.00145103	0.112693	91.0044	41.1791	12.2001	0	0	0	0	0	143	31	9	0	0	0	0	0	up
ENSMUSG00000046709.16	Mapk10	5	102907948	103211334	-	303387	1.14438	0.0323682	0.69641	221.465	912.582	1443.67	909.025	336.874	381.971	590.17	266.166	348	687	1065	879	262	306	1369	246	up
ENSMUSG00000047330.8	Kcne4	1	78816758	78820028	+	3271	21.7473	1.32939e-10	7.14776e-08	161.008	0	0	0	0	0	0	0	253	0	0	0	0	0	0	0	up
ENSMUSG00000047867.11	Gimap6	6	48701582	48708225	-	6644	8.35694	0.00574881	0.282159	0	156.746	67.7782	0	0	0	0	0	0	118	50	0	0	0	0	0	up
ENSMUSG00000048450.10	Msx1	5	37820485	37824583	-	4099	21.0224	5.39991e-10	1.46579e-07	0	95.6418	0	0	0	0	0	0	0	72	0	0	0	0	0	0	up
ENSMUSG00000049148.8	Plcxd3	15	4375491	4575553	+	200063	1.88136	3.32065e-05	0.0047128	497.024	700.045	559.848	1036.23	255.87	245.91	182.353	74.6563	781	527	413	1002	199	197	423	69	up
ENSMUSG00000050029.7	Rap2c	X	51003912	51018018	-	14107	1.29565	0.00512259	0.260879	846.404	515.403	669.648	238.891	223.726	133.565	247.018	320.265	1330	388	494	231	174	107	573	296	up
ENSMUSG00000050368.4	Hoxd10	2	74691924	74695105	+	3182	23.2006	7.08013e-12	7.33161e-09	560.027	0	0	0	0	0	0	0	880	0	0	0	0	0	0	0	up
ENSMUSG00000050534.8	Htr5b	1	121509842	121528465	-	18624	1.98756	0.00864176	0.361159	908.771	232.463	248.068	288.53	73.2894	144.8	189.251	15.1476	1428	175	183	279	57	116	439	14	up
ENSMUSG00000051257.3	Trap1a	X	139333683	139338169	+	4487	7.23064	0.0298383	0.67499	45.8204	0	0	56.8787	0	0	0	0	72	0	0	55	0	0	0	0	up
ENSMUSG00000051900.12	Abca16	7	120409647	120544813	+	135167	1.07281	0.0448849	0.76291	80.8221	357.328	287.379	482.952	135.007	131.069	140.106	167.706	127	269	212	467	105	105	325	155	up
ENSMUSG00000052125.16	F730043M19Rik	12	33111711	33147597	-	35887	7.83479	1.61021e-05	0.00242043	94.1863	42.5075	6.77782	12.4099	0	0	0	0	148	32	5	12	0	0	0	0	up
ENSMUSG00000053101.3	Gpr141	13	19749682	19824257	-	74576	20.758	8.91933e-10	2.01109e-07	78.9129	0	0	0	0	0	0	0	124	0	0	0	0	0	0	0	up
ENSMUSG00000053856.7	Dnajc5g	5	31106285	31112526	+	6242	1.39626	0.00129025	0.103661	307.378	208.552	181.645	269.915	54.0027	113.593	133.64	64.9185	483	157	134	261	42	91	310	60	up
ENSMUSG00000053961.6	Ang5	14	43957069	43963080	+	6012	6.78773	0.0451144	0.76291	0	75.7164	0	0	0	0	0	0	0	57	0	0	0	0	0	0	up
ENSMUSG00000054383.2	Pnma1	12	84146131	84148489	-	2359	7.34745	0.00416776	0.226705	88.4588	9.29851	0	13.4441	0	0	0	0	139	7	0	13	0	0	0	0	up
ENSMUSG00000054423.14	Cadps	14	12372563	12823079	-	450517	7.1835	0.00462967	0.243214	0	42.5075	27.1113	29.9906	0	0	0	0	0	32	20	29	0	0	0	0	up
ENSMUSG00000054435.16	Gimap4	6	48684549	48692060	+	7512	6.83755	0.0435518	0.753678	0	78.3731	0	0	0	0	0	0	0	59	0	0	0	0	0	0	up
ENSMUSG00000054545.17	Ugt1a6a	1	88134809	88218997	+	84189	7.11134	0.0357589	0.720117	65.5486	0	0	28.9564	0	0	0	0	103	0	0	28	0	0	0	0	up
ENSMUSG00000054753.9	AU018091	7	3154658	3169203	-	14546	1.06676	0.0198999	0.568159	684.76	1195.52	814.693	1669.13	414.021	458.116	933.322	274.822	1076	900	601	1614	322	367	2165	254	up
ENSMUSG00000054855.13	Rnd1	15	98663421	98677461	-	14041	1.83319	0.0261934	0.640096	113.278	441.015	242.646	257.505	169.723	93.6204	12.0707	21.6395	178	332	179	249	132	75	28	20	up
ENSMUSG00000055312.2	Them7	2	105224320	105379796	+	155477	7.59214	0.019182	0.558076	113.278	0	0	18.6149	0	0	0	0	178	0	0	18	0	0	0	0	up
ENSMUSG00000055560.8	Zfp459	13	67405709	67421418	-	15710	7.15073	0.0338319	0.708491	63.003	0	0	34.1272	0	0	0	0	99	0	0	33	0	0	0	0	up
ENSMUSG00000055737.12	Ghr	15	3317760	3583492	-	265733	1.30405	0.014699	0.485205	414.929	178	142.334	323.692	88.7188	49.9309	134.071	155.804	652	134	105	313	69	40	311	144	up
ENSMUSG00000056148.8	Rdh9	10	127776386	127792697	+	16312	21.2312	3.61995e-10	1.25863e-07	0	0	111.156	0	0	0	0	0	0	0	82	0	0	0	0	0	up
ENSMUSG00000056380.13	Gpr50	X	71663667	71669257	+	5591	1.29228	0.00054124	0.0519177	311.197	332.089	622.203	561.548	239.155	124.827	190.975	190.428	489	250	459	543	186	100	443	176	up
ENSMUSG00000056753.3	C330011M18Rik	8	84065236	84067287	-	2052	7.23406	0.00485955	0.250679	16.5462	74.388	12.2001	0	0	0	0	0	26	56	9	0	0	0	0	0	up
ENSMUSG00000059303.6	Olfr836	9	19120382	19125938	+	5557	6.8921	0.0418935	0.746945	0	54.4627	0	26.8881	0	0	0	0	0	41	0	26	0	0	0	0	up
ENSMUSG00000060044.8	Tmem26	10	68723646	68782650	+	59005	8.74463	3.13901e-05	0.00448989	66.8214	94.3134	0	132.372	0	0	0	0	105	71	0	128	0	0	0	0	up
ENSMUSG00000060499.7	Rpl10l	12	66283379	66284401	-	1023	6.97649	0.0394336	0.737857	0	0	18.9779	67.2203	0	0	0	0	0	0	14	65	0	0	0	0	up
ENSMUSG00000061633.3	1700029P11Rik	15	81980540	81981563	+	1024	1.22448	0.0040293	0.222199	1301.43	2203.75	1748.68	2261.7	1089.05	1089.74	744.933	293.215	2045	1659	1290	2187	847	873	1728	271	up
ENSMUSG00000062007.13	Hsh2d	8	72189638	72201527	+	11890	7.84622	0.0118463	0.430281	91.0044	66.4179	0	0	0	0	0	0	143	50	0	0	0	0	0	0	up
ENSMUSG00000062300.14	Nectin2	7	19716644	19750483	-	33840	1.21697	0.0436051	0.753678	745.854	130.179	280.602	506.738	165.866	157.282	303.06	88.7219	1172	98	207	490	129	126	703	82	up
ENSMUSG00000062470.10	Fbxl12os	9	20607458	20617271	+	9814	21.3021	3.15436e-10	1.18843e-07	121.551	0	0	0	0	0	0	0	191	0	0	0	0	0	0	0	up
ENSMUSG00000063130.4	Calml3	13	3802896	3804316	-	1421	20.4863	1.48663e-09	3.07886e-07	64.9122	0	0	0	0	0	0	0	102	0	0	0	0	0	0	0	up
ENSMUSG00000064563.1	Snora7a	6	115807975	115808114	-	140	3.11619	0.0354485	0.718842	14.0007	22.5821	28.4668	16.5465	1.28578	0	7.32863	0	22	17	21	16	1	0	17	0	up
ENSMUSG00000065208.1	Gm24616	16	23111617	23111755	+	139	1.14867	0.0428863	0.751289	55.3663	37.194	43.378	52.7421	34.716	17.4758	14.6573	19.4755	87	28	32	51	27	14	34	18	up
ENSMUSG00000067229.3	Cyp2c66	19	39113898	39187072	+	73175	21.6119	1.7326e-10	8.49853e-08	145.734	0	0	0	0	0	0	0	229	0	0	0	0	0	0	0	up
ENSMUSG00000067818.6	Myl9	2	156775420	156781658	+	6239	21.4935	2.18136e-10	9.83688e-08	0	134.164	0	0	0	0	0	0	0	101	0	0	0	0	0	0	up
ENSMUSG00000068706.2	Gm10250	15	5120602	5121172	-	571	1.06966	0.00358358	0.207676	1235.88	431.716	596.448	973.143	369.019	406.937	380.657	387.347	1942	325	440	941	287	326	883	358	up
ENSMUSG00000071317.4	Bves	10	45335772	45372479	+	36708	20.2834	2.17053e-09	4.24376e-07	56.0027	0	0	0	0	0	0	0	88	0	0	0	0	0	0	0	up
ENSMUSG00000071551.13	Akr1c19	13	4228700	4252843	+	24144	1.40891	0.00715108	0.323751	203.646	104.94	81.3338	198.558	88.7188	38.6964	50.8693	44.361	320	79	60	192	69	31	118	41	up
ENSMUSG00000073158.4	9030624G23Rik	12	24043202	24097246	-	54045	1.89125	0.000315082	0.032994	428.93	668.164	326.691	146.851	96.4334	131.069	61.6467	135.247	674	503	241	142	75	105	143	125	up
ENSMUSG00000073375.2	Lrrc30	17	67630965	67632723	-	1759	22.3522	4.00553e-11	3.39366e-08	248.194	0	0	0	0	0	0	0	390	0	0	0	0	0	0	0	up
ENSMUSG00000073491.11	Ifi213	1	173566283	173599274	-	32992	4.34402	0.025068	0.627586	2.54558	14.6119	12.2001	16.5465	0	0	1.72438	0	4	11	9	16	0	0	4	0	up
ENSMUSG00000073802.4	Cdkn2b	4	89306289	89311032	-	4744	8.59391	0.00297487	0.18649	187.736	0	0	76.5277	0	0	0	0	295	0	0	74	0	0	0	0	up
ENSMUSG00000073901.4	Olfr703	7	106843360	106846207	+	2848	2.81893	0.0300811	0.67499	49.0024	203.239	136.912	4.13663	34.716	9.98618	11.2085	0	77	153	101	4	27	8	26	0	up
ENSMUSG00000074846.3	Gm10774	2	126709354	126709557	-	204	7.46006	6.68211e-05	0.00889644	0.636394	1.32836	685.915	1.03416	1.28578	1.24827	0.431096	1.08197	1	1	506	1	1	1	1	1	up
ENSMUSG00000076609.2	Igkc	6	70726435	70726966	+	532	25.0691	1.27166e-13	2.96286e-10	0	1745.46	0	4.13663	0	0	0	0	0	1314	0	4	0	0	0	0	up
ENSMUSG00000078626.2	Gm12790	4	101967453	101981049	-	13597	1.39755	0.0302247	0.675729	273.649	108.925	52.867	77.5619	47.5738	59.9171	30.1767	58.4266	430	82	39	75	37	48	70	54	up
ENSMUSG00000078798.4	Sult2a1	7	13796246	13837409	-	41164	6.53944	0.0172656	0.53047	38.82	0	8.13338	16.5465	0	0	0	0	61	0	6	16	0	0	0	0	up
ENSMUSG00000079444.9	Gm21981	17	47686739	47694455	-	7717	24.0603	1.15582e-12	1.46499e-09	894.77	0	0	0	0	0	0	0	1406	0	0	0	0	0	0	0	up
ENSMUSG00000079457.9	Gm7609	1	85199613	85213786	+	14174	2.40842	0.00996562	0.391333	15.2735	11.9552	21.689	15.5124	2.57156	4.99309	2.58657	2.16395	24	9	16	15	2	4	6	2	up
ENSMUSG00000079491.9	H2-T10	17	36115876	36121465	-	5590	1.39428	0.0365094	0.726532	943.136	5397.12	6089.19	588.436	1418.21	1594.04	1057.05	882.892	1482	4063	4492	569	1103	1277	2452	816	up
ENSMUSG00000079495.2	Nat8f6	6	85808024	85820954	-	12931	6.65511	0.0495079	0.784136	0	69.0746	0	0	0	0	0	0	0	52	0	0	0	0	0	0	up
ENSMUSG00000080298.2	Gm14807	X	95252916	95253898	-	983	2.49328	0.0107837	0.409648	95.4591	30.5522	79.9782	54.8104	0	9.98618	16.3816	19.4755	150	23	59	53	0	8	38	18	up
ENSMUSG00000082624.1	Gm12535	3	109907384	109907867	+	484	1.11287	0.017985	0.533804	220.829	151.433	143.69	160.295	117.006	89.8756	72.4241	34.6232	347	114	106	155	91	72	168	32	up
ENSMUSG00000083548.1	Gm11514	11	95176813	95177244	+	432	1.54382	0.0125723	0.443474	292.105	108.925	65.067	154.09	29.5729	86.1308	54.3181	43.279	459	82	48	149	23	69	126	40	up
ENSMUSG00000084514.1	Mir1893	18	6490564	6490646	-	83	6.45523	0.000272412	0.0295208	1.27279	443.672	1.35556	2.06832	1.28578	2.49654	0.431096	1.08197	2	334	1	2	1	2	1	1	up
ENSMUSG00000085162.7	Gm12295	11	65277654	65365798	-	88145	7.31236	0.00346041	0.202829	39.4564	57.1194	12.2001	0	0	0	0	0	62	43	9	0	0	0	0	0	up
ENSMUSG00000085166.1	Gm15522	5	34650718	34652477	+	1760	6.85134	0.0107798	0.409648	4.45476	0	48.8003	25.854	0	0	0	0	7	0	36	25	0	0	0	0	up
ENSMUSG00000085180.1	AI838599	4	3242055	3258092	+	16038	3.4634	0.0405883	0.740452	35.0017	22.5821	61.0003	66.1861	0	0	15.9505	0	55	17	45	64	0	0	37	0	up
ENSMUSG00000085246.1	Gm15893	11	88356291	88363947	+	7657	1.7004	0.0496182	0.784136	67.4578	37.194	81.3338	63.0837	1.28578	14.9793	29.3145	30.2953	106	28	60	61	1	12	68	28	up
ENSMUSG00000085303.3	Gm16751	2	160840836	160888028	-	47193	2.68498	0.0218237	0.588399	185.191	90.3283	28.4668	14.4782	0	9.98618	15.5194	23.8034	291	68	21	14	0	8	36	22	up
ENSMUSG00000085519.1	Gm13703	2	73357268	73364333	+	7066	1.04367	0.00497608	0.25481	133.006	152.761	155.89	145.816	48.8596	103.607	70.6997	61.6726	209	115	115	141	38	83	164	57	up
ENSMUSG00000085885.1	Gm11906	4	24966517	25271099	+	304583	6.79079	0.0450172	0.76291	0	0	40.6669	35.1614	0	0	0	0	0	0	30	34	0	0	0	0	up
ENSMUSG00000086050.1	Gm16045	11	117257649	117263437	-	5789	20.4722	1.52611e-09	3.11449e-07	64.2758	0	0	0	0	0	0	0	101	0	0	0	0	0	0	0	up
ENSMUSG00000086141.7	9030622O22Rik	2	147944740	148040203	-	95464	3.9997	0.01985	0.568159	169.917	42.5075	54.2225	67.2203	0	21.2206	0	0	267	32	40	65	0	17	0	0	up
ENSMUSG00000086446.1	Prkag2os1	5	24902569	24906850	+	4282	4.66708	0.0308337	0.679873	60.4574	0	28.4668	32.0589	0	0	4.31096	0	95	0	21	31	0	0	10	0	up
ENSMUSG00000086459.2	1700030C12Rik	11	23497753	23499661	+	1909	6.62038	0.00289986	0.18365	78.2765	27.8955	10.8445	0	0	1.24827	0	0	123	21	8	0	0	1	0	0	up
ENSMUSG00000086584.8	Gm12002	11	12314514	12351028	+	36515	7.57009	0.0198172	0.568159	0	59.7761	0	70.3228	0	0	0	0	0	45	0	68	0	0	0	0	up
ENSMUSG00000086739.1	Gm4409	6	79926414	80023156	-	96743	3.17983	0.0177098	0.533144	134.279	212.537	100.312	65.152	42.4307	0	14.2262	0	211	160	74	63	33	0	33	0	up
ENSMUSG00000086894.2	Gm15708	5	144277061	144280513	+	3453	6.98579	0.00224761	0.151206	183.282	1.32836	1.35556	1.03416	0	0	0.862191	0	288	1	1	1	0	0	2	0	up
ENSMUSG00000086970.1	Bcas1os1	2	170405181	170407175	+	1995	1.03243	0.0362419	0.724812	98.0047	85.0149	132.845	101.348	47.5738	77.3929	25.4346	55.1807	154	64	98	98	37	62	59	51	up
ENSMUSG00000087179.8	Gm14230	2	156833049	156839892	-	6844	1.1732	0.0425548	0.749967	95.4591	154.09	364.646	234.754	123.435	91.1238	122	38.9511	150	116	269	227	96	73	283	36	up
ENSMUSG00000087225.1	Gm14014	2	106574791	106580840	-	6050	21.1325	4.3747e-10	1.35083e-07	0	103.612	0	0	0	0	0	0	0	78	0	0	0	0	0	0	up
ENSMUSG00000087265.1	Gm12349	11	100291671	100293711	+	2041	20.5541	1.30937e-09	2.81605e-07	68.0942	0	0	0	0	0	0	0	107	0	0	0	0	0	0	0	up
ENSMUSG00000087691.1	Gm15674	1	130422824	130437914	+	15091	7.26306	0.0319786	0.69095	0	0	20.3334	84.801	0	0	0	0	0	0	15	82	0	0	0	0	up
ENSMUSG00000089696.3	Gm4778	3	94264036	94266784	+	2749	6.89042	0.0419437	0.746945	0	0	46.0891	35.1614	0	0	0	0	0	0	34	34	0	0	0	0	up
ENSMUSG00000089827.1	1700023H06Rik	13	80884224	80885524	-	1301	7.15891	0.0332969	0.706795	60.4574	0	0	37.2297	0	0	0	0	95	0	0	36	0	0	0	0	up
ENSMUSG00000090063.6	Dlx6os1	6	6820189	6871592	-	51404	4.87589	6.8096e-05	0.0090232	56.0027	174.015	277.89	34.1272	0	0	5.17315	12.9837	88	131	205	33	0	0	12	12	up
ENSMUSG00000090093.8	Gm14399	2	175129493	175142012	-	12520	1.48791	0.0298977	0.67499	74.4581	69.0746	264.335	243.027	28.2871	96.1169	34.4877	73.5743	117	52	195	235	22	77	80	68	up
ENSMUSG00000090257.1	Gm4524	16	25956475	25960342	+	3868	7.80483	0.0134393	0.457117	118.369	34.5373	0	0	0	0	0	0	186	26	0	0	0	0	0	0	up
ENSMUSG00000090355.3	Vmn2r-ps128	17	22916878	22932941	-	16064	6.73059	0.0116775	0.426786	8.27312	0	23.0446	41.3663	0	0	0	0	13	0	17	40	0	0	0	0	up
ENSMUSG00000091277.2	Gm1818	12	48555308	48559885	-	4578	20.4456	1.55636e-09	3.15321e-07	131.097	0	0	0	0	0	0	0	206	0	0	0	0	0	0	0	up
ENSMUSG00000091685.6	Gm17359	3	79336661	79464129	+	127469	1.67708	0.0110336	0.412033	215.738	54.4627	195.201	341.272	39.8592	32.4551	72.4241	107.116	339	41	144	330	31	26	168	99	up
ENSMUSG00000091923.7	Gm8267	14	44716838	44724987	-	8150	2.50171	0.0362409	0.724812	7.00034	83.6865	51.5114	55.8446	5.14312	12.4827	16.8127	0	11	63	38	54	4	10	39	0	up
ENSMUSG00000092137.7	Gcom1	9	71479325	71592265	-	112941	20.4965	1.40172e-09	2.96899e-07	0	0	0	218.207	0	0	0	0	0	0	0	211	0	0	0	0	up
ENSMUSG00000092470.1	Gm20518	16	17835277	17891671	-	56395	21.0527	5.09679e-10	1.4109e-07	0	0	97.6005	0	0	0	0	0	0	0	72	0	0	0	0	0	up
ENSMUSG00000092591.1	Gm20429	17	37246961	37263064	+	16104	6.72369	0.0122432	0.438295	9.54591	39.8507	23.0446	0	0	0	0	0	15	30	17	0	0	0	0	0	up
ENSMUSG00000093593.1	Gm20683	17	25834465	25841763	-	7299	7.3515	0.0299377	0.67499	104.369	0	0	7.23911	0	0	0	0	164	0	0	7	0	0	0	0	up
ENSMUSG00000093877.4	Olfr1348	7	6499793	6508748	-	8956	20.8798	7.07343e-10	1.71776e-07	88.4588	0	0	0	0	0	0	0	139	0	0	0	0	0	0	0	up
ENSMUSG00000093976.2	Gm8674	13	49899435	49904597	-	5163	21.2121	3.75548e-10	1.28048e-07	0	0	0	109.621	0	0	0	0	0	0	0	106	0	0	0	0	up
ENSMUSG00000094194.2	Ighv5-16	12	113838526	113839010	-	485	19.8568	4.56463e-09	8.50816e-07	0	87.6716	0	0	0	0	0	0	0	66	0	0	0	0	0	0	up
ENSMUSG00000094278.1	Gm12626	11	60631047	60633029	-	1983	3.85781	0.00806278	0.348851	19.0918	26.5672	1.35556	8.27327	1.28578	1.24827	0.431096	1.08197	30	20	1	8	1	1	1	1	up
ENSMUSG00000094365.1	Gm21982	7	30641001	30664937	-	23937	4.46226	5.36602e-05	0.00728294	31.8197	22.5821	17.6223	38.2639	0	1.24827	2.15548	1.08197	50	17	13	37	0	1	5	1	up
ENSMUSG00000094682.2	Gm6902	7	23272801	23278900	-	6100	1.38166	0.00629216	0.29868	315.015	272.313	532.736	545.002	254.584	202.22	64.2333	120.099	495	205	393	527	198	162	149	111	up
ENSMUSG00000094797.1	Igkv6-15	6	70406469	70406992	-	524	23.383	4.82785e-12	5.19161e-09	0	1126.45	0	0	0	0	0	0	0	848	0	0	0	0	0	0	up
ENSMUSG00000095190.3	Gm10668	7	20724525	20730624	-	6100	1.70271	0.00127283	0.102853	605.211	504.776	954.316	939.016	424.307	288.351	95.2721	116.853	951	380	704	908	330	231	221	108	up
ENSMUSG00000095201.1	Vmn1r91	7	20101158	20102081	+	924	4.02353	0.0276029	0.656809	0.636394	3.98507	33.8891	37.2297	0	1.24827	3.01767	0	1	3	25	36	0	1	7	0	up
ENSMUSG00000095276.2	Gfy	7	45176349	45179569	-	3221	2.61703	0.0176273	0.533144	56.6391	94.3134	32.5335	24.8198	0	11.2344	3.44877	19.4755	89	71	24	24	0	9	8	18	up
ENSMUSG00000095363.2	Gm4567	7	22713611	22719710	-	6100	1.97038	0.000258135	0.0281922	755.4	561.895	1186.12	954.528	420.45	267.13	113.378	83.3121	1187	423	875	923	327	214	263	77	up
ENSMUSG00000096283.2	Gm6176	7	22050205	22056305	-	6101	1.17931	0.0304864	0.677915	427.657	498.134	898.738	983.485	390.877	549.24	111.223	190.428	672	375	663	951	304	440	258	176	up
ENSMUSG00000096485.3	Olfr1466	19	13338862	13343572	+	4711	3.77301	0.0352512	0.71834	15.9099	0	4.06669	122.031	2.57156	6.24136	1.72438	0	25	0	3	118	2	5	4	0	up
ENSMUSG00000096690.1	Olfr1296-ps1	2	111593073	111594011	-	939	7.72485	0.0161957	0.51398	0	73.0597	71.8448	0	0	0	0	0	0	55	53	0	0	0	0	0	up
ENSMUSG00000096937.1	Gm10825	10	22402883	22407470	+	4588	20.7922	8.36062e-10	1.91602e-07	80.8221	0	0	0	0	0	0	0	127	0	0	0	0	0	0	0	up
ENSMUSG00000097229.1	Platr23	1	136622098	136624650	-	2553	6.7387	0.0466986	0.768666	0	0	73.2004	0	0	0	0	0	0	0	54	0	0	0	0	0	up
ENSMUSG00000097234.1	Gm26518	15	102455526	102483722	-	28197	22.0933	6.71687e-11	4.47136e-08	206.192	0	0	0	0	0	0	0	324	0	0	0	0	0	0	0	up
ENSMUSG00000097628.1	Gm2383	1	12565577	12566383	+	807	6.09163	0.00544973	0.273399	0.636394	0	88.1116	28.9564	0	1.24827	0.431096	0	1	0	65	28	0	1	1	0	up
ENSMUSG00000097791.1	Gm17315	17	79354699	79358022	+	3324	1.25157	0.00613689	0.294897	278.741	166.045	126.067	229.583	108.005	113.593	64.6643	51.9348	438	125	93	222	84	91	150	48	up
ENSMUSG00000097806.3	Gm6556	13	15440302	15463736	-	23435	1.76901	0.00695133	0.318263	129.824	116.895	42.0225	106.518	18.0009	36.1999	47.8516	12.9837	204	88	31	103	14	29	111	12	up
ENSMUSG00000098211.2	Gm27045	8	121542080	121543481	+	1402	21.0048	5.58075e-10	1.50031e-07	95.4591	0	0	0	0	0	0	0	150	0	0	0	0	0	0	0	up
ENSMUSG00000098235.1	Gm7497	18	9748722	9749724	+	1003	6.60251	0.0159643	0.509527	0	15.9403	21.689	28.9564	0	0	0	0	0	12	16	28	0	0	0	0	up
ENSMUSG00000098623.1	Mir8112	6	71271671	71271801	+	131	4.71822	0.0029546	0.186473	1.27279	3.98507	254.846	3.10248	3.85734	1.24827	1.72438	3.24592	2	3	188	3	3	1	4	3	up
ENSMUSG00000098950.7	Gm28036	2	156071845	156127092	-	55248	2.56164	0.0233619	0.603117	523.752	1219.43	252.135	47.5713	173.58	144.8	27.159	1.08197	823	918	186	46	135	116	63	1	up
ENSMUSG00000099041.1	Gm28035	2	30240567	30282148	+	41582	3.72809	0.000200527	0.0227908	76.3673	164.716	25.7557	116.86	2.57156	2.49654	20.2615	2.16395	120	124	19	113	2	2	47	2	up
ENSMUSG00000099473.1	Gm18775	1	17993010	17999622	-	6613	20.6562	1.08073e-09	2.39811e-07	0	0	0	73.4253	0	0	0	0	0	0	0	71	0	0	0	0	up
ENSMUSG00000099924.1	Gm28320	1	51148309	51150581	+	2273	3.5417	0.0473445	0.771747	5.72755	70.403	35.2446	52.7421	0	0	13.364	0	9	53	26	51	0	0	31	0	up
ENSMUSG00000100147.2	1700047M11Rik	1	182287990	182303325	+	15336	6.47127	0.00210265	0.145707	50.2751	96.9701	0	17.5807	0	0	1.29329	0	79	73	0	17	0	0	3	0	up
ENSMUSG00000100294.6	1700034K08Rik	9	92979914	93005739	-	25826	1.05551	0.00431178	0.231511	2649.31	1050.73	1131.9	1519.18	582.458	1021.09	808.735	644.857	4163	791	835	1469	453	818	1876	596	up
ENSMUSG00000100455.1	Gm29170	1	143777642	143781307	+	3666	7.34138	0.0289773	0.671488	0	69.0746	42.0225	0	0	0	0	0	0	52	31	0	0	0	0	0	up
ENSMUSG00000100813.1	Gm28874	4	132265708	132268841	+	3134	19.5639	7.69912e-09	1.42556e-06	76.3673	0	0	0	0	0	0	0	120	0	0	0	0	0	0	0	up
ENSMUSG00000101303.1	B020011L13Rik	1	117781133	117803359	+	22227	1.01017	0.0076405	0.337474	3967.28	4556.27	10090.8	11229.9	4385.79	3606.26	3868.65	2955.96	6234	3430	7444	10859	3411	2889	8974	2732	up
ENSMUSG00000102633.1	Gm38224	1	21234722	21236821	+	2100	1.71074	0.028912	0.671488	156.553	1145.04	104.378	366.092	181.295	163.524	157.35	38.9511	246	862	77	354	141	131	365	36	up
ENSMUSG00000102863.1	Gm37639	17	71366052	71368836	-	2785	20.9841	5.80766e-10	1.50348e-07	92.9136	0	0	0	0	0	0	0	146	0	0	0	0	0	0	0	up
ENSMUSG00000103473.1	Gm37696	3	61358549	61361897	-	3349	1.33097	0.000725154	0.0654019	1063.41	1291.16	886.538	2486.12	402.449	778.922	578.099	517.184	1671	972	654	2404	313	624	1341	478	up
ENSMUSG00000103657.1	Gm37204	9	100665839	100669799	+	3961	6.9674	0.0396927	0.737857	38.1837	0	47.4447	0	0	0	0	0	60	0	35	0	0	0	0	0	up
ENSMUSG00000103703.2	Gm42568	3	67476978	67478818	+	1841	7.76351	0.00206209	0.144926	2.54558	53.1343	0	93.0743	0	0	0	0	4	40	0	90	0	0	0	0	up
ENSMUSG00000103873.1	Ighv1-38	12	114910011	114910443	-	433	20.1539	2.67757e-09	5.12754e-07	0	90.3283	0	0	0	0	0	0	0	68	0	0	0	0	0	0	up
ENSMUSG00000104155.1	Gm38103	12	56609613	56610476	-	864	6.6952	0.00183773	0.133883	47.0932	9.29851	12.2001	2.06832	0	0	0	0	74	7	9	2	0	0	0	0	up
ENSMUSG00000104213.5	Ighd	12	113406604	113416324	-	9721	9.28453	7.46192e-05	0.00974896	8.27312	401.164	0	17.5807	0	0	0	0	13	302	0	17	0	0	0	0	up
ENSMUSG00000104339.1	C130089K02Rik	3	52057285	52064244	-	6960	6.33372	0.00545609	0.273399	38.82	0	5.42225	43.4347	0	0	0.431096	0	61	0	4	42	0	0	1	0	up
ENSMUSG00000104525.1	Gm37334	1	194993258	194996195	+	2938	20.2834	2.17053e-09	4.24376e-07	56.0027	0	0	0	0	0	0	0	88	0	0	0	0	0	0	0	up
ENSMUSG00000104745.1	Gm43073	3	97273876	97275064	-	1189	20.5424	1.33835e-09	2.85641e-07	67.4578	0	0	0	0	0	0	0	106	0	0	0	0	0	0	0	up
ENSMUSG00000104822.1	Gm42967	3	152380857	152383168	-	2312	1.92389	0.0486869	0.777849	127.279	9.29851	33.8891	37.2297	23.144	3.74482	15.0883	12.9837	200	7	25	36	18	3	35	12	up
ENSMUSG00000104975.1	Iglj2	16	19200198	19200235	-	38	4.2774	0.0179622	0.533804	71.2761	1.32836	1.35556	1.03416	1.28578	1.24827	0.431096	1.08197	112	1	1	1	1	1	1	1	up
ENSMUSG00000105124.2	Gm5297	5	72626858	72628028	-	1171	3.91616	0.0496263	0.784136	7.00034	62.4328	1.35556	0	0	1.24827	2.15548	1.08197	11	47	1	0	0	1	5	1	up
ENSMUSG00000105387.1	Gm29681	5	131391600	131414718	-	23119	20.8357	7.70013e-10	1.80914e-07	0	83.6865	0	0	0	0	0	0	0	63	0	0	0	0	0	0	up
ENSMUSG00000105500.1	Gm42591	5	131624842	131625541	-	700	6.75543	0.0112703	0.416256	7.00034	0	33.8891	33.0931	0	0	0	0	11	0	25	32	0	0	0	0	up
ENSMUSG00000105646.1	Gm30211	6	70719074	70740554	+	21481	6.73614	0.0467828	0.768666	0	73.0597	0	0	0	0	0	0	0	55	0	0	0	0	0	0	up
ENSMUSG00000105936.1	Gm43544	1	139070213	139072684	+	2472	7.12005	0.035532	0.718842	89.7316	5.31343	0	0	0	0	0	0	141	4	0	0	0	0	0	0	up
ENSMUSG00000106035.1	Gm43545	5	104044619	104047397	-	2779	2.72582	0.00113634	0.0937198	42.002	94.3134	128.778	95.1426	5.14312	34.9516	4.31096	10.8197	66	71	95	92	4	28	10	10	up
ENSMUSG00000106285.1	Gm43574	3	148130244	148141598	+	11355	1.1339	0.00608144	0.293663	11866.8	7365.74	5816.72	13233.1	2152.39	3267.98	5593.9	6429.1	18647	5545	4291	12796	1674	2618	12976	5942	up
ENSMUSG00000106680.1	Gm43852	5	32713072	32713988	-	917	21.1385	4.32514e-10	1.35083e-07	103.732	0	0	0	0	0	0	0	163	0	0	0	0	0	0	0	up
ENSMUSG00000106735.1	A330058E17Rik	5	74172161	74176050	-	3890	1.50821	0.0353882	0.718532	98.6411	122.209	206.046	66.1861	16.7151	94.8687	42.2474	19.4755	155	92	152	64	13	76	98	18	up
ENSMUSG00000107019.1	Gm43682	5	93176970	93179059	+	2090	6.82857	0.0227144	0.594908	0	2.65672	73.2004	2.06832	0	0	0	0	0	2	54	2	0	0	0	0	up
ENSMUSG00000107263.1	Gm42471	5	115902430	115904294	+	1865	3.97645	0.0126515	0.444541	8.90952	21.2537	2.71113	58.947	0	2.49654	3.01767	0	14	16	2	57	0	2	7	0	up
ENSMUSG00000107699.1	Gm43970	2	39723995	39727599	+	3605	1.19098	0.0114555	0.420322	283.195	324.119	429.714	554.309	275.157	71.1515	196.58	153.64	445	244	317	536	214	57	456	142	up
ENSMUSG00000107703.1	Gm44039	6	15636124	15638369	+	2246	6.66905	0.00308901	0.189815	14.6371	6.64179	47.4447	1.03416	0	0	0	0	23	5	35	1	0	0	0	0	up
ENSMUSG00000108255.1	Gm16499	6	53819974	53822150	+	2177	2.52327	0.0128254	0.446556	40.0928	148.776	63.7115	44.4688	11.572	0	18.9682	20.5575	63	112	47	43	9	0	44	19	up
ENSMUSG00000108782.1	Gm32772	7	17287678	17371627	-	83950	1.41212	0.0192643	0.559887	60.4574	102.284	193.846	49.6396	42.4307	29.9585	47.8516	31.3773	95	77	143	48	33	24	111	29	up
ENSMUSG00000109088.1	Gm44593	X	110634586	110812324	-	177739	6.08015	0.0391184	0.737499	7.63673	27.8955	10.8445	0	0	0	0	0	12	21	8	0	0	0	0	0	up
ENSMUSG00000109215.1	4930453L07Rik	8	9144669	9149050	+	4382	1.10468	0.0381302	0.734217	29.2741	50.4776	50.1558	44.4688	18.0009	22.4689	16.8127	23.8034	46	38	37	43	14	18	39	22	up
ENSMUSG00000109231.1	Gm45737	7	46927813	46929424	-	1612	6.51486	0.019826	0.568159	8.90952	0	8.13338	45.503	0	0	0	0	14	0	6	44	0	0	0	0	up
ENSMUSG00000109237.1	9130214F15Rik	8	24506430	24508082	+	1653	8.44107	0.00397889	0.220452	71.2761	0	0	166.5	0	0	0	0	112	0	0	161	0	0	0	0	up
ENSMUSG00000109517.1	Gm44763	7	118967668	118969686	-	2019	20.8146	8.01392e-10	1.86718e-07	82.0948	0	0	0	0	0	0	0	129	0	0	0	0	0	0	0	up
ENSMUSG00000109598.1	Gm36356	7	135486029	135491315	+	5287	7.90256	0.000937887	0.0794618	0	61.1045	18.9779	83.7668	0	0	0	0	0	46	14	81	0	0	0	0	up
ENSMUSG00000110281.1	Gm2516	8	50368112	50416088	+	47977	2.04321	0.000353605	0.0367526	38.82	62.4328	89.4672	81.6985	20.5725	21.2206	12.9329	11.9017	61	47	66	79	16	17	30	11	up
ENSMUSG00000110311.1	Gm45410	8	13391106	13392198	+	1093	1.18955	0.0142537	0.473862	1220.6	244.418	554.425	659.793	228.869	338.282	242.276	366.79	1918	184	409	638	178	271	562	339	up
ENSMUSG00000110317.1	Gm45250	8	26151888	26155479	-	3592	7.29926	0.0311292	0.681018	102.459	0	0	5.17079	0	0	0	0	161	0	0	5	0	0	0	0	up
ENSMUSG00000110411.1	Gm45457	8	45779228	45782316	+	3089	6.77392	0.0455562	0.763358	0	0	32.5335	42.4005	0	0	0	0	0	0	24	41	0	0	0	0	up
ENSMUSG00000110507.1	8030455M16Rik	8	110047432	110057176	+	9745	6.62458	0.015353	0.498554	0	19.9254	31.178	16.5465	0	0	0	0	0	15	23	16	0	0	0	0	up
ENSMUSG00000111063.1	AC125374.1	9	122903246	122914154	+	10909	7.10009	0.0359567	0.722259	53.4571	0	0	40.3322	0	0	0	0	84	0	0	39	0	0	0	0	up
ENSMUSG00000111090.1	AC153912.3	10	29362148	29365345	+	3198	6.30782	0.033837	0.708491	41.3656	10.6269	0	2.06832	0	0	0	0	65	8	0	2	0	0	0	0	up
ENSMUSG00000111278.1	AC165256.1	9	103521787	103545977	+	24191	1.16467	0.0370143	0.730782	70.0034	55.791	107.089	59.9812	50.1454	34.9516	29.7456	16.2296	110	42	79	58	39	28	69	15	up
ENSMUSG00000111368.1	AC163661.1	10	43518571	43555817	+	37247	5.24023	0.000856707	0.0744044	158.462	174.015	27.1113	15.5124	0	0	9.05301	0	249	131	20	15	0	0	21	0	up
ENSMUSG00000111683.1	CT025617.1	9	36635753	36692969	-	57217	13.5802	1.87449e-05	0.00280262	0	3304.95	2235.32	2842.9	0	0	0	0	0	2488	1649	2749	0	0	0	0	up
ENSMUSG00000111720.1	AC118476.6	9	120834363	120844936	+	10574	1.54094	0.00189725	0.13532	227.193	130.179	97.6005	105.484	59.1458	34.9516	34.9187	64.9185	357	98	72	102	46	28	81	60	up
ENSMUSG00000111954.1	AC153943.1	10	57290889	57292353	+	1465	4.76674	0.001635	0.122227	98.6411	18.597	40.6669	66.1861	0	0	7.32863	0	155	14	30	64	0	0	17	0	up
ENSMUSG00000112258.1	AC154313.1	12	43810543	43844193	-	33651	6.84194	0.0434162	0.753678	0	0	78.6227	0	0	0	0	0	0	0	58	0	0	0	0	0	up
ENSMUSG00000112388.1	AC163033.2	12	76546972	76547943	-	972	1.08799	0.0108713	0.410746	241.83	172.687	119.29	231.652	87.433	116.089	103.894	53.0168	380	130	88	224	68	93	241	49	up
ENSMUSG00000113120.1	AC132621.1	12	112391526	112405812	-	14287	1.69376	0.0409964	0.740452	166.099	211.209	276.535	62.0495	15.4293	89.8756	11.6396	104.952	261	159	204	60	12	72	27	97	up
ENSMUSG00000113196.1	AC159193.3	12	98766105	98770355	+	4251	7.40107	0.0288436	0.671488	110.096	0	5.42225	0	0	0	0	0	173	0	4	0	0	0	0	0	up
ENSMUSG00000113309.1	AC173210.2	13	15768990	15770120	-	1131	2.24287	0.0416129	0.74398	31.1833	35.8657	36.6002	54.8104	0	2.49654	12.0707	18.3936	49	27	27	53	0	2	28	17	up
ENSMUSG00000113310.1	CT009546.2	13	13953219	13954338	+	1120	7.95041	0.000621164	0.0576981	64.2758	0	89.4672	15.5124	0	0	0	0	101	0	66	15	0	0	0	0	up
ENSMUSG00000113313.1	AC132085.1	13	20445286	20473490	-	28205	20.6779	1.03744e-09	2.32047e-07	74.4581	0	0	0	0	0	0	0	117	0	0	0	0	0	0	0	up
ENSMUSG00000113413.1	AC134917.1	12	22696934	22698887	-	1954	6.11915	0.034286	0.712185	11.4551	21.2537	14.9112	0	0	0	0	0	18	16	11	0	0	0	0	0	up
ENSMUSG00000113688.1	CT009754.5	13	17951938	17954912	+	2975	8.22918	0.000306821	0.0323713	120.915	15.9403	0	68.2545	0	0	0	0	190	12	0	66	0	0	0	0	up
ENSMUSG00000114051.1	AC134328.1	12	86078644	86079754	+	1111	4.20086	0.0252711	0.630738	19.7282	26.5672	8.13338	3.10248	0	0	2.58657	0	31	20	6	3	0	0	6	0	up
ENSMUSG00000114233.1	AC163631.2	13	35065461	35067620	+	2160	7.23676	0.0033068	0.199657	16.5462	41.1791	0	45.503	0	0	0	0	26	31	0	44	0	0	0	0	up
ENSMUSG00000114839.1	AC183092.2	13	66738371	66741313	-	2943	5.56187	0.0383087	0.734908	213.828	74.388	0	0	0	6.24136	0	0	336	56	0	0	0	5	0	0	up
ENSMUSG00000000078.7	Klf6	13	5861482	5870394	+	8913	-1.3878	0.042227	0.749127	1583.35	491.492	509.692	599.812	1177.77	348.268	2390.86	4418.79	2488	370	376	580	916	279	5546	4084	down
ENSMUSG00000000167.14	Pih1d2	9	50617321	50625000	+	7680	-1.27936	0.0210761	0.581521	29.9105	39.8507	28.4668	25.854	64.289	39.9447	124.156	70.3284	47	30	21	25	50	32	288	65	down
ENSMUSG00000000215.11	Ins2	7	142678656	142743381	-	64726	-1.06597	0.0395347	0.737857	129.824	100.955	56.9337	125.133	100.291	153.537	289.696	321.347	204	76	42	121	78	123	672	297	down
ENSMUSG00000000244.17	Tspan32	7	143005046	143019644	+	14599	-6.7922	0.0449247	0.76291	0	0	0	0	10.2862	74.8963	0	0	0	0	0	0	8	60	0	0	down
ENSMUSG00000000275.16	Trim25	11	88999376	89020293	+	20918	-2.11632	0.0185687	0.545338	131.097	5.31343	36.6002	160.295	263.585	89.8756	503.089	591.84	206	4	27	155	205	72	1167	547	down
ENSMUSG00000000290.13	Itgb2	10	77530252	77565708	+	35457	-6.03857	0.0262137	0.640096	0	0	0	4.13663	50.1454	223.441	0	0	0	0	0	4	39	179	0	0	down
ENSMUSG00000000326.12	Comt	16	18406886	18426852	-	19967	-1.1439	0.00626067	0.297691	445.476	204.567	155.89	322.657	438.451	594.177	888.488	576.693	700	154	115	312	341	476	2061	533	down
ENSMUSG00000000378.15	Ccm2	11	6546887	6596744	+	49858	-1.03383	0.0063406	0.299881	577.21	324.119	420.225	288.53	740.609	455.619	1014.37	1087.38	907	244	310	279	576	365	2353	1005	down
ENSMUSG00000000555.7	Itga5	15	103344286	103366763	-	22478	-1.60374	0.0439726	0.755179	363.381	78.3731	98.9561	115.826	132.435	220.944	1355.8	287.805	571	59	73	112	103	177	3145	266	down
ENSMUSG00000000579.14	Dynlt1c	17	6601671	6609774	+	8104	-1.15067	0.0294846	0.673293	2588.22	939.149	626.27	1139.64	1391.21	1816.24	4295.87	4252.16	4067	707	462	1102	1082	1455	9965	3930	down
ENSMUSG00000000957.10	Mmp14	14	54431612	54445364	+	13753	-1.92643	0.021698	0.587927	364.017	212.537	234.512	246.13	162.008	144.8	3040.95	669.742	572	160	173	238	126	116	7054	619	down
ENSMUSG00000001128.7	Cfp	X	20925454	20931555	-	6102	-9.94884	0.000243115	0.0268666	2.54558	0	0	0	1316.64	1386.83	32.7633	0	4	0	0	0	1024	1111	76	0	down
ENSMUSG00000001525.10	Tubb5	17	35833921	35838306	-	4386	-1.47788	0.0318798	0.689882	3986.37	1891.58	1789.34	2216.2	1953.1	1499.17	6227.61	17851.5	6264	1424	1320	2143	1519	1201	14446	16499	down
ENSMUSG00000001750.15	Tcirg1	19	3896050	3907133	-	11084	-3.12592	0.0437798	0.753718	13.3643	0	6.77782	53.7762	294.443	220.944	131.484	0	21	0	5	52	229	177	305	0	down
ENSMUSG00000001785.13	Pwp1	10	85829494	85889096	+	59603	-2.11511	0.00462879	0.243214	185.827	15.9403	101.667	51.7079	383.162	113.593	468.601	577.775	292	12	75	50	298	91	1087	534	down
ENSMUSG00000002014.12	Ssr4	X	73787028	73790830	+	3803	-1.39612	0.0377413	0.731261	1184.33	282.94	231.801	283.359	420.45	745.218	2235.66	1819.88	1861	213	171	274	327	597	5186	1682	down
ENSMUSG00000002057.4	Foxn1	11	78357577	78386558	-	28982	-6.84642	0.000145441	0.0172304	0	0	0	0	11.572	44.9378	14.6573	17.3116	0	0	0	0	9	36	34	16	down
ENSMUSG00000002343.11	Armc6	8	70220172	70234466	-	14295	-4.29008	0.000132409	0.0160958	0	13.2836	6.77782	8.27327	84.8614	17.4758	165.541	275.904	0	10	5	8	66	14	384	255	down
ENSMUSG00000002393.14	Nr2f6	8	71374123	71381960	-	7838	-1.38462	0.0437712	0.753718	107.551	51.806	85.4005	155.124	137.578	61.1653	497.484	347.314	169	39	63	150	107	49	1154	321	down
ENSMUSG00000002504.14	Slc9a3r2	17	24639282	24650305	-	11024	-1.21253	0.017556	0.533144	123.46	78.3731	70.4893	45.503	92.5761	178.503	276.763	189.346	194	59	52	44	72	143	642	175	down
ENSMUSG00000002550.16	Uck1	2	32255002	32260159	-	5158	-2.545	0.0104372	0.404137	236.739	59.7761	200.623	324.726	99.005	62.4136	1426.06	3210.22	372	45	148	314	77	50	3308	2967	down
ENSMUSG00000002820.6	Atg4d	9	21265293	21277772	+	12480	-2.56635	0.0268895	0.650235	78.9129	0	84.0449	49.6396	120.863	29.9585	664.318	444.692	124	0	62	48	94	24	1541	411	down
ENSMUSG00000002885.14	Adgre5	8	83723251	83741326	-	18076	-1.82846	0.0306205	0.679091	35.6381	55.791	5.42225	132.372	81.0041	143.551	308.233	281.313	56	42	4	128	63	115	715	260	down
ENSMUSG00000002957.11	Ap2a2	7	141562173	141633011	+	70839	-1.03394	0.00551179	0.274207	407.292	176.672	203.334	377.468	550.313	500.557	780.714	557.217	640	133	150	365	428	401	1811	515	down
ENSMUSG00000002985.16	Apoe	7	19696109	19699188	-	3080	-2.56792	0.00134255	0.106035	399.656	824.91	707.604	573.958	3103.87	10636.5	486.707	631.873	628	621	522	555	2414	8521	1129	584	down
ENSMUSG00000003072.15	Atp5d	10	80138632	80145818	+	7187	-1.70894	0.0106825	0.409071	1589.08	746.537	515.114	811.814	1557.08	466.854	3559.13	6393.39	2497	562	380	785	1211	374	8256	5909	down
ENSMUSG00000003153.10	Slc2a3	6	122727809	122801640	-	73832	-6.87734	0.000216014	0.0241581	0	0	0	0	21.8582	43.6895	19.3993	5.40987	0	0	0	0	17	35	45	5	down
ENSMUSG00000003348.10	Mob3a	10	80685253	80701977	-	16725	-1.004	0.0420195	0.74782	381.837	277.627	146.401	221.31	389.591	215.951	686.304	769.284	600	209	108	214	303	173	1592	711	down
ENSMUSG00000003429.11	Rps11	7	45122379	45124439	-	2061	-1.00616	0.0419363	0.746945	3512.9	1049.4	1199.67	1555.37	2320.83	1907.36	5224.88	5247.58	5520	790	885	1504	1805	1528	12120	4850	down
ENSMUSG00000003500.13	Impdh1	6	29200434	29216364	-	15931	-1.88095	0.0232044	0.600707	285.741	81.0298	93.5339	83.7668	168.437	58.6688	1056.18	722.759	449	61	69	81	131	47	2450	668	down
ENSMUSG00000003541.6	Ier3	17	35821684	35822923	+	1240	-1.84599	0.0295893	0.673293	6432.04	305.522	1606.34	2206.89	4586.37	1188.35	16505.4	15654	10107	230	1185	2134	3567	952	38287	14468	down
ENSMUSG00000003545.3	Fosb	7	19302696	19310051	-	7356	-1.60312	0.00389182	0.218497	248.83	205.895	150.468	144.782	286.729	284.606	431.958	1276.73	391	155	111	140	223	228	1002	1180	down
ENSMUSG00000003752.9	Itpkc	7	27207172	27228661	-	21490	-8.61522	3.98314e-05	0.00556823	0	0	0	0	75.861	0	121.138	103.87	0	0	0	0	59	0	281	96	down
ENSMUSG00000003848.14	Nob1	8	107412486	107425051	-	12566	-1.1801	0.0211552	0.581521	516.752	171.358	123.356	196.49	452.594	409.433	825.979	600.496	812	129	91	190	352	328	1916	555	down
ENSMUSG00000003970.8	Rpl8	15	76904071	76906318	+	2248	-1.42521	0.0176873	0.533144	1396.25	334.746	530.025	412.629	969.477	666.577	2738.75	2808.81	2194	252	391	399	754	534	6353	2596	down
ENSMUSG00000004451.14	Ralb	1	119470305	119504794	-	34490	-2.25572	0.0445836	0.761181	93.5499	130.179	0	78.596	74.5752	112.344	485.845	771.448	147	98	0	76	58	90	1127	713	down
ENSMUSG00000004530.12	Coro1c	5	113842436	113908758	-	66323	-1.29979	0.00788919	0.344514	359.563	225.821	98.9561	287.496	509.169	304.578	727.258	854.76	565	170	73	278	396	244	1687	790	down
ENSMUSG00000004562.16	Arhgef40	14	51984719	52006251	+	21533	-5.35926	0.0437235	0.753678	5.09115	0	0	0	0	0	121.569	97.3777	8	0	0	0	0	0	282	90	down
ENSMUSG00000004655.5	Aqp1	6	55336432	55348555	+	12124	-8.12852	2.23923e-08	4.03914e-06	0	0	0	0	27.0014	88.6273	38.7986	60.5906	0	0	0	0	21	71	90	56	down
ENSMUSG00000004730.14	Adgre1	17	57358686	57483529	+	124844	-8.68999	0.000152978	0.0180469	0	0	0	0	227.583	82.3859	7.32863	0	0	0	0	0	177	66	17	0	down
ENSMUSG00000005413.8	Hmox1	8	75093621	75100589	+	6969	-1.52748	0.0134945	0.457325	301.651	74.388	84.0449	126.167	405.02	142.303	668.629	478.233	474	56	62	122	315	114	1551	442	down
ENSMUSG00000006219.12	Fblim1	4	141576062	141606096	-	30035	-2.41713	0.0392539	0.737857	110.096	0	12.2001	18.6149	150.436	385.716	162.523	59.5086	173	0	9	18	117	309	377	55	down
ENSMUSG00000006356.10	Crip2	12	113140236	113145506	+	5271	-1.61918	0.0110623	0.412033	99.9139	146.119	206.046	174.773	196.724	167.268	1130.76	426.298	157	110	152	169	153	134	2623	394	down
ENSMUSG00000006395.16	Hyi	4	118359990	118362744	+	2755	-3.228	0.0340141	0.708645	7.63673	0	0	4.13663	2.57156	24.9654	52.5937	34.6232	12	0	0	4	2	20	122	32	down
ENSMUSG00000006517.5	Mvd	8	122433601	122443422	-	9822	-2.28286	0.041302	0.741659	158.462	200.582	43.378	2.06832	73.2894	79.8894	1210.95	603.742	249	151	32	2	57	64	2809	558	down
ENSMUSG00000006638.14	Abhd1	5	30950066	30955091	+	5026	-8.20447	0.000160479	0.0187734	0	0	0	0	0	52.4274	71.1308	102.788	0	0	0	0	0	42	165	95	down
ENSMUSG00000006651.8	Aplp1	7	30434982	30445535	-	10554	-7.31201	0.0269313	0.650235	0	0	0	0	0	0	13.7951	108.197	0	0	0	0	0	0	32	100	down
ENSMUSG00000006728.12	Cdk4	10	127063534	127067920	+	4387	-1.454	0.0479336	0.771951	2263.02	656.209	394.469	515.011	1010.62	577.95	3960.48	4943.54	3556	494	291	498	786	463	9187	4569	down
ENSMUSG00000007041.9	Clic1	17	35049966	35058749	+	8784	-2.10755	0.0120891	0.436128	3033.69	456.955	771.315	803.541	996.479	800.142	11825.4	8212.19	4767	344	569	777	775	641	27431	7590	down
ENSMUSG00000007440.10	Pcdha11	18	37005203	37187657	+	182455	-22.1608	5.91483e-11	4.13432e-08	0	0	0	0	0	0	148.728	0	0	0	0	0	0	0	345	0	down
ENSMUSG00000007872.3	Id3	4	136143497	136145755	+	2259	-1.58162	0.046528	0.7686	469.659	832.88	723.871	443.654	505.311	134.813	2551.66	4199.14	738	627	534	429	393	108	5919	3881	down
ENSMUSG00000008035.12	Mid1ip1	X	10715013	10719690	+	4678	-2.18577	0.0204487	0.574292	427.657	91.6567	108.445	61.0154	199.296	124.827	335.392	2478.8	672	69	80	59	155	100	778	2291	down
ENSMUSG00000008384.8	Sertad1	7	27486910	27490316	+	3407	-1.85673	0.0164445	0.517302	115.187	95.6418	119.29	42.4005	131.149	46.1861	597.067	573.447	181	72	88	41	102	37	1385	530	down
ENSMUSG00000009185.2	Ccl8	11	82115185	82116799	+	1615	-8.52438	0.00412944	0.225939	0	0	0	0	66.8605	215.951	0	0	0	0	0	0	52	173	0	0	down
ENSMUSG00000009248.6	Ascl2	7	142966829	142969264	-	2436	-6.71654	0.000490016	0.0480442	0	0	0	0	25.7156	39.9447	5.60424	9.73777	0	0	0	0	20	32	13	9	down
ENSMUSG00000009614.16	Sardh	2	27188393	27248337	-	59945	-6.53458	0.00980583	0.388218	0	0	5.42225	0	0	0	367.725	119.017	0	0	4	0	0	0	853	110	down
ENSMUSG00000009654.4	Oit3	10	59422958	59441778	-	18821	-3.7131	0.00234816	0.155574	61.0938	53.1343	0	64.1178	20.5725	109.848	937.202	1274.57	96	40	0	62	16	88	2174	1178	down
ENSMUSG00000009687.14	Fxyd5	7	31032722	31042481	-	9760	-24.537	4.12313e-13	7.68524e-10	0	0	0	0	343.303	518.033	0	0	0	0	0	0	267	415	0	0	down
ENSMUSG00000010142.12	Tnfrsf13b	11	61126755	61149372	+	22618	-7.35406	0.0229599	0.596595	0	0	0	0	60.4316	0	65.0954	0	0	0	0	0	47	0	151	0	down
ENSMUSG00000010358.13	Ifi35	11	101448407	101458698	+	10292	-1.48838	0.0141446	0.471357	118.369	22.5821	55.5781	48.6054	97.7192	171.013	163.816	259.674	186	17	41	47	76	137	380	240	down
ENSMUSG00000010406.11	Mrpl52	14	54426909	54429756	+	2848	-1.52319	0.0132705	0.456812	339.834	115.567	115.223	136.509	288.015	177.255	921.683	648.103	534	87	85	132	224	142	2138	599	down
ENSMUSG00000010751.15	Tnfrsf22	7	143634806	143649661	-	14856	-4.73814	0.00343368	0.201685	0	0	0	9.30743	30.8587	14.9793	115.103	88.7219	0	0	0	9	24	12	267	82	down
ENSMUSG00000011158.8	Brf1	12	112960085	113000704	-	40620	-1.24978	0.0494682	0.784136	144.461	23.9104	135.556	97.2109	118.292	169.765	287.11	379.773	227	18	100	94	92	136	666	351	down
ENSMUSG00000011256.16	Adam19	11	46055992	46147343	+	91352	-6.82865	0.0109626	0.41149	0	0	0	0	30.8587	9.98618	0	46.5249	0	0	0	0	24	8	0	43	down
ENSMUSG00000011306.7	Sugp1	8	70042813	70072347	+	29535	-1.24177	0.0479554	0.771951	33.7289	100.955	189.779	237.856	195.438	225.937	472.481	432.79	53	76	140	230	152	181	1096	400	down
ENSMUSG00000011632.7	Pinlyp	7	24541658	24546118	-	4461	-1.39061	0.000204416	0.0230455	358.29	367.955	199.268	365.058	702.035	680.308	620.778	1383.85	563	277	147	353	546	545	1440	1279	down
ENSMUSG00000013698.12	Pea15a	1	172196728	172206804	-	10077	-3.33019	0.0186451	0.546435	35.6381	0	0	173.739	252.013	176.006	1045.84	634.037	56	0	0	168	196	141	2426	586	down
ENSMUSG00000014226.10	Cacybp	1	160202367	160212875	-	10509	-1.39465	0.0411498	0.740922	1391.79	395.851	241.29	183.046	694.321	795.149	1743.78	2587	2187	298	178	177	540	637	4045	2391	down
ENSMUSG00000015013.9	Trappc2l	8	122611640	122616660	+	5021	-1.41525	0.00493651	0.253665	880.133	519.388	284.668	336.102	894.902	646.605	1617.04	2233.2	1383	391	210	325	696	518	3751	2064	down
ENSMUSG00000015133.17	Lrrk1	7	66226912	66388350	-	161439	-2.1284	0.0303989	0.676691	10.1823	54.4627	20.3334	39.298	16.7151	31.2068	344.014	148.231	16	41	15	38	13	25	798	137	down
ENSMUSG00000015134.15	Aldh1a3	7	66390890	66427517	-	36628	-3.21998	0.00116621	0.0956193	77.0037	104.94	203.334	288.53	173.58	144.8	5452.07	504.2	121	79	150	279	135	116	12647	466	down
ENSMUSG00000015214.14	Mtmr1	X	71364760	71419196	+	54437	-5.0596	0.00101629	0.0850734	0	0	13.5556	0	30.8587	94.8687	193.993	116.853	0	0	10	0	24	76	450	108	down
ENSMUSG00000015312.9	Gadd45b	10	80930073	80932204	+	2132	-1.2557	0.0373197	0.730958	94.8227	108.925	169.445	204.763	168.437	114.841	494.036	600.496	149	82	125	198	131	92	1146	555	down
ENSMUSG00000015542.17	Nat9	11	115182832	115187859	-	5028	-2.67699	3.02393e-05	0.00440344	66.185	43.8358	47.4447	19.649	117.006	131.069	372.467	513.938	104	33	35	19	91	105	864	475	down
ENSMUSG00000015852.13	Fcrls	3	87250758	87263738	-	12981	-24.3921	5.65555e-13	9.88272e-10	0	0	0	0	284.157	485.578	0	0	0	0	0	0	221	389	0	0	down
ENSMUSG00000015947.10	Fcgr1	3	96282909	96293969	-	11061	-3.44178	0.0113751	0.418468	0	37.194	21.689	6.20495	388.305	280.861	11.6396	21.6395	0	28	16	6	302	225	27	20	down
ENSMUSG00000016024.9	Lbp	2	158306493	158332852	+	26360	-1.01066	0.00219568	0.14867	125.37	253.716	254.846	154.09	411.449	415.675	363.414	391.675	197	191	188	149	320	333	843	362	down
ENSMUSG00000016252.7	Atp5e	2	174461072	174464105	-	3034	-1.15863	0.022106	0.590757	1503.8	770.448	650.67	639.11	970.763	953.68	2595.63	3438.52	2363	580	480	618	755	764	6021	3178	down
ENSMUSG00000016458.14	Wt1	2	105126529	105173616	+	47088	-7.225	0.0301943	0.675729	0	0	0	0	0	0	14.2262	100.624	0	0	0	0	0	0	33	93	down
ENSMUSG00000016493.13	Cd46	1	195036826	195092249	-	55424	-6.75683	0.046058	0.765143	0	0	0	0	0	0	52.5937	30.2953	0	0	0	0	0	0	122	28	down
ENSMUSG00000016528.10	Mapkapk2	1	131053700	131097826	-	44127	-2.35434	0.0473974	0.771747	143.189	42.5075	0	5.17079	108.005	198.475	362.983	310.527	225	32	0	5	84	159	842	287	down
ENSMUSG00000017466.9	Timp2	11	118301069	118355740	-	54672	-3.69829	0.0208454	0.578444	120.915	0	0	4.13663	392.163	1052.29	165.541	22.7215	190	0	0	4	305	843	384	21	down
ENSMUSG00000017724.14	Etv4	11	101769742	101785371	-	15630	-20.9932	5.698e-10	1.50348e-07	0	0	0	0	0	0	90.9612	0	0	0	0	0	0	0	211	0	down
ENSMUSG00000017734.15	Dbndd2	2	164486106	164493319	+	7214	-4.94928	0.0164947	0.517509	7.00034	0	0	0	0	112.344	76.3039	40.0331	11	0	0	0	0	90	177	37	down
ENSMUSG00000017754.13	Pltp	2	164839518	164857711	-	18194	-7.24592	0.000236931	0.0263918	5.72755	0	0	0	235.298	682.805	16.8127	0	9	0	0	0	183	547	39	0	down
ENSMUSG00000017760.15	Ctsa	2	164832873	164841032	+	8160	-1.06021	0.00462774	0.243214	792.311	294.895	397.18	707.364	1202.2	1273.24	1273.03	827.711	1245	222	293	684	935	1020	2953	765	down
ENSMUSG00000018008.7	Cyth4	15	78597047	78622019	+	24973	-7.02513	0.0380365	0.734217	0	0	0	0	93.8619	6.24136	0	0	0	0	0	0	73	5	0	0	down
ENSMUSG00000018167.10	Stard3	11	98358368	98381112	+	22745	-1.58138	0.0307714	0.679552	75.0945	49.1492	208.757	36.1955	84.8614	171.013	366.862	479.315	118	37	154	35	66	137	851	443	down
ENSMUSG00000018387.12	Shroom1	11	53457205	53467766	+	10562	-8.14457	0.000257332	0.0281922	0	0	0	0	109.291	0	81.9082	25.9674	0	0	0	0	85	0	190	24	down
ENSMUSG00000018570.17	2810408A11Rik	11	69897352	69900987	-	3636	-6.95288	0.0400695	0.7394	0	0	0	0	0	0	62.5089	32.4592	0	0	0	0	0	0	145	30	down
ENSMUSG00000018770.9	Atp5g3	2	73908447	73911326	-	2880	-1.25967	0.0285317	0.669225	3545.99	925.865	741.493	978.314	2671.85	1640.23	5194.7	5323.32	5572	697	547	946	2078	1314	12050	4920	down
ENSMUSG00000018774.13	Cd68	11	69664213	69666153	-	1941	-2.34758	0.00237002	0.156281	262.194	488.836	181.645	428.142	2007.1	4272.83	403.506	243.444	412	368	134	414	1561	3423	936	225	down
ENSMUSG00000018927.3	Ccl6	11	83587882	83593087	-	5206	-5.99912	0.0100893	0.394142	0	62.4328	0	54.8104	3340.45	4124.29	25.4346	4.3279	0	47	0	53	2598	3304	59	4	down
ENSMUSG00000018932.9	Map2k3	11	60932033	60952811	+	20779	-3.80764	0.000886857	0.0760603	5.09115	67.7463	12.2001	0	109.291	128.572	505.244	438.2	8	51	9	0	85	103	1172	405	down
ENSMUSG00000019055.15	Plod1	4	147909753	147936767	-	27015	-1.13674	0.00984465	0.388218	338.562	251.06	403.958	312.316	334.303	478.088	847.965	1209.65	532	189	298	302	260	383	1967	1118	down
ENSMUSG00000019122.8	Ccl9	11	83572919	83578636	-	5718	-26.6161	3.64514e-15	2.54786e-11	0	0	0	0	1383.5	2794.88	0	0	0	0	0	0	1076	2239	0	0	down
ENSMUSG00000019214.13	Chtf18	17	25718926	25727419	-	8494	-2.44578	0.012424	0.440255	28.6377	31.8806	82.6893	9.30743	83.5756	78.6411	37.9364	628.627	45	24	61	9	65	63	88	581	down
ENSMUSG00000019301.5	Hsd17b1	11	101078411	101080527	+	2117	-4.18837	0.00805814	0.348851	138.098	79.7015	230.446	299.906	43.7165	9.98618	1686.88	11899.6	217	60	170	290	34	8	3913	10998	down
ENSMUSG00000019731.13	Slc35e1	8	72480641	72492614	-	11974	-4.50782	0.039679	0.737857	0	21.2537	0	0	0	19.9724	248.742	209.903	0	16	0	0	0	16	577	194	down
ENSMUSG00000019774.8	Mtrf1l	10	5811887	5823910	-	12024	-1.98976	0.00424852	0.229233	28.0013	47.8209	24.4001	16.5465	135.007	38.6964	215.979	71.4103	44	36	18	16	105	31	501	66	down
ENSMUSG00000019863.7	Qrsl1	10	43874188	43901745	-	27558	-1.33182	0.0222902	0.591284	39.4564	94.3134	56.9337	46.5371	87.433	99.8618	115.534	292.133	62	71	42	45	68	80	268	270	down
ENSMUSG00000019874.11	Fabp7	10	57784881	57788450	+	3570	-2.186	0.0111444	0.413678	220.192	37.194	66.4226	171.67	137.578	133.565	1592.9	392.757	346	28	49	166	107	107	3695	363	down
ENSMUSG00000019889.10	Ptprk	10	28074820	28597397	+	522578	-1.38685	0.0175513	0.533144	91.0044	38.5224	119.29	201.661	162.008	233.427	486.276	295.379	143	29	88	195	126	187	1128	273	down
ENSMUSG00000019987.9	Arg1	10	24915221	24927484	-	12264	-10.4231	0.00206719	0.144926	0	0	0	0	32.1445	1018.59	3.44877	0	0	0	0	0	25	816	8	0	down
ENSMUSG00000020009.12	Ifngr1	10	19591949	19610229	+	18281	-3.19519	0.00841283	0.355988	129.824	5.31343	21.689	0	84.8614	360.751	550.94	447.938	204	4	16	0	66	289	1278	414	down
ENSMUSG00000020027.18	Socs2	10	95385362	95417180	-	31819	-2.87683	0.000350011	0.0365148	573.391	146.119	59.6448	286.462	546.456	549.24	1740.33	5000.89	901	110	44	277	425	440	4037	4622	down
ENSMUSG00000020032.14	Nuak1	10	84370905	84440597	-	69693	-6.40939	0.0182196	0.537944	0	0	0	0	0	33.7033	22.8481	8.6558	0	0	0	0	0	27	53	8	down
ENSMUSG00000020044.13	Timp3	10	86300372	86349506	+	49135	-3.34155	0.0346886	0.715762	74.4581	5.31343	5.42225	8.27327	0	14.9793	875.555	61.6726	117	4	4	8	0	12	2031	57	down
ENSMUSG00000020053.18	Igf1	10	87858265	87937042	+	78778	-2.33278	0.023718	0.607262	661.214	15.9403	199.268	176.841	151.722	177.255	1919.24	3061.99	1039	12	147	171	118	142	4452	2830	down
ENSMUSG00000020087.5	Tysnd1	10	61695514	61702773	+	7260	-2.08534	0.000794866	0.0703281	56.0027	43.8358	74.556	24.8198	77.1467	137.31	375.053	253.182	88	33	55	24	60	110	870	234	down
ENSMUSG00000020099.8	Unc5b	10	60762593	60831581	-	68989	-20.893	7.02571e-10	1.71776e-07	0	0	0	0	0	0	58.1979	0	0	0	0	0	0	0	135	0	down
ENSMUSG00000020133.8	2310011J03Rik	10	80318254	80320537	-	2284	-1.5761	0.0280173	0.662721	112.642	26.5672	264.335	178.909	165.866	233.427	651.817	683.808	177	20	195	173	129	187	1512	632	down
ENSMUSG00000020155.2	Kcnmb1	11	33963013	33973641	+	10629	-6.73541	0.0467558	0.768666	0	0	0	0	0	29.9585	51.7315	0	0	0	0	0	0	24	120	0	down
ENSMUSG00000020163.12	Uqcr11	10	80402997	80406830	-	3834	-1.31299	0.00186082	0.133883	3178.15	1580.75	2650.13	1685.68	2633.28	4748.43	5467.16	9749.68	4994	1190	1955	1630	2048	3804	12682	9011	down
ENSMUSG00000020300.14	Cpeb4	11	31872211	31935634	+	63424	-2.06576	0.014565	0.48135	332.834	540.642	187.068	264.745	307.301	4515	336.255	390.593	523	407	138	256	239	3617	780	361	down
ENSMUSG00000020363.6	Gfpt2	11	49794178	49838613	+	44436	-2.48457	0.00488628	0.251594	982.593	276.298	389.047	358.853	258.442	290.847	5903.85	4781.25	1544	208	287	347	201	233	13695	4419	down
ENSMUSG00000020423.6	Btg2	1	134075170	134079120	-	3951	-1.11233	0.0229322	0.596428	4071.65	2719.15	2467.12	2264.81	2997.15	2794.88	6549.21	12571.5	6398	2047	1820	2190	2331	2239	15192	11619	down
ENSMUSG00000020476.14	Dbnl	11	5788488	5800962	+	12475	-2.1358	0.0092012	0.372835	241.193	127.522	97.6005	73.4253	429.45	29.9585	972.121	942.4	379	96	72	71	334	24	2255	871	down
ENSMUSG00000020477.10	Mrps24	11	5703983	5715680	-	11698	-1.01272	0.0424331	0.749929	777.674	306.851	336.18	262.676	568.314	443.137	1033.34	1354.63	1222	231	248	254	442	355	2397	1252	down
ENSMUSG00000020697.16	Lig3	11	82781108	82804274	+	23167	-1.3401	0.0338642	0.708491	278.741	273.642	1815.1	326.794	1787.23	1143.42	1968.81	1917.26	438	206	1339	316	1390	916	4567	1772	down
ENSMUSG00000020709.15	Adap2	11	80154105	80178958	+	24854	-7.66353	0.0175824	0.533144	0	0	0	0	33.4303	122.331	0	0	0	0	0	0	26	98	0	0	down
ENSMUSG00000020737.12	Jpt1	11	115497353	115514387	-	17035	-1.20466	0.0328502	0.701114	3166.7	1825.16	1668.7	2387.87	2881.43	1280.73	5821.52	10872.8	4976	1374	1231	2309	2241	1026	13504	10049	down
ENSMUSG00000020808.3	Pimreg	11	72042032	72047370	+	5339	-10.174	0.00075965	0.0677112	0	0	0	0	0	49.9309	116.396	720.595	0	0	0	0	0	40	270	666	down
ENSMUSG00000020812.17	1810032O08Rik	11	116671660	116675799	+	4140	-3.72594	0.0292946	0.672588	0	0	12.2001	0	25.7156	47.4343	29.3145	54.0987	0	0	9	0	20	38	68	50	down
ENSMUSG00000020814.13	Mxra7	11	116803062	116828046	-	24985	-6.91513	2.2813e-06	0.000377413	2.54558	0	0	0	33.4303	14.9793	197.873	133.083	4	0	0	0	26	12	459	123	down
ENSMUSG00000020899.15	Pfas	11	68985697	69008460	-	22764	-2.05617	0.0426252	0.75006	25.4558	6.64179	55.5781	64.1178	36.0018	18.7241	181.06	394.921	40	5	41	62	28	15	420	365	down
ENSMUSG00000020901.13	Pik3r5	11	68432121	68497849	+	65729	-8.0828	0.00929435	0.374439	0	0	0	0	36.0018	172.262	0	0	0	0	0	0	28	138	0	0	down
ENSMUSG00000020926.16	Adam11	11	102761439	102780262	+	18824	-6.90596	0.0414388	0.742684	0	0	0	0	48.8596	0	0	43.279	0	0	0	0	38	0	0	40	down
ENSMUSG00000021054.6	Sgpp1	12	75714249	75735729	-	21481	-2.25995	0.000174517	0.0200795	120.278	74.388	269.757	142.714	261.013	368.24	1123.44	1151.22	189	56	199	138	203	295	2606	1064	down
ENSMUSG00000021070.6	Bdkrb2	12	105563226	105595237	+	32012	-21.9913	8.24215e-11	5.00962e-08	0	0	0	0	0	0	161.23	0	0	0	0	0	0	0	374	0	down
ENSMUSG00000021213.12	Akr1c13	13	4191150	4205596	+	14447	-8.05504	0.00895729	0.366672	0	0	0	0	0	54.924	0	149.313	0	0	0	0	0	44	0	138	down
ENSMUSG00000021250.13	Fos	12	85473890	85477273	+	3384	-4.90483	0.000244238	0.0268844	732.49	19.9254	211.468	173.739	1812.95	520.529	4201.89	27562.2	1151	15	156	168	1410	417	9747	25474	down
ENSMUSG00000021265.3	Slc25a29	12	108825873	108835883	-	10011	-6.65424	0.0107146	0.409248	0	0	0	0	15.4293	0	40.0919	21.6395	0	0	0	0	12	0	93	20	down
ENSMUSG00000021379.2	Id4	13	48261228	48266026	+	4799	-1.70942	0.00699579	0.319213	26.0922	31.8806	20.3334	22.7515	126.006	29.9585	58.1979	116.853	41	24	15	22	98	24	135	108	down
ENSMUSG00000021453.2	Gadd45g	13	51846678	51848468	+	1791	-3.75652	0.00722573	0.323757	22.9102	33.2089	0	0	36.0018	51.1791	334.53	337.576	36	25	0	0	28	41	776	312	down
ENSMUSG00000021457.14	Syk	13	52583173	52648792	+	65620	-7.52459	3.58771e-06	0.000586601	0	0	0	0	46.288	16.2275	59.0601	19.4755	0	0	0	0	36	13	137	18	down
ENSMUSG00000021477.9	Ctsl	13	64359337	64370890	-	11554	-1.41193	0.0309149	0.679911	9846.93	1875.64	2433.24	3180.04	4354.93	4346.48	21534.1	15897.5	15473	1412	1795	3075	3387	3482	49952	14693	down
ENSMUSG00000021497.10	Txndc15	13	55714650	55726227	+	11578	-1.32927	0.0293559	0.672588	444.203	320.134	253.49	287.496	351.018	198.475	1335.53	1394.67	698	241	187	278	273	159	3098	1289	down
ENSMUSG00000021701.8	Plk2	13	110395046	110400844	+	5799	-2.02998	0.0450544	0.76291	11.4551	39.8507	170.801	102.382	273.871	26.2137	899.266	122.263	18	30	126	99	213	21	2086	113	down
ENSMUSG00000021904.5	Sema3g	14	31217860	31230350	+	12491	-7.05782	0.0353431	0.718532	0	0	0	0	0	0	29.7456	72.4923	0	0	0	0	0	0	69	67	down
ENSMUSG00000021910.15	Nisch	14	31170930	31216946	-	46017	-1.19527	0.044403	0.759769	1036.05	197.925	290.091	266.813	518.169	756.453	1207.93	1622.96	1628	149	214	258	403	606	2802	1500	down
ENSMUSG00000021919.7	Chat	14	32408203	32465909	-	57707	-19.8946	4.22009e-09	7.97226e-07	0	0	0	0	0	0	112.516	0	0	0	0	0	0	0	261	0	down
ENSMUSG00000021939.8	Ctsb	14	63122462	63145923	+	23462	-1.61653	3.58338e-05	0.00505062	5609.81	1684.36	2076.72	3039.39	8007.83	11954.7	10070.8	8032.58	8815	1268	1532	2939	6228	9577	23361	7424	down
ENSMUSG00000021948.16	Prkcd	14	30595354	30626210	-	30857	-1.35833	0.00161875	0.122161	454.385	286.925	298.224	392.98	794.612	359.502	1304.5	1215.06	714	216	220	380	618	288	3026	1123	down
ENSMUSG00000021950.15	Anxa8	14	34085981	34100571	+	14591	-22.0744	7.00047e-11	4.55177e-08	0	0	0	0	0	0	160.368	0	0	0	0	0	0	0	372	0	down
ENSMUSG00000022025.13	Cnmd	14	79637690	79662170	-	24481	-3.03717	0.000554945	0.0528225	134.916	168.701	162.668	72.3911	78.4325	239.668	873.4	3228.61	212	127	120	70	61	192	2026	2984	down
ENSMUSG00000022032.14	Scara5	14	65666403	65764826	+	98424	-8.98782	2.3484e-05	0.00345573	0	0	0	0	63.0032	0	50.8693	275.904	0	0	0	0	49	0	118	255	down
ENSMUSG00000022106.14	Rcbtb2	14	73123037	73207843	+	84807	-1.39826	9.32754e-05	0.0119082	378.018	176.672	492.069	500.533	898.76	1056.04	960.912	1164.21	594	133	363	484	699	846	2229	1076	down
ENSMUSG00000022125.6	Cln5	14	103070216	103077579	+	7364	-1.04764	0.0404754	0.740452	404.747	159.403	136.912	166.5	284.157	297.089	758.728	455.511	636	120	101	161	221	238	1760	421	down
ENSMUSG00000022175.8	Lrp10	14	54464164	54471497	+	7334	-1.01197	0.0164731	0.517497	409.201	294.895	191.134	318.521	388.305	365.744	848.396	846.104	643	222	141	308	302	293	1968	782	down
ENSMUSG00000022178.10	Ajuba	14	54567469	54577661	-	10193	-3.19966	0.00919115	0.372835	0	21.2537	5.42225	11.3757	72.0036	22.4689	218.997	31.3773	0	16	4	11	56	18	508	29	down
ENSMUSG00000022193.6	Psmb5	14	54614120	54617995	-	3876	-1.34557	0.0375372	0.730958	2241.38	504.776	586.959	933.845	1193.2	835.094	4489.43	4328.98	3522	380	433	903	928	669	10414	4001	down
ENSMUSG00000022203.6	Efs	14	54916543	54926788	-	10246	-6.71079	0.0475691	0.771747	0	0	0	0	0	53.6757	26.7279	0	0	0	0	0	0	43	62	0	down
ENSMUSG00000022351.14	Sqle	15	59315077	59331192	+	16116	-1.31088	0.0274572	0.656371	873.769	1190.21	1065.47	618.427	933.476	570.46	3952.28	3838.85	1373	896	786	598	726	457	9168	3548	down
ENSMUSG00000022367.7	Has2	15	56665627	56694539	-	28913	-3.19651	0.0079871	0.347296	128.552	0	63.7115	39.298	113.149	48.6826	580.686	1384.93	202	0	47	38	88	39	1347	1280	down
ENSMUSG00000022372.14	Sla	15	66780819	66831829	-	51011	-3.59517	0.0349383	0.717737	17.819	0	0	0	74.5752	32.4551	18.5371	97.3777	28	0	0	0	58	26	43	90	down
ENSMUSG00000022378.13	Fam49b	15	63929097	64060448	-	131352	-1.7405	0.0395621	0.737857	797.402	155.418	92.1783	204.763	191.581	289.599	1817.07	1881.55	1253	117	68	198	149	232	4215	1739	down
ENSMUSG00000022408.6	Fam83f	15	80671847	80700420	+	28574	-7.29277	0.00384787	0.217454	0	0	0	0	66.8605	21.2206	0	32.4592	0	0	0	0	52	17	0	30	down
ENSMUSG00000022485.3	Hoxc5	15	102967443	103017429	+	49987	-6.09598	0.0309809	0.680196	0	0	0	0	9.00045	0	22.8481	20.5575	0	0	0	0	7	0	53	19	down
ENSMUSG00000022503.10	Nubp1	16	10411948	10424428	+	12481	-1.19504	0.0421596	0.749127	225.92	196.597	108.445	200.627	124.721	220.944	682.856	645.939	355	148	80	194	97	177	1584	597	down
ENSMUSG00000022561.12	Gpaa1	15	76331231	76334907	+	3677	-1.87543	0.00114109	0.0938347	75.0945	151.433	128.778	240.959	291.872	220.944	703.548	968.368	118	114	95	233	227	177	1632	895	down
ENSMUSG00000022570.5	Tsta3	15	75924684	75929730	-	5047	-1.64868	0.0290912	0.671488	414.929	38.5224	184.357	78.596	246.87	254.647	929.873	817.973	652	29	136	76	192	204	2157	756	down
ENSMUSG00000022613.8	Miox	15	89334398	89337015	+	2618	-1.04394	0.00720869	0.323757	13233.2	11032	11581.9	11878.3	15047.5	11592.7	35803.4	35957.3	20794	8305	8544	11486	11703	9287	83052	33233	down
ENSMUSG00000022667.17	Cd200r1	16	44765736	44794978	+	29243	-8.16179	0.00812703	0.350092	0	0	0	0	181.295	38.6964	0	0	0	0	0	0	141	31	0	0	down
ENSMUSG00000022759.13	Lrrc74b	16	17544465	17561247	-	16783	-21.1033	4.69557e-10	1.39663e-07	0	0	0	0	0	0	0	68.1644	0	0	0	0	0	0	0	63	down
ENSMUSG00000022817.14	Itgb5	16	33829665	33949153	+	119489	-2.09363	0.0100374	0.393599	758.582	511.418	386.335	1046.57	563.171	297.089	7644.19	3031.69	1192	385	285	1012	438	238	17732	2802	down
ENSMUSG00000022853.6	Ehhadh	16	21761287	21787844	-	26558	-21.507	2.14842e-10	9.83688e-08	0	0	0	0	0	92.3721	0	0	0	0	0	0	0	74	0	0	down
ENSMUSG00000022893.14	Adamts1	16	85793827	85803113	-	9287	-7.28925	6.30266e-14	2.2027e-10	2.54558	0	8.13338	0	498.882	642.86	387.986	89.8039	4	0	6	0	388	515	900	83	down
ENSMUSG00000022901.13	Cd86	16	36603869	36666081	-	62213	-8.28679	0.00641196	0.301805	0	0	0	0	50.1454	189.737	0	0	0	0	0	0	39	152	0	0	down
ENSMUSG00000022978.11	Mis18a	16	90719312	90727404	-	8093	-1.08464	0.00122037	0.0988998	11879.6	14368.8	15041.3	5843	32194.6	18952.5	27337.9	21472.9	18667	10817	11096	5650	25039	15183	63415	19846	down
ENSMUSG00000023000.4	Dhh	15	98893031	98898540	-	5510	-8.49015	0.000261428	0.0284407	0	0	0	0	5.14312	0	100.876	169.87	0	0	0	0	4	0	234	157	down
ENSMUSG00000023009.14	Nckap5l	15	99422035	99457748	-	35714	-7.31919	0.0240678	0.612851	0	0	0	0	0	0	39.2297	83.3121	0	0	0	0	0	0	91	77	down
ENSMUSG00000023013.4	Aqp2	15	99579056	99584545	+	5490	-21.4128	2.58057e-10	1.12377e-07	0	0	0	0	0	0	85.788	0	0	0	0	0	0	0	199	0	down
ENSMUSG00000023045.12	Soat2	15	102150526	102163474	+	12949	-22.0367	7.57149e-11	4.81117e-08	0	0	0	0	137.578	0	0	0	0	0	0	0	107	0	0	0	down
ENSMUSG00000023087.15	Noct	3	51224447	51251644	+	27198	-2.14073	0.00143189	0.111516	962.864	2179.84	6615.15	3506.83	20445.2	19795.1	2276.19	15975.4	1513	1641	4880	3391	15901	15858	5280	14765	down
ENSMUSG00000023104.9	Rfc2	5	134581366	134601805	+	20440	-1.56884	0.00289871	0.18365	433.384	120.881	123.356	227.515	506.597	435.647	616.036	1133.91	681	91	91	220	394	349	1429	1048	down
ENSMUSG00000023473.12	Celsr3	9	108826320	108852969	+	26650	-5.37583	0.0298959	0.67499	0.636394	0	0	0	15.4293	19.9724	0	17.3116	1	0	0	0	12	16	0	16	down
ENSMUSG00000023707.13	Ogfod2	5	124112297	124115483	+	3187	-1.2917	0.0177712	0.533144	49.0024	77.0448	69.1337	34.1272	115.72	61.1653	198.304	182.854	77	58	51	33	90	49	460	169	down
ENSMUSG00000023832.13	Acat2	17	12942890	12960747	-	17858	-1.44341	0.0427468	0.750728	783.401	318.806	467.669	334.033	414.021	225.937	2941.8	1595.91	1231	240	345	323	322	181	6824	1475	down
ENSMUSG00000023905.14	Tnfrsf12a	17	23675447	23677449	-	2003	-1.86691	0.011293	0.416546	843.222	297.552	260.268	642.212	633.889	329.544	4632.98	1857.75	1325	224	192	621	493	264	10747	1717	down
ENSMUSG00000023913.17	Pla2g7	17	43568098	43612201	+	44104	-7.76958	0.0182968	0.539053	0	0	0	5.17079	182.581	949.935	0	0	0	0	0	5	142	761	0	0	down
ENSMUSG00000023918.12	Adgrf4	17	42656891	42692284	-	35394	-6.99154	0.0389704	0.737203	0	0	0	0	88.7188	0	9.05301	0	0	0	0	0	69	0	21	0	down
ENSMUSG00000023932.8	Cdc5l	17	45391892	45433707	-	41816	-1.67042	0.0489487	0.779361	448.658	37.194	54.2225	107.552	192.867	197.227	647.075	1028.96	705	28	40	104	150	158	1501	951	down
ENSMUSG00000023965.13	Fbxl17	17	63057452	63500017	-	442566	-3.93588	3.59481e-05	0.00505062	215.101	123.537	140.979	221.31	162.008	127.324	5989.64	4451.24	338	93	104	214	126	102	13894	4114	down
ENSMUSG00000023973.13	Cnpy3	17	46735705	46752214	-	16510	-1.34463	0.031043	0.680196	94.1863	57.1194	233.157	104.45	131.149	199.724	596.636	310.527	148	43	172	101	102	160	1384	287	down
ENSMUSG00000023991.16	Foxp4	17	47867133	47924645	-	57513	-1.5533	0.0376995	0.730958	84.6404	37.194	46.0891	16.5465	47.5738	66.1584	248.742	179.608	133	28	34	16	37	53	577	166	down
ENSMUSG00000023992.14	Trem2	17	48346401	48354147	+	7747	-24.0402	1.20515e-12	1.46499e-09	0	0	0	0	389.591	666.577	0	0	0	0	0	0	303	534	0	0	down
ENSMUSG00000024007.14	Ppil1	17	29250803	29264158	-	13356	-2.10804	0.00305465	0.189434	127.915	156.746	93.5339	40.3322	289.3	76.1446	584.135	853.678	201	118	69	39	225	61	1355	789	down
ENSMUSG00000024013.14	Fgd2	17	29360914	29379660	+	18747	-7.84652	0.000871315	0.0754214	0	0	0	0	78.4325	48.6826	0	49.7708	0	0	0	0	61	39	0	46	down
ENSMUSG00000024018.17	Ccdc167	17	29689378	29717012	-	27635	-2.17419	1.48862e-05	0.00227434	39.4564	50.4776	48.8003	28.9564	136.293	126.075	151.315	340.822	62	38	36	28	106	101	351	315	down
ENSMUSG00000024074.7	Crim1	17	78200248	78376592	+	176345	-3.13582	0.00334286	0.200055	123.46	106.269	16.2668	6.20495	239.155	21.2206	911.767	1047.35	194	80	12	6	186	17	2115	968	down
ENSMUSG00000024088.3	4930583I09Rik	17	64832523	64836071	-	3549	-1.1277	0.000378445	0.0389006	137.461	151.433	135.556	128.236	398.592	294.592	319.442	194.755	216	114	100	124	310	236	741	180	down
ENSMUSG00000024095.15	Hnrnpll	17	80029487	80062334	-	32848	-1.68325	0.0172102	0.52935	196.009	45.1642	73.2004	52.7421	140.15	136.062	257.795	649.185	308	34	54	51	109	109	598	600	down
ENSMUSG00000024142.14	Mlst8	17	24473550	24479078	-	5529	-1.37964	0.0255039	0.634398	42.002	138.149	120.645	35.1614	245.584	141.055	132.777	351.642	66	104	89	34	191	113	308	325	down
ENSMUSG00000024168.7	Tmem204	17	25057702	25081181	-	23480	-7.22015	0.032556	0.697924	0	0	0	0	33.4303	81.1377	0	0	0	0	0	0	26	65	0	0	down
ENSMUSG00000024294.13	Mib1	18	10725548	10818704	+	93157	-1.20603	0.000845792	0.0738984	790.402	301.537	322.624	490.191	984.907	1315.68	1076.88	1025.71	1242	227	238	474	766	1054	2498	948	down
ENSMUSG00000024300.16	Myo1f	17	33555719	33607764	+	52046	-7.80737	0.0132907	0.456812	0	0	0	0	79.7183	92.3721	0	0	0	0	0	0	62	74	0	0	down
ENSMUSG00000024327.15	Slc39a7	17	34028267	34031690	-	3424	-3.14512	0.000564395	0.0531311	223.374	19.9254	20.3334	136.509	522.026	97.3652	1470.9	1459.58	351	15	15	132	406	78	3412	1349	down
ENSMUSG00000024349.9	Tmem173	18	35733678	35740554	-	6877	-8.21334	1.90001e-08	3.4495e-06	0	0	0	0	27.0014	34.9516	85.3569	80.0661	0	0	0	0	21	28	198	74	down
ENSMUSG00000024352.11	Spata24	18	35656690	35662186	-	5497	-1.67042	0.0220353	0.590685	22.2738	54.4627	55.5781	23.7856	32.1445	76.1446	154.763	230.461	35	41	41	23	25	61	359	213	down
ENSMUSG00000024383.8	Map3k2	18	32163089	32236751	+	73663	-1.34599	0.0357244	0.720117	127.279	46.4925	23.0446	54.8104	83.5756	152.289	254.346	152.558	200	35	17	53	65	122	590	141	down
ENSMUSG00000024395.8	Lims2	18	31931325	31958619	+	27295	-21.2031	3.87336e-10	1.28923e-07	0	0	0	0	0	0	0	73.5743	0	0	0	0	0	0	0	68	down
ENSMUSG00000024397.14	Aif1	17	35170991	35176068	-	5078	-10.384	0.00214878	0.146531	0	0	0	0	239.155	785.163	1.72438	0	0	0	0	0	186	629	4	0	down
ENSMUSG00000024511.15	Rab27b	18	69979131	70141605	-	162475	-8.34527	0.000116896	0.0143978	0	0	0	0	46.288	0	128.467	74.6563	0	0	0	0	36	0	298	69	down
ENSMUSG00000024570.6	Rbfa	18	80192265	80200658	-	8394	-1.12266	0.0401883	0.739931	209.374	66.4179	96.245	108.587	262.299	121.082	441.011	223.969	329	50	71	105	204	97	1023	207	down
ENSMUSG00000024617.16	Camk2a	18	60925618	60988152	+	62535	-7.06619	0.00485568	0.250679	0	0	0	0	24.4298	17.4758	60.7845	0	0	0	0	0	19	14	141	0	down
ENSMUSG00000024620.11	Pdgfrb	18	61045150	61085061	+	39912	-20.9029	6.89394e-10	1.71776e-07	0	0	0	0	0	0	58.629	0	0	0	0	0	0	0	136	0	down
ENSMUSG00000024644.16	Cndp2	18	84667470	84685633	-	18164	-3.22759	0.000878097	0.0755407	41.3656	0	67.7782	163.397	435.879	615.398	1019.97	482.561	65	0	50	158	339	493	2366	446	down
ENSMUSG00000024672.11	Ms4a7	19	11321039	11336146	-	15108	-24.8386	2.12436e-13	4.2425e-10	0	0	0	0	519.455	549.24	0	0	0	0	0	0	404	440	0	0	down
ENSMUSG00000024677.13	Ms4a6b	19	11516512	11531256	+	14745	-9.35055	0.000760447	0.0677112	0	0	0	0	198.01	303.33	0	0	0	0	0	0	154	243	0	0	down
ENSMUSG00000024679.10	Ms4a6d	19	11586604	11604849	-	18246	-1.43513	0.0405708	0.740452	210.646	467.582	471.736	432.278	1368.07	2386.7	308.233	215.313	331	352	348	418	1064	1912	715	199	down
ENSMUSG00000024747.3	Aldh1a7	19	20692953	20727562	-	34610	-8.64014	7.01858e-05	0.00925624	0	0	0	0	36.0018	0	208.219	61.6726	0	0	0	0	28	0	483	57	down
ENSMUSG00000024772.9	Ehd1	19	6276725	6300096	+	23372	-2.20764	7.32826e-05	0.00961928	48.366	180.657	55.5781	89.9718	273.871	262.137	675.527	511.774	76	136	41	87	213	210	1567	473	down
ENSMUSG00000024776.17	Stambpl1	19	34192229	34240333	+	48105	-8.30335	1.43766e-09	2.99967e-07	0	0	0	0	81.0041	49.9309	36.212	75.7382	0	0	0	0	63	40	84	70	down
ENSMUSG00000024803.8	Ankrd1	19	36111965	36119844	-	7880	-22.9981	1.08166e-11	1.08008e-08	0	0	0	0	0	0	284.954	0	0	0	0	0	0	0	661	0	down
ENSMUSG00000025034.8	Trim8	19	46501648	46516444	+	14797	-1.84955	0.0225573	0.593301	399.656	74.388	71.8448	37.2297	362.59	136.062	920.389	687.054	628	56	53	36	282	109	2135	635	down
ENSMUSG00000025044.16	Msr1	8	39581685	39642673	-	60989	-3.31921	0.0207855	0.57836	0	30.5522	0	48.6054	289.3	374.482	72.4241	53.0168	0	23	0	47	225	300	168	49	down
ENSMUSG00000025157.8	Zdhhc16	19	41933480	41944104	+	10625	-1.20966	0.000402089	0.0406524	264.104	255.045	553.07	416.766	667.319	820.115	1085.07	865.58	415	192	408	403	519	657	2517	800	down
ENSMUSG00000025212.16	Sfxn3	19	45047576	45056383	+	8808	-1.73109	0.0261931	0.640096	382.473	146.119	187.068	108.587	384.448	77.3929	1688.6	586.43	601	110	138	105	299	62	3917	542	down
ENSMUSG00000025237.16	Parp6	9	59617284	59650285	+	33002	-1.04696	0.000560292	0.052923	372.927	193.94	204.69	264.745	534.884	518.033	628.969	465.249	586	146	151	256	416	415	1459	430	down
ENSMUSG00000025270.13	Alas2	X	150547375	150570638	+	23264	-5.5134	9.88984e-05	0.0124554	0	14.6119	5.42225	16.5465	5.14312	23.7172	319.011	1312.44	0	11	4	16	4	19	740	1213	down
ENSMUSG00000025371.12	Chmp6	11	119913441	119919548	+	6108	-2.37361	0.00431408	0.231511	178.827	15.9403	47.4447	41.3663	181.295	93.6204	617.76	583.184	281	12	35	40	141	75	1433	539	down
ENSMUSG00000025485.13	Ric8a	7	140856957	140864372	+	7416	-2.11707	0.00881786	0.363091	138.734	79.7015	16.2668	92.0401	124.721	84.8825	706.997	503.118	218	60	12	89	97	68	1640	465	down
ENSMUSG00000025487.15	Psmd13	7	140881968	140898643	+	16676	-1.87131	0.00588305	0.286558	424.475	124.866	120.645	111.689	484.739	166.02	930.736	1283.22	667	94	89	108	377	133	2159	1186	down
ENSMUSG00000025612.5	Bach1	16	87698945	87733346	+	34402	-1.01454	0.0132317	0.456723	152.735	441.015	409.38	262.676	774.039	416.923	639.315	721.677	240	332	302	254	602	334	1483	667	down
ENSMUSG00000025648.17	Pfkfb4	9	108991778	109032228	+	40451	-5.6783	0.00854515	0.359997	2.54558	0	0	0	64.289	0	9.4841	73.5743	4	0	0	0	50	0	22	68	down
ENSMUSG00000025723.12	Nmb	7	80902227	80905076	-	2850	-2.59281	0.00668052	0.309752	24.183	1.32836	66.4226	25.854	50.1454	133.565	143.555	381.937	38	1	49	25	39	107	333	353	down
ENSMUSG00000025730.14	Rab40c	17	25882114	25919727	-	37614	-1.15484	0.038747	0.737115	87.186	86.3433	43.378	40.3322	65.5747	119.834	227.619	159.05	137	65	32	39	51	96	528	147	down
ENSMUSG00000025742.5	Prps2	X	167346322	167382749	-	36428	-3.38734	0.0232697	0.601293	49.6387	0	37.9558	37.2297	140.15	0	330.65	837.449	78	0	28	36	109	0	767	774	down
ENSMUSG00000025808.17	Ccdc7a	8	128734235	129065517	-	331283	-7.12715	0.00363093	0.209276	0	0	0	0	36.0018	0	19.3993	51.9348	0	0	0	0	28	0	45	48	down
ENSMUSG00000025854.15	Fam20c	5	138754514	138810077	+	55564	-3.89895	0.014236	0.473839	69.367	0	5.42225	0	158.151	6.24136	388.417	572.365	109	0	4	0	123	5	901	529	down
ENSMUSG00000026141.13	Col19a1	1	24261890	24587472	-	325583	-1.31848	0.0391066	0.737499	148.916	26.5672	92.1783	122.031	159.437	444.385	248.742	122.263	234	20	68	118	124	356	577	113	down
ENSMUSG00000026173.15	Plcd4	1	74542888	74567794	+	24907	-1.57715	0.0253116	0.630738	11.4551	10.6269	9.48894	14.4782	16.7151	57.4205	29.3145	34.6232	18	8	7	14	13	46	68	32	down
ENSMUSG00000026177.11	Slc11a1	1	74375195	74386062	+	10868	-8.8512	9.21952e-05	0.0118243	0	0	0	0	268.728	76.1446	9.9152	0	0	0	0	0	209	61	23	0	down
ENSMUSG00000026198.15	Abcb6	1	75171717	75180392	-	8676	-1.28063	0.00213496	0.146302	71.2761	41.1791	109.801	93.0743	207.01	144.8	198.304	215.313	112	31	81	90	161	116	460	199	down
ENSMUSG00000026223.15	Itm2c	1	85894281	85908675	+	14395	-1.96785	0.0150984	0.49367	144.461	171.358	333.469	134.441	324.016	51.1791	1652.82	1034.37	227	129	246	130	252	41	3834	956	down
ENSMUSG00000026246.12	Alppl2	1	87086694	87089928	-	3235	-8.1056	0.000380844	0.0390038	0	0	0	0	0	139.806	17.6749	54.0987	0	0	0	0	0	112	41	50	down
ENSMUSG00000026278.14	Bok	1	93685660	93695764	+	10105	-3.24758	0.00311922	0.190415	215.738	160.731	25.7557	130.304	205.725	9.98618	1714.04	3131.24	339	121	19	126	160	8	3976	2894	down
ENSMUSG00000026321.7	Tnfrsf11a	1	105780718	105847981	+	67264	-7.39338	0.026916	0.650235	0	0	0	0	20.5725	108.6	0	0	0	0	0	0	16	87	0	0	down
ENSMUSG00000026357.3	Rgs18	1	144752683	144775435	-	22753	-7.29939	0.0288684	0.671488	0	0	0	0	41.1449	79.8894	0	0	0	0	0	0	32	64	0	0	down
ENSMUSG00000026384.13	Ptpn4	1	119652467	119837613	-	185147	-1.15128	0.0188175	0.55006	164.826	122.209	50.1558	153.055	196.724	210.958	255.64	428.462	259	92	37	148	153	169	593	396	down
ENSMUSG00000026437.11	Cdk18	1	132112237	132139684	-	27448	-6.86921	0.0425391	0.749967	0	0	0	0	0	0	23.7103	66.0005	0	0	0	0	0	0	55	61	down
ENSMUSG00000026480.12	Ncf2	1	152800194	152836991	+	36798	-6.69221	0.000283644	0.0305016	0	3.98507	0	0	122.149	254.647	3.87986	3.24592	0	3	0	0	95	204	9	3	down
ENSMUSG00000026535.9	Ifi202b	1	173962568	173982744	-	20177	-20.8856	7.12685e-10	1.71776e-07	0	0	0	0	0	0	57.7668	0	0	0	0	0	0	0	134	0	down
ENSMUSG00000026567.16	Adcy10	1	165485183	165576774	+	91592	-2.27643	0.0479989	0.772152	14.0007	15.9403	5.42225	0	24.4298	64.9101	14.6573	68.1644	22	12	4	0	19	52	34	63	down
ENSMUSG00000026603.13	Smyd2	1	189880492	189922363	-	41872	-1.44807	0.0478576	0.771747	199.828	47.8209	222.312	95.1426	306.015	66.1584	747.089	421.97	314	36	164	92	238	53	1733	390	down
ENSMUSG00000026627.7	Tmem206	1	191325912	191350914	+	25003	-2.32393	0.0410796	0.740922	60.4574	0	79.9782	176.841	126.006	132.317	285.816	1045.19	95	0	59	171	98	106	663	966	down
ENSMUSG00000026656.15	Fcgr2b	1	170958617	170976547	-	17931	-7.27445	0.00463654	0.243214	2.54558	0	0	0	95.1477	337.033	0	0	4	0	0	0	74	270	0	0	down
ENSMUSG00000026709.10	Dars2	1	161040601	161070658	-	30058	-2.81759	0.0257406	0.636425	0	19.9254	88.1116	20.6832	24.4298	113.593	212.53	552.889	0	15	65	20	19	91	493	511	down
ENSMUSG00000026726.10	Cubn	2	13276338	13491813	-	215476	-3.86791	0.0306716	0.679091	0	11.9552	0	0	52.7169	14.9793	13.7951	88.7219	0	9	0	0	41	12	32	82	down
ENSMUSG00000026749.11	Nek6	2	38511643	38594606	+	82964	-1.62808	0.0326951	0.698336	709.58	99.6268	134.201	257.505	343.303	279.613	1932.6	1159.88	1115	75	99	249	267	224	4483	1072	down
ENSMUSG00000026817.14	Ak1	2	32621758	32635058	+	13301	-8.11718	0.000421613	0.0422504	0	0	0	0	19.2867	0	155.626	37.8691	0	0	0	0	15	0	361	35	down
ENSMUSG00000026840.14	Lamc3	2	31887291	31946539	+	59249	-7.01472	0.0383238	0.734908	0	0	0	0	0	0	15.9505	83.3121	0	0	0	0	0	0	37	77	down
ENSMUSG00000026930.15	Gpsm1	2	26315515	26348237	+	32723	-2.98979	0.00157332	0.119719	54.0935	15.9403	4.06669	12.4099	78.4325	52.4274	114.671	450.102	85	12	3	12	61	42	266	416	down
ENSMUSG00000026955.13	Sapcd2	2	25372321	25378213	+	5893	-9.40648	3.08314e-05	0.00446641	0	0	0	0	0	6.24136	77.5972	437.118	0	0	0	0	0	5	180	404	down
ENSMUSG00000026970.16	Rbms1	2	60750193	60963192	-	213000	-1.46482	0.00860784	0.360279	702.579	373.269	216.89	249.232	442.308	586.688	1697.65	1532.08	1104	281	160	241	344	470	3938	1416	down
ENSMUSG00000026981.15	Il1rn	2	24336853	24351494	+	14642	-6.31616	3.27259e-06	0.000538225	0	3.98507	0	4.13663	37.2876	483.081	88.8057	21.6395	0	3	0	4	29	387	206	20	down
ENSMUSG00000027087.11	Itgav	2	83724397	83806916	+	82520	-1.9966	0.0161068	0.512322	148.28	358.657	309.068	48.6054	169.723	187.241	1343.29	1746.31	233	270	228	47	132	150	3116	1614	down
ENSMUSG00000027175.10	Tcp11l1	2	104657288	104712169	-	54882	-1.80992	0.00358766	0.207676	87.8224	35.8657	43.378	48.6054	271.299	48.6826	210.375	229.379	138	27	32	47	211	39	488	212	down
ENSMUSG00000027263.12	Tubgcp4	2	121170654	121198770	+	28117	-2.24266	0.0122024	0.438295	86.5496	393.194	1061.41	1104.48	5166.26	119.834	4214.39	3017.63	136	296	783	1068	4018	96	9776	2789	down
ENSMUSG00000027329.9	Spef1	2	131170261	131187282	-	17022	-1.84315	0.0198372	0.568159	8.90952	3.98507	14.9112	16.5465	45.0023	18.7241	30.6078	64.9185	14	3	11	16	35	15	71	60	down
ENSMUSG00000027330.16	Cdc25b	2	131186949	131198497	+	11549	-1.37082	0.00160054	0.121272	936.136	801	715.737	692.886	1149.49	1190.85	1739.9	4056.32	1471	603	528	670	894	954	4036	3749	down
ENSMUSG00000027371.10	Fahd2a	2	127436215	127444565	-	8351	-1.92302	0.0127884	0.446556	37.5473	91.6567	28.4668	131.338	176.152	51.1791	319.011	548.561	59	69	21	127	137	41	740	507	down
ENSMUSG00000027435.8	Cd93	2	148436640	148443563	-	6924	-5.77685	0.0101532	0.395917	0	0	5.42225	0	51.4312	224.689	0	9.73777	0	0	4	0	40	180	0	9	down
ENSMUSG00000027531.16	Impa1	3	10311956	10331439	-	19484	-2.70948	0.000280949	0.0303283	232.284	111.582	112.512	250.266	325.302	187.241	1448.05	2664.9	365	84	83	242	253	150	3359	2463	down
ENSMUSG00000027575.19	Arfgap1	2	180967225	180982526	+	15302	-2.36677	0.00460804	0.243214	17.819	90.3283	44.7336	101.348	142.721	44.9378	477.654	642.693	28	68	33	98	111	36	1108	594	down
ENSMUSG00000027582.16	Zgpat	2	181364928	181383628	+	18701	-1.0983	0.0375462	0.730958	41.3656	27.8955	44.7336	81.6985	84.8614	91.1238	157.781	84.394	65	21	33	79	66	73	366	78	down
ENSMUSG00000027597.15	Ahcy	2	155059310	155074497	-	15188	-1.37879	0.0206349	0.57693	252.012	71.7313	187.068	99.2792	264.871	173.51	381.089	769.284	396	54	138	96	206	139	884	711	down
ENSMUSG00000027602.9	Map1lc3a	2	155276297	155278073	+	1777	-1.27994	0.0281837	0.666043	1213.6	782.403	569.337	609.119	984.907	469.35	2790.48	3464.48	1907	589	420	589	766	376	6473	3202	down
ENSMUSG00000027674.16	Pex5l	3	32949408	33143247	-	193840	-6.51556	0.0169646	0.525262	0	0	0	0	0	43.6895	21.1237	5.40987	0	0	0	0	0	35	49	5	down
ENSMUSG00000027690.13	Slc2a2	3	28697903	28731359	+	33457	-7.31301	0.0244497	0.618633	0	0	0	0	68.1463	0	53.887	0	0	0	0	0	53	0	125	0	down
ENSMUSG00000027763.13	Mbnl1	3	60472830	60629750	+	156921	-1.36209	0.0224189	0.59255	233.557	46.4925	61.0003	109.621	358.732	177.255	404.368	222.887	367	35	45	106	279	142	938	206	down
ENSMUSG00000027782.10	Kpna4	3	69067149	69127113	-	59965	-2.15387	0.0205218	0.575375	178.827	22.5821	5.42225	48.6054	113.149	147.296	466.445	415.478	281	17	4	47	88	118	1082	384	down
ENSMUSG00000027832.5	Ptx3	3	66219910	66225805	+	5896	-5.01777	0.00210543	0.145707	475.386	38.5224	233.157	56.8787	50.1454	27.462	16245.4	9731.28	747	29	172	55	39	22	37684	8994	down
ENSMUSG00000027857.10	Tshb	3	102775465	102782718	-	7254	-6.10576	0.0294011	0.672588	0	0	0	0	15.4293	0	23.2792	14.0657	0	0	0	0	12	0	54	13	down
ENSMUSG00000027963.14	Extl2	3	116007462	116029017	+	21556	-1.54088	0.0290391	0.671488	14.0007	55.791	86.756	115.826	109.291	107.351	293.576	279.15	22	42	64	112	85	86	681	258	down
ENSMUSG00000027978.9	Prss12	3	123446913	123506597	+	59685	-1.75987	0.01256	0.443474	40.0928	9.29851	16.2668	56.8787	111.863	56.1722	96.5654	153.64	63	7	12	55	87	45	224	142	down
ENSMUSG00000027995.10	Tlr2	3	83836272	83841767	-	5496	-7.36615	0.0230116	0.597382	0	0	0	0	87.433	0	39.2297	0	0	0	0	0	68	0	91	0	down
ENSMUSG00000028028.11	Alpk1	3	127670310	127780527	-	110218	-7.52352	0.002458	0.160568	0	0	0	0	0	26.2137	6.89753	108.197	0	0	0	0	0	21	16	100	down
ENSMUSG00000028332.13	Hemgn	4	46393989	46413506	-	19518	-6.83446	0.0436021	0.753678	0	0	0	0	0	57.4205	30.1767	0	0	0	0	0	0	46	70	0	down
ENSMUSG00000028344.12	Invs	4	48279760	48431954	+	152195	-1.179	0.0201212	0.571068	106.914	49.1492	43.378	122.031	135.007	152.289	265.124	177.444	168	37	32	118	105	122	615	164	down
ENSMUSG00000028370.7	Pappa	4	65124174	65357509	+	233336	-22.0075	8.01423e-11	4.97933e-08	0	0	0	0	0	0	0	139.575	0	0	0	0	0	0	0	129	down
ENSMUSG00000028411.15	Aptx	4	40682382	40703194	-	20813	-1.17279	0.0036837	0.211051	197.282	227.149	311.78	316.453	369.019	369.488	727.689	903.449	310	171	230	306	287	296	1688	835	down
ENSMUSG00000028476.13	Reck	4	43875530	43944806	+	69277	-1.19733	0.00386547	0.217454	110.096	112.91	128.778	86.8693	325.302	263.385	120.276	298.625	173	85	95	84	253	211	279	276	down
ENSMUSG00000028488.15	Sh3gl2	4	85205126	85639195	+	434070	-1.85113	0.00956336	0.383069	46.4568	15.9403	28.4668	13.4441	29.5729	94.8687	148.728	104.952	73	12	21	13	23	76	345	97	down
ENSMUSG00000028540.6	Dph2	4	117888643	117892032	-	3390	-4.04231	6.11201e-07	0.000104199	10.1823	0	17.6223	8.27327	138.864	88.6273	131.053	236.953	16	0	13	8	108	71	304	219	down
ENSMUSG00000028553.12	Angptl3	4	99030954	99046111	+	15158	-5.87115	0.0495717	0.784136	0	0	0	0	0	8.7379	30.6078	5.40987	0	0	0	0	0	7	71	5	down
ENSMUSG00000028578.8	Caap1	4	94500081	94556796	-	56716	-1.91441	0.0396589	0.737857	99.9139	50.4776	52.867	44.4688	12.8578	58.6688	411.696	451.184	157	38	39	43	10	47	955	417	down
ENSMUSG00000028651.12	Ppie	4	123127115	123139951	-	12837	-1.69616	0.0126849	0.444992	253.921	95.6418	188.423	59.9812	280.3	129.82	566.029	962.958	399	72	139	58	218	104	1313	890	down
ENSMUSG00000028789.16	Azin2	4	128930233	128962442	-	32210	-6.9821	0.0060401	0.292678	0	0	0	0	63.0032	0	12.5018	21.6395	0	0	0	0	49	0	29	20	down
ENSMUSG00000028807.2	Zbtb8a	4	129353628	129378116	-	24489	-6.83341	0.0436344	0.753678	0	0	0	0	0	0	62.5089	24.8854	0	0	0	0	0	0	145	23	down
ENSMUSG00000028878.11	Fam76a	4	132899213	132922558	-	23346	-1.49839	0.0156048	0.503804	221.465	116.895	65.067	61.0154	192.867	194.73	664.318	261.838	348	88	48	59	150	156	1541	242	down
ENSMUSG00000028931.11	Kcnab2	4	152390742	152477871	-	87130	-4.26864	0.0228248	0.594908	0	0	5.42225	8.27327	108.005	96.1169	0	58.4266	0	0	4	8	84	77	0	54	down
ENSMUSG00000028972.11	Car6	4	150187015	150201332	-	14318	-6.79506	0.0448344	0.76291	0	0	0	0	0	62.4136	22.8481	0	0	0	0	0	0	50	53	0	down
ENSMUSG00000028998.6	Tomm7	5	23838944	23844161	-	5218	-1.06171	0.00648194	0.304075	1118.78	459.612	466.314	592.573	947.619	1088.49	1699.38	1774.44	1758	346	344	573	737	872	3942	1640	down
ENSMUSG00000029020.13	Mfn2	4	147873599	147904704	-	31106	-1.24466	0.0300441	0.67499	175.008	159.403	71.8448	48.6054	181.295	172.262	472.912	251.018	275	120	53	47	141	138	1097	232	down
ENSMUSG00000029084.5	Cd38	5	43868553	43912375	+	43823	-3.94472	0.00644453	0.302828	16.5462	50.4776	5.42225	0	628.746	434.399	1.72438	48.6889	26	38	4	0	489	348	4	45	down
ENSMUSG00000029153.11	Ociad2	5	73322199	73341028	-	18830	-4.89433	0.00393186	0.219862	0	0	0	20.6832	11.572	78.6411	394.453	132.001	0	0	0	20	9	63	915	122	down
ENSMUSG00000029163.9	Emilin1	5	30913402	30921277	+	7876	-21.5975	1.80049e-10	8.5322e-08	0	0	0	0	0	98.6135	0	0	0	0	0	0	0	79	0	0	down
ENSMUSG00000029165.16	Agbl5	5	30888694	30906965	+	18272	-1.48062	0.0273125	0.654452	141.916	255.045	367.358	261.642	255.87	288.351	1875.7	438.2	223	192	271	253	199	231	4351	405	down
ENSMUSG00000029231.15	Pdgfra	5	75152292	75198215	+	45924	-4.14567	0.0207038	0.578038	2.54558	0	0	8.27327	0	51.1791	103.032	40.0331	4	0	0	8	0	41	239	37	down
ENSMUSG00000029236.4	Nmu	5	76333495	76363788	-	30294	-1.04717	0.00719042	0.323757	210.01	330.761	489.358	205.798	513.026	476.84	720.792	837.449	330	249	361	199	399	382	1672	774	down
ENSMUSG00000029309.7	Sparcl1	5	104079111	104113733	-	34623	-22.9804	1.03555e-13	2.63209e-10	0	0	0	0	0	264.634	0	8.6558	0	0	0	0	0	212	0	8	down
ENSMUSG00000029364.15	Wsb2	5	117357304	117378601	+	21298	-1.70348	0.0455706	0.763358	563.209	151.433	183.001	42.4005	318.873	129.82	1675.67	939.154	885	114	135	41	248	104	3887	868	down
ENSMUSG00000029371.7	Cxcl5	5	90759360	90761624	+	2265	-8.05577	0.000314362	0.032994	0	0	0	0	29.5729	0	68.5442	106.034	0	0	0	0	23	0	159	98	down
ENSMUSG00000029373.7	Pf4	5	90772435	90773383	+	949	-8.72841	0.000112845	0.0140224	0	5.31343	0	12.4099	3272.31	4221.66	1.72438	9.73777	0	4	0	12	2545	3382	4	9	down
ENSMUSG00000029468.17	P2rx7	5	122643911	122691432	+	47522	-7.06785	0.00889924	0.365903	0	0	0	0	60.4316	3.74482	0	38.9511	0	0	0	0	47	3	0	36	down
ENSMUSG00000029471.13	Camkk2	5	122731170	122779409	-	48240	-3.44513	0.00446476	0.237772	6.36394	21.2537	56.9337	5.17079	36.0018	14.9793	73.2863	847.186	10	16	42	5	28	12	170	783	down
ENSMUSG00000029480.13	Dhx37	5	125413858	125434121	-	20264	-2.34292	0.0317793	0.689882	32.4561	22.5821	18.9779	0	195.438	26.2137	75.0106	80.0661	51	17	14	0	152	21	174	74	down
ENSMUSG00000029530.16	Ccr9	9	123678439	123784330	+	105892	-2.25342	0.0082057	0.351389	5.09115	26.5672	37.9558	58.947	108.005	330.792	43.9718	128.755	8	20	28	57	84	265	102	119	down
ENSMUSG00000029581.14	Fscn1	5	142960343	142973185	+	12843	-2.21456	0.00519378	0.263067	253.285	69.0746	88.1116	77.5619	177.438	91.1238	1035.06	965.122	398	52	65	75	138	73	2401	892	down
ENSMUSG00000029621.14	Arpc1a	5	145083830	145108761	+	24932	-1.0912	0.0202545	0.572017	744.581	418.433	284.668	326.794	658.319	466.854	1396.75	1260.5	1170	315	210	316	512	374	3240	1165	down
ENSMUSG00000029860.16	Zyx	6	42349630	42360213	+	10584	-2.38362	2.84201e-07	4.99748e-05	217.647	150.104	128.778	141.68	693.035	322.054	1407.1	911.023	342	113	95	137	539	258	3264	842	down
ENSMUSG00000029919.5	Hpgds	6	65117293	65144908	-	27616	-7.71573	0.000288252	0.0307888	3.18197	0	0	0	108.005	629.129	0	5.40987	5	0	0	0	84	504	0	5	down
ENSMUSG00000030041.9	M1ap	6	82946902	83030309	+	83408	-5.84104	0.000712456	0.0644646	0	0	0	5.17079	11.572	4.99309	96.9965	185.018	0	0	0	5	9	4	225	171	down
ENSMUSG00000030047.14	Arhgap25	6	87458545	87533259	-	74715	-8.44549	4.5579e-09	8.50816e-07	0	0	0	0	78.4325	114.841	48.7138	25.9674	0	0	0	0	61	92	113	24	down
ENSMUSG00000030055.16	Rab43	6	87788853	87812164	-	23312	-4.12913	0.0383071	0.734908	8.90952	0	0	1.03416	20.5725	0	147.004	12.9837	14	0	0	1	16	0	341	12	down
ENSMUSG00000030116.14	Mfap5	6	122505845	122529290	+	23446	-2.38787	0.00307088	0.189434	45.8204	39.8507	69.1337	27.9223	64.289	41.193	449.202	399.249	72	30	51	27	50	33	1042	369	down
ENSMUSG00000030117.5	Gdf3	6	122605403	122610087	-	4685	-8.02578	0.00958762	0.383491	0	0	0	0	59.1458	141.055	0	0	0	0	0	0	46	113	0	0	down
ENSMUSG00000030123.15	Plxnd1	6	115954811	115995005	-	40195	-6.91107	0.00755707	0.334316	0	0	0	0	0	9.98618	18.5371	63.8365	0	0	0	0	0	8	43	59	down
ENSMUSG00000030144.4	Clec4d	6	123262111	123275265	+	13155	-8.42298	0.00472787	0.246158	0	0	0	0	93.8619	169.765	0	0	0	0	0	0	73	136	0	0	down
ENSMUSG00000030148.15	Clec4a2	6	123106428	123143999	+	37572	-8.92946	0.00178534	0.131014	0	0	0	0	213.439	161.027	0	0	0	0	0	0	166	129	0	0	down
ENSMUSG00000030272.15	Camk1	6	113334124	113343984	-	9861	-1.45211	0.0105859	0.407111	695.579	209.881	330.757	354.716	330.445	808.88	1990.8	1224.8	1093	158	244	343	257	648	4618	1132	down
ENSMUSG00000030351.5	Tspan11	6	127887589	127953977	+	66389	-8.24154	0.00548568	0.273502	0	0	0	0	0	0	184.509	47.6069	0	0	0	0	0	0	428	44	down
ENSMUSG00000030365.11	Clec2i	6	128887588	128898167	+	10580	-6.17882	0.0347731	0.715922	0	0	0	0	7.71467	43.6895	4.31096	0	0	0	0	0	6	35	10	0	down
ENSMUSG00000030380.17	Mzf1	7	13042303	13054764	-	12462	-8.09959	0.000288518	0.0307888	0	0	0	0	84.8614	0	99.5831	25.9674	0	0	0	0	66	0	231	24	down
ENSMUSG00000030427.17	Lilra6	7	3908280	3915503	-	7224	-6.20785	1.90842e-05	0.00283817	0	0	4.06669	0	54.0027	62.4136	130.622	18.3936	0	0	3	0	42	50	303	17	down
ENSMUSG00000030469.10	Zfp719	7	43579610	43593235	+	13626	-5.08705	0.0168738	0.523613	0	0	0	20.6832	28.2871	0	163.385	512.856	0	0	0	20	22	0	379	474	down
ENSMUSG00000030541.16	Idh2	7	80094846	80115392	-	20547	-1.73333	0.0175211	0.533144	439.112	132.836	116.578	66.1861	299.587	188.489	1166.54	858.006	690	100	86	64	233	151	2706	793	down
ENSMUSG00000030560.17	Ctsc	7	88278085	88310888	+	32804	-1.69824	0.0317929	0.689882	2749.22	297.552	570.692	630.837	993.907	1350.63	8855.57	2589.17	4320	224	421	610	773	1082	20542	2393	down
ENSMUSG00000030579.10	Tyrobp	7	30413760	30417585	+	3826	-26.2175	9.28225e-15	4.78542e-11	0	0	0	0	1348.78	2179.48	0	0	0	0	0	0	1049	1746	0	0	down
ENSMUSG00000030678.7	Maz	7	127022130	127027037	-	4908	-1.65675	0.0467925	0.768666	92.2772	31.8806	25.7557	95.1426	151.722	19.9724	349.187	253.182	145	24	19	92	118	16	810	234	down
ENSMUSG00000030733.10	Sh2b1	7	126466994	126475424	-	8431	-1.13313	0.0478632	0.771747	167.372	106.269	59.6448	178.909	279.014	98.6135	275.039	472.823	263	80	44	173	217	79	638	437	down
ENSMUSG00000030782.16	Tgfb1i1	7	128246812	128255699	+	8888	-1.60244	0.0435864	0.753678	488.751	147.448	101.667	87.9035	297.015	111.096	1362.69	738.989	768	111	75	85	231	89	3161	683	down
ENSMUSG00000030786.18	Itgam	7	128062640	128118491	+	55852	-9.41337	0.000659244	0.0602955	0	0	0	0	235.298	288.351	0	0	0	0	0	0	183	231	0	0	down
ENSMUSG00000030865.4	Chp2	7	122219496	122222824	+	3329	-2.0842	0.0066736	0.309752	27.3649	18.597	52.867	10.3416	51.4312	46.1861	170.283	192.592	43	14	39	10	40	37	395	178	down
ENSMUSG00000030966.13	Trim21	7	102557921	102565486	-	7566	-7.06853	0.000186426	0.0213618	0	0	0	0	7.71467	7.48963	56.0424	31.3773	0	0	0	0	6	6	130	29	down
ENSMUSG00000031355.16	Arhgap6	X	168795099	169304435	+	509337	-6.43452	0.0176558	0.533144	0	0	0	0	37.2876	0	8.62191	20.5575	0	0	0	0	29	0	20	19	down
ENSMUSG00000031371.14	Haus7	X	73437315	73459044	-	21730	-1.01808	0.0308664	0.679911	183.282	144.791	206.046	173.739	208.296	177.255	615.605	429.544	288	109	152	168	162	142	1428	397	down
ENSMUSG00000031379.13	Pir	X	164269371	164373011	+	103641	-1.28972	0.00363777	0.209276	49.0024	107.597	164.023	118.928	325.302	224.689	300.905	218.559	77	81	121	115	253	180	698	202	down
ENSMUSG00000031389.17	Arhgap4	X	73891442	73921870	-	30429	-7.91529	4.4641e-07	7.70443e-05	0	0	0	0	81.0041	62.4136	18.5371	23.8034	0	0	0	0	63	50	43	22	down
ENSMUSG00000031390.8	Avpr2	X	73892102	73895502	+	3401	-6.0848	0.0403122	0.740452	0	0	0	0	21.8582	24.9654	0	5.40987	0	0	0	0	17	20	0	5	down
ENSMUSG00000031508.14	Ankrd10	8	11611583	11635757	-	24175	-1.27275	0.0204074	0.574177	323.925	164.716	225.023	281.291	380.591	176.006	877.28	970.532	509	124	166	272	296	141	2035	897	down
ENSMUSG00000031530.6	Dusp4	8	34807297	34819894	+	12598	-7.83867	0.011032	0.412033	0	0	0	0	0	44.9378	130.622	0	0	0	0	0	0	36	303	0	down
ENSMUSG00000031613.9	Hpgd	8	56294585	56321043	+	26459	-8.91605	2.17488e-11	1.96154e-08	0	0	0	0	110.577	93.6204	128.467	37.8691	0	0	0	0	86	75	298	35	down
ENSMUSG00000031736.11	Crnde	8	92326033	92356120	-	30088	-1.58593	0.00859279	0.360189	15.9099	21.2537	21.689	49.6396	114.434	48.6826	83.2015	78.9842	25	16	16	48	89	39	193	73	down
ENSMUSG00000031813.8	Mvb12a	8	71542922	71548085	+	5164	-1.70588	0.00618755	0.295722	198.555	73.0597	89.4672	200.627	276.443	137.31	807.011	613.48	312	55	66	194	215	110	1872	567	down
ENSMUSG00000031827.13	Cotl1	8	119809222	119840544	-	31323	-2.99404	0.000138507	0.0166203	198.555	33.2089	70.4893	149.953	471.881	169.765	2332.23	635.119	312	25	52	145	367	136	5410	587	down
ENSMUSG00000031838.8	Ifi30	8	70762774	70766663	-	3890	-1.70665	0.0111926	0.413933	287.65	27.8955	65.067	238.891	470.595	714.012	436.7	406.823	452	21	48	231	366	572	1013	376	down
ENSMUSG00000031883.13	Car7	8	104534689	104550343	+	15655	-5.5833	0.0133386	0.456979	1.27279	0	0	0	45.0023	0	15.9505	24.8854	2	0	0	0	35	0	37	23	down
ENSMUSG00000031902.10	Nfatc3	8	106058840	106130537	+	71698	-1.57351	0.0184453	0.542284	63.6394	85.0149	47.4447	95.1426	240.441	33.7033	275.039	317.019	100	64	35	92	187	27	638	293	down
ENSMUSG00000031960.14	Aars	8	111033144	111057664	+	24521	-1.05194	0.00333837	0.200055	234.193	235.119	441.914	412.629	730.323	454.371	653.11	904.531	368	177	326	399	568	364	1515	836	down
ENSMUSG00000031967.15	Afg3l1	8	123477903	123503916	+	26014	-1.80989	0.0230511	0.597853	133.643	110.254	10.8445	25.854	186.438	106.103	314.7	378.691	210	83	8	25	145	85	730	350	down
ENSMUSG00000032038.7	St3gal4	9	35046576	35119268	-	72693	-3.81158	0.000155909	0.0183154	237.375	85.0149	112.512	115.826	122.149	61.1653	2622.79	4932.72	373	64	83	112	95	49	6084	4559	down
ENSMUSG00000032083.8	Apoa1	9	46228580	46230466	+	1887	-6.1657	8.17142e-09	1.5001e-06	5.09115	5.31343	0	4.13663	37.2876	44.9378	597.499	383.019	8	4	0	4	29	36	1386	354	down
ENSMUSG00000032245.12	Cln6	9	62838785	62852006	+	13222	-1.12522	0.0046934	0.245276	183.282	192.612	111.156	93.0743	444.88	222.192	307.802	292.133	288	145	82	90	346	178	714	270	down
ENSMUSG00000032305.15	Fam219b	9	57537528	57543184	+	5657	-2.6985	0.0224274	0.59255	0	6.64179	51.5114	24.8198	36.0018	168.517	214.686	115.771	0	5	38	24	28	135	498	107	down
ENSMUSG00000032306.14	Mpi	9	57544256	57552763	-	8508	-1.22813	0.00873279	0.361984	192.191	256.373	73.2004	101.348	272.585	329.544	459.117	398.167	302	193	54	98	212	264	1065	368	down
ENSMUSG00000032355.16	Mlip	9	77102081	77352969	-	250889	-1.05275	0.00307605	0.189434	140.007	123.537	115.223	93.0743	154.293	303.33	222.876	299.707	220	93	85	90	120	243	517	277	down
ENSMUSG00000032382.14	Snx1	9	66088133	66126587	-	38455	-1.20575	0.0357799	0.720117	845.131	288.254	345.669	366.092	389.591	531.764	1649.8	1686.8	1328	217	255	354	303	426	3827	1559	down
ENSMUSG00000032494.12	Tdgf1	9	110939603	110946158	-	6556	-26.1741	1.02695e-14	4.78542e-11	0	0	0	0	0	0	164.247	2871.56	0	0	0	0	0	0	381	2654	down
ENSMUSG00000032495.8	Lrrc2	9	110951545	110984066	+	32522	-2.3549	0.00548784	0.273502	152.098	75.7164	46.0891	341.272	266.156	113.593	946.255	1823.13	239	57	34	330	207	91	2195	1685	down
ENSMUSG00000032498.9	Mlh1	9	111228228	111271791	-	43564	-2.35635	0.000816075	0.0717504	9.54591	100.955	21.689	50.6738	155.579	248.406	253.053	273.74	15	76	16	49	121	199	587	253	down
ENSMUSG00000032578.7	Cish	9	107296026	107302784	+	6759	-6.87281	0.00838701	0.355988	0	0	0	0	59.1458	0	23.2792	7.57382	0	0	0	0	46	0	54	7	down
ENSMUSG00000032593.5	Amigo3	9	108053159	108055701	+	2543	-7.40535	0.0207897	0.57836	0	0	0	0	0	0	54.3181	75.7382	0	0	0	0	0	0	126	70	down
ENSMUSG00000032596.14	Uba7	9	107975505	107984060	+	8556	-7.72771	8.15922e-06	0.00128883	0	0	0	0	73.2894	54.924	29.3145	5.40987	0	0	0	0	57	44	68	5	down
ENSMUSG00000032690.16	Oas2	5	120730333	120749853	-	19521	-21.7653	1.2951e-10	7.09992e-08	0	0	0	0	0	112.344	0	0	0	0	0	0	0	90	0	0	down
ENSMUSG00000032698.15	Lmo2	2	103957986	103981878	+	23893	-8.8787	0.0020414	0.14413	0	0	0	0	111.863	249.654	0	0	0	0	0	0	87	200	0	0	down
ENSMUSG00000032788.15	Pdxk	10	78436744	78464975	-	28232	-8.45052	0.000114674	0.0141867	0	0	0	0	88.7188	148.544	31.47	0	0	0	0	0	69	119	73	0	down
ENSMUSG00000032850.16	Rnft2	5	118190736	118245116	-	54381	-4.02668	0.00235947	0.155954	0	19.9254	0	22.7515	174.866	365.744	65.5265	86.558	0	15	0	22	136	293	152	80	down
ENSMUSG00000032997.16	Chpf	1	75474569	75479307	-	4739	-1.45774	0.00659553	0.307854	58.5483	150.104	97.6005	86.8693	279.014	92.3721	339.703	364.626	92	113	72	84	217	74	788	337	down
ENSMUSG00000033308.16	Dpyd	3	118562129	119432924	+	870796	-6.64884	0.0496682	0.784136	0	0	0	0	77.1467	0	0	0	0	0	0	0	60	0	0	0	down
ENSMUSG00000033377.14	Palmd	3	116918258	116968987	-	50730	-21.2901	3.27297e-10	1.18843e-07	0	0	0	0	0	0	0	78.9842	0	0	0	0	0	0	0	73	down
ENSMUSG00000033475.15	Tomm6	17	47686646	47688386	-	1741	-1.47553	0.000557965	0.0528819	373.563	862.104	592.381	763.209	1035.05	1087.24	2318.86	2759.04	587	649	437	738	805	871	5379	2550	down
ENSMUSG00000033545.14	Znrf1	8	111536097	111626030	+	89934	-1.38074	0.00729466	0.324247	33.7289	50.4776	52.867	36.1955	54.0027	93.6204	142.262	157.968	53	38	39	35	42	75	330	146	down
ENSMUSG00000033585.5	Ndn	7	62346569	62350262	+	3694	-4.05054	0.026188	0.640096	0	0	21.689	6.20495	66.8605	0	203.908	187.182	0	0	16	6	52	0	473	173	down
ENSMUSG00000033590.8	Myo5c	9	75232020	75305451	+	73432	-7.2382	0.0274752	0.656371	0	0	0	0	0	0	31.47	84.394	0	0	0	0	0	0	73	78	down
ENSMUSG00000033595.6	Lgi3	14	70530821	70538323	+	7503	-7.88271	0.00980336	0.388218	0	0	0	0	0	0	53.4559	127.673	0	0	0	0	0	0	124	118	down
ENSMUSG00000033685.13	Ucp2	7	100493337	100502020	+	8684	-1.08488	0.0451516	0.76291	1844.91	446.328	901.449	616.358	1143.06	1643.97	3929.87	1364.37	2899	336	665	596	889	1317	9116	1261	down
ENSMUSG00000033722.9	BC034090	1	155212471	155244444	-	31974	-2.68609	0.0364904	0.726532	6.36394	5.31343	0	16.5465	30.8587	14.9793	8.62191	128.755	10	4	0	16	24	12	20	119	down
ENSMUSG00000033769.16	Exoc6b	6	84618487	85069513	-	451027	-1.28376	0.0169885	0.525421	249.467	110.254	86.756	300.94	244.298	649.101	605.689	323.511	392	83	64	291	190	520	1405	299	down
ENSMUSG00000033777.3	Tlr13	X	106143204	106160493	+	17290	-7.67935	0.0162875	0.515891	0	0	0	0	92.5761	64.9101	0	0	0	0	0	0	72	52	0	0	down
ENSMUSG00000033857.12	Engase	11	118476829	118489209	+	12381	-7.11023	1.60099e-05	0.00242043	0	0	0	0	15.4293	34.9516	21.1237	34.6232	0	0	0	0	12	28	49	32	down
ENSMUSG00000033880.11	Lgals3bp	11	118392751	118402092	-	9342	-9.02453	8.20901e-09	1.5001e-06	0	0	0	0	163.294	183.496	14.6573	38.9511	0	0	0	0	127	147	34	36	down
ENSMUSG00000033883.11	D3Ertd254e	3	36151017	36170342	+	19326	-5.8594	0.00029273	0.0311196	0	0	0	5.17079	3.85734	86.1308	61.2156	151.476	0	0	0	5	3	69	142	140	down
ENSMUSG00000034157.12	Cipc	12	86947043	86965362	+	18320	-1.71191	0.00303434	0.188947	147.643	61.1045	56.9337	93.0743	505.311	144.8	151.315	379.773	232	46	42	90	393	116	351	351	down
ENSMUSG00000034216.12	Vps18	2	119288740	119298453	+	9714	-7.86024	0.000595875	0.0557193	0	0	0	0	27.0014	62.4136	88.8057	0	0	0	0	0	21	50	206	0	down
ENSMUSG00000034226.7	Rhov	2	119269201	119271272	-	2072	-21.295	3.24344e-10	1.18843e-07	0	0	0	0	0	78.6411	0	0	0	0	0	0	0	63	0	0	down
ENSMUSG00000034343.14	Ube2f	1	91250304	91290337	+	40034	-1.13355	0.0224863	0.59255	479.841	102.284	394.469	430.21	501.454	631.626	1075.15	879.646	754	77	291	416	390	506	2494	813	down
ENSMUSG00000034394.14	Lif	11	4257557	4272514	+	14958	-7.7085	0.000758566	0.0677112	0	0	0	0	0	34.9516	44.4029	81.1481	0	0	0	0	0	28	103	75	down
ENSMUSG00000034422.14	Parp14	16	35832874	35871544	-	38671	-8.65394	6.51851e-10	1.6419e-07	0	0	0	0	111.863	96.1169	75.4417	25.9674	0	0	0	0	87	77	175	24	down
ENSMUSG00000034424.5	Gcsh	8	116981810	116993537	-	11728	-2.22071	0.00859203	0.360189	456.295	168.701	138.267	58.947	335.588	103.607	1703.26	1693.29	717	127	102	57	261	83	3951	1565	down
ENSMUSG00000034485.10	Uaca	9	60794542	60880370	+	85829	-7.66394	0.0018701	0.134067	0	0	0	0	0	6.24136	31.47	117.935	0	0	0	0	0	5	73	109	down
ENSMUSG00000034641.2	Cd300ld	11	114982274	114989922	-	7649	-8.48274	0.00416562	0.226705	0	0	0	0	133.721	141.055	0	0	0	0	0	0	104	113	0	0	down
ENSMUSG00000034652.12	Cd300a	11	114890041	114904654	+	14614	-22.1852	5.63256e-11	4.13432e-08	0	0	0	0	153.008	0	0	0	0	0	0	0	119	0	0	0	down
ENSMUSG00000034674.18	Tdg	10	82629828	82650799	+	20972	-2.9897	0.0141322	0.471357	126.642	0	24.4001	61.0154	285.443	21.2206	362.983	1020.3	199	0	18	59	222	17	842	943	down
ENSMUSG00000034755.18	Pcdh11x	X	120290259	120910619	+	620361	-6.75874	0.0459963	0.765143	0	0	0	0	54.0027	0	0	29.2133	0	0	0	0	42	0	0	27	down
ENSMUSG00000034765.6	Dusp5	19	53529109	53542431	+	13323	-3.1759	0.0120265	0.434432	82.0948	7.97015	5.42225	23.7856	10.2862	9.98618	640.608	423.052	129	6	4	23	8	8	1486	391	down
ENSMUSG00000034786.17	Gpsm3	17	34589806	34591754	+	1949	-7.14621	0.0031308	0.190491	0	0	0	0	0	38.6964	39.6608	30.2953	0	0	0	0	0	31	92	28	down
ENSMUSG00000034892.8	Rps29	12	69157722	69159186	-	1465	-1.09412	0.0135597	0.45787	3055.96	1206.15	996.339	1638.11	2284.83	2570.19	4028.16	5844.83	4802	908	735	1584	1777	2059	9344	5402	down
ENSMUSG00000034947.13	Tmem106a	11	101582242	101591788	+	9547	-1.68014	0.00368145	0.211051	136.825	276.298	92.1783	104.45	660.89	747.715	155.194	390.593	215	208	68	101	514	599	360	361	down
ENSMUSG00000035004.3	Igsf6	7	121064067	121074572	-	10506	-6.32729	0.00113579	0.0937198	0	5.31343	5.42225	0	168.437	666.577	0	5.40987	0	4	4	0	131	534	0	5	down
ENSMUSG00000035020.11	Epgn	5	91027464	91035215	+	7752	-8.58632	0.00313409	0.190491	0	0	0	0	0	0	256.933	37.8691	0	0	0	0	0	0	596	35	down
ENSMUSG00000035165.14	Kcne3	7	100176502	100184869	+	8368	-7.72798	0.0123547	0.440255	0	0	0	0	0	0	75.0106	87.64	0	0	0	0	0	0	174	81	down
ENSMUSG00000035172.15	Plekhh3	11	101162679	101171351	-	8673	-1.49993	0.0123833	0.440255	68.0942	103.612	52.867	127.201	102.862	121.082	419.456	349.478	107	78	39	123	80	97	973	323	down
ENSMUSG00000035293.13	G2e3	12	51348061	51376986	+	28926	-1.57973	0.0411778	0.740922	76.3673	21.2537	150.468	327.828	185.152	323.302	366	847.186	120	16	111	317	144	259	849	783	down
ENSMUSG00000035314.10	Gdpd5	7	99381414	99461877	+	80464	-7.10486	0.00402152	0.222199	0	0	0	0	19.2867	44.9378	41.3852	0	0	0	0	0	15	36	96	0	down
ENSMUSG00000035373.2	Ccl7	11	82045712	82047525	+	1814	-22.7016	6.86365e-13	1.06612e-09	0	0	0	0	264.871	0	0	3.24592	0	0	0	0	206	0	0	3	down
ENSMUSG00000035413.8	Tmem98	11	80810175	80822033	+	11859	-2.89855	0.0473713	0.771747	70.6398	0	50.1558	57.9129	324.016	0	506.968	503.118	111	0	37	56	252	0	1176	465	down
ENSMUSG00000035458.15	Tnni3	7	4518305	4524229	-	5925	-2.01157	0.0277098	0.65823	600.12	95.6418	71.8448	370.229	205.725	167.268	1433.82	2785	943	72	53	358	160	134	3326	2574	down
ENSMUSG00000035506.16	Slc12a8	16	33517328	33664135	+	146808	-1.14024	0.0476592	0.771747	291.469	154.09	172.157	126.167	896.188	218.448	331.081	196.919	458	116	127	122	697	175	768	182	down
ENSMUSG00000035547.14	Capn5	7	98121559	98178274	-	56716	-2.0863	0.0110675	0.412033	15.2735	37.194	14.9112	3.10248	34.716	108.6	59.9223	94.1318	24	28	11	3	27	87	139	87	down
ENSMUSG00000035559.9	Mpv17l2	8	70758649	70760946	-	2298	-1.69878	0.0078935	0.344514	261.558	51.806	70.4893	217.173	424.307	182.248	645.781	703.284	411	39	52	210	330	146	1498	650	down
ENSMUSG00000035560.5	Wdr20rt	12	65225517	65233359	+	7843	-7.32757	0.0240201	0.612754	0	0	0	0	74.5752	0	48.7138	0	0	0	0	0	58	0	113	0	down
ENSMUSG00000035642.16	Aamdc	7	97550331	97579497	-	29167	-1.05668	0.00309863	0.189988	117.097	253.716	325.335	225.447	520.741	434.399	475.499	480.397	184	191	240	218	405	348	1103	444	down
ENSMUSG00000035673.10	Sbno2	10	80056992	80105571	-	48580	-1.53837	0.0177373	0.533144	188.373	65.0895	154.534	59.9812	120.863	173.51	594.481	470.659	296	49	114	58	94	139	1379	435	down
ENSMUSG00000035674.13	Ndufa3	7	3617373	3620327	+	2955	-1.11039	0.0105226	0.405235	1998.91	939.149	820.116	891.445	1747.37	1414.29	2906.88	3974.09	3141	707	605	862	1359	1133	6743	3673	down
ENSMUSG00000035722.15	Abca7	10	79996494	80015572	+	19079	-5.86104	7.98152e-06	0.00126793	3.18197	0	0	0	34.716	34.9516	71.1308	87.64	5	0	0	0	27	28	165	81	down
ENSMUSG00000035783.8	Acta2	19	34241090	34255336	-	14247	-7.5422	0.0211389	0.581521	0	0	0	0	30.8587	112.344	0	0	0	0	0	0	24	90	0	0	down
ENSMUSG00000035891.16	Cerk	15	86139128	86186141	-	47014	-2.61639	0.0204583	0.574292	6.36394	0	78.6227	41.3663	145.293	112.344	109.067	405.741	10	0	58	40	113	90	253	375	down
ENSMUSG00000035954.10	Dock4	12	40445952	40846874	+	400923	-1.20479	0.0248166	0.623963	201.101	171.358	93.5339	104.45	164.58	180.999	370.742	599.414	316	129	69	101	128	145	860	554	down
ENSMUSG00000036099.16	Vezt	10	93939165	94035817	-	96653	-1.05701	0.0291879	0.672588	177.554	128.851	92.1783	94.1084	235.298	122.331	238.827	430.626	279	97	68	91	183	98	554	398	down
ENSMUSG00000036315.13	Znrd1	17	36954356	36958559	-	4204	-1.02992	0.0259053	0.637014	208.737	106.269	181.645	307.145	241.726	293.344	516.884	589.676	328	80	134	297	188	235	1199	545	down
ENSMUSG00000036412.5	Arsi	18	60911780	60918561	+	6782	-7.18105	0.0339467	0.708491	0	0	0	0	5.14312	0	106.05	0	0	0	0	0	4	0	246	0	down
ENSMUSG00000036438.12	Calm2	17	87433412	87446935	-	13524	-1.0075	0.00567472	0.280081	20115.8	11495.6	8518.36	14505.1	17894.2	19932.4	40503.6	31511.4	31609	8654	6284	14026	13917	15968	93955	29124	down
ENSMUSG00000036469.16	March1	8	65617900	66471637	+	853738	-6.73486	0.046774	0.768666	0	0	0	0	68.1463	13.731	0	0	0	0	0	0	53	11	0	0	down
ENSMUSG00000036553.16	Sh3tc1	5	35697180	35739987	-	42808	-20.0521	3.18256e-09	6.05314e-07	0	0	0	0	114.434	0	0	0	0	0	0	0	89	0	0	0	down
ENSMUSG00000036641.8	Ccdc148	2	58821697	59160683	-	338987	-1.2641	0.0251966	0.629554	25.4558	87.6716	135.556	129.27	165.866	304.578	234.947	199.083	40	66	100	125	129	244	545	184	down
ENSMUSG00000036699.12	Zcchc12	X	36195904	36199158	+	3255	-5.40925	0.0386376	0.737115	0	9.29851	0	0	0	0	148.728	240.198	0	7	0	0	0	0	345	222	down
ENSMUSG00000036743.3	Psma8	18	14706151	14762299	+	56149	-5.10382	0.0134151	0.457039	0	15.9403	0	0	0	106.103	118.12	315.937	0	12	0	0	0	85	274	292	down
ENSMUSG00000036820.11	Amdhd2	17	24155833	24163766	-	7934	-1.4302	0.00832803	0.354404	80.8221	87.6716	142.334	55.8446	101.577	396.95	303.06	183.936	127	66	105	54	79	318	703	170	down
ENSMUSG00000036834.16	Plch1	3	63696234	63899472	-	203239	-7.90734	0.0117688	0.429396	0	0	0	0	0	0	11.2085	173.116	0	0	0	0	0	0	26	160	down
ENSMUSG00000036887.5	C1qa	4	136895917	136898803	-	2887	-8.05569	0.00214806	0.146531	0	0	10.8445	7.23911	2041.82	2741.21	6.89753	0	0	0	8	7	1588	2196	16	0	down
ENSMUSG00000036896.5	C1qc	4	136889804	136893065	-	3262	-8.71197	0.000133289	0.0161326	5.09115	6.64179	0	7.23911	2678.28	5293.92	3.01767	0	8	5	0	7	2083	4241	7	0	down
ENSMUSG00000036905.8	C1qb	4	136880129	136886187	-	6059	-3.42831	9.38202e-06	0.00146543	89.0952	179.328	330.757	486.054	3767.33	6664.52	679.838	568.037	140	135	244	470	2930	5339	1577	525	down
ENSMUSG00000036975.5	Tmem177	1	119907890	119913208	-	5319	-8.89379	1.48281e-05	0.00227434	0	0	0	0	0	97.3652	104.325	163.378	0	0	0	0	0	78	242	151	down
ENSMUSG00000037029.8	Zfp146	7	30161269	30169750	-	8482	-6.19046	0.00171914	0.127532	0	5.31343	0	0	63.0032	0	156.488	150.395	0	4	0	0	49	0	363	139	down
ENSMUSG00000037035.5	Inhbb	1	119415465	119422248	-	6784	-4.84769	0.0421364	0.749127	187.736	0	0	28.9564	63.0032	9.98618	259.951	5915.16	295	0	0	28	49	8	603	5467	down
ENSMUSG00000037134.17	Prmt9	8	77549397	77581338	+	31942	-1.60141	0.0457664	0.763474	109.46	19.9254	16.2668	120.997	70.7179	146.048	288.834	306.199	172	15	12	117	55	117	670	283	down
ENSMUSG00000037190.12	Cyb561d2	9	107539007	107542193	-	3187	-1.20006	0.000124443	0.0152601	537.117	490.164	329.402	558.446	1405.36	694.039	1025.58	1278.89	844	369	243	540	1093	556	2379	1182	down
ENSMUSG00000037315.15	Jade3	X	20425688	20519939	+	94252	-3.08065	0.0261039	0.640096	53.4571	14.6119	0	0	106.72	54.924	175.025	244.526	84	11	0	0	83	44	406	226	down
ENSMUSG00000037341.14	Slc9a7	X	20105754	20291807	-	186054	-1.28938	0.0293169	0.672588	112.642	92.9851	78.6227	77.5619	147.865	59.9171	323.322	352.724	177	70	58	75	115	48	750	326	down
ENSMUSG00000037426.17	Depdc5	5	32863701	32994236	+	130536	-1.29907	0.0224483	0.59255	145.098	58.4477	195.201	36.1955	311.159	212.206	253.915	293.215	228	44	144	35	242	170	589	271	down
ENSMUSG00000037601.11	Nme1	11	93956979	93968521	-	11543	-1.55865	0.0297129	0.67499	2847.86	422.418	656.093	773.551	1629.08	835.094	6068.96	5315.74	4475	318	484	748	1267	669	14078	4913	down
ENSMUSG00000037638.5	Zbtb42	12	112678828	112682747	+	3920	-6.04047	0.0383123	0.734908	0	0	0	0	24.4298	0	3.44877	22.7215	0	0	0	0	19	0	8	21	down
ENSMUSG00000037731.5	Themis2	4	132781843	132796387	-	14545	-6.63794	0.00014306	0.0170204	0	0	0	0	16.7151	19.9724	20.2615	19.4755	0	0	0	0	13	16	47	18	down
ENSMUSG00000037855.15	Zfp365	10	67886103	67912662	-	26560	-7.16948	0.0313405	0.682968	0	0	0	0	0	0	20.6926	89.8039	0	0	0	0	0	0	48	83	down
ENSMUSG00000037997.12	Parp11	6	127446840	127494261	+	47422	-1.77464	0.00945774	0.379382	129.188	11.9552	119.29	120.997	459.023	158.531	388.848	300.789	203	9	88	117	357	127	902	278	down
ENSMUSG00000038059.6	Smim3	18	60474193	60501983	-	27791	-2.60223	0.000629522	0.0582808	220.192	69.0746	181.645	113.757	234.012	185.993	2274.03	856.924	346	52	134	110	182	149	5275	792	down
ENSMUSG00000038156.16	Spon1	7	113765998	114043370	+	277373	-1.21517	0.0258399	0.636425	71.9125	54.4627	172.157	64.1178	318.873	233.427	118.12	170.952	113	41	127	62	248	187	274	158	down
ENSMUSG00000038170.15	Pde4dip	3	97689824	97888707	-	198884	-1.50525	0.00663896	0.30885	922.135	657.537	559.848	479.85	813.898	3843.43	2134.35	645.939	1449	495	413	464	633	3079	4951	597	down
ENSMUSG00000038244.13	Mical2	7	112225856	112355194	+	129339	-8.15668	1.19219e-06	0.000200798	0	0	0	0	20.5725	12.4827	49.576	136.329	0	0	0	0	16	10	115	126	down
ENSMUSG00000038279.10	Nop2	6	125131909	125144753	+	12845	-2.09444	0.0163297	0.516472	78.9129	55.791	27.1113	18.6149	221.154	12.4827	320.735	217.477	124	42	20	18	172	10	744	201	down
ENSMUSG00000038352.15	Arl5c	11	97989578	97996181	-	6604	-4.50625	0.00434818	0.232894	0	22.5821	21.689	14.4782	0	812.625	483.258	32.4592	0	17	16	14	0	651	1121	30	down
ENSMUSG00000038418.7	Egr1	18	34859823	34864984	+	5162	-1.57206	0.00411333	0.225499	1447.8	2157.25	1718.85	1205.83	2372.26	1532.88	4828.27	10679.1	2275	1624	1268	1166	1845	1228	11200	9870	down
ENSMUSG00000038543.13	BC028528	3	95883954	95892005	-	8052	-2.63792	0.0106788	0.409071	42.6384	11.9552	17.6223	0	64.289	159.779	75.8728	153.64	67	9	13	0	50	128	176	142	down
ENSMUSG00000038580.13	Sct	7	141278330	141279133	-	804	-7.4874	7.5091e-06	0.0011997	0	0	0	0	36.0018	69.9032	13.7951	18.3936	0	0	0	0	28	56	32	17	down
ENSMUSG00000038619.12	Ensa	3	95624993	95632102	+	7110	-1.5286	0.00893433	0.366452	218.92	1349.61	212.823	428.142	1758.95	1164.64	1821.38	1625.13	344	1016	157	414	1368	933	4225	1502	down
ENSMUSG00000038642.10	Ctss	3	95526786	95556403	+	29618	-7.54584	0.000932057	0.0792079	0	21.2537	14.9112	0	2134.39	4573.67	8.62191	4.3279	0	16	11	0	1660	3664	20	4	down
ENSMUSG00000038677.13	Scube3	17	28142316	28174852	+	32537	-7.94501	0.00941039	0.378025	0	0	0	0	0	0	154.332	34.6232	0	0	0	0	0	0	358	32	down
ENSMUSG00000038811.13	Gngt2	11	95837216	95845734	+	8519	-8.85032	0.0021191	0.145889	0	0	0	0	127.292	227.185	0	0	0	0	0	0	99	182	0	0	down
ENSMUSG00000038880.13	Mrps34	17	24895116	24897502	+	2387	-1.25755	0.0443763	0.759769	354.472	127.522	90.8227	146.851	203.153	197.227	519.47	803.907	557	96	67	142	158	158	1205	743	down
ENSMUSG00000038936.13	Sccpdh	1	179668210	179687189	+	18980	-1.59346	0.0203901	0.574177	404.747	62.4328	275.179	132.372	383.162	197.227	1072.13	988.925	636	47	203	128	298	158	2487	914	down
ENSMUSG00000038987.8	Cfap157	2	32777381	32784428	-	7048	-6.1461	0.0269765	0.650689	0	0	0	0	15.4293	0	19.3993	19.4755	0	0	0	0	12	0	45	18	down
ENSMUSG00000039202.12	Abhd2	7	79273199	79365508	+	92310	-1.22356	0.0228146	0.594908	926.59	599.089	393.113	492.259	747.038	485.578	1928.72	2470.15	1456	451	290	476	581	389	4474	2283	down
ENSMUSG00000039680.9	Mrps6	16	92058270	92112227	+	53958	-1.18875	0.0245809	0.620829	588.665	356	215.535	449.859	738.037	278.365	1409.68	1245.35	925	268	159	435	574	223	3270	1151	down
ENSMUSG00000039747.11	Orai2	5	136147459	136170713	-	23255	-6.27529	0.0221539	0.590757	0	0	0	0	24.4298	19.9724	15.0883	0	0	0	0	0	19	16	35	0	down
ENSMUSG00000039865.8	Slc44a3	3	121459528	121532404	-	72877	-1.07073	0.0412839	0.741659	305.469	373.269	142.334	130.304	399.877	304.578	368.587	926.171	480	281	105	126	311	244	855	856	down
ENSMUSG00000039886.8	Tmem120a	5	135735485	135744448	-	8964	-1.15074	0.0202423	0.572017	510.388	179.328	146.401	359.887	410.164	545.495	1041.96	661.087	802	135	108	348	319	437	2417	611	down
ENSMUSG00000039908.14	Slc26a11	11	119355557	119381079	+	25523	-8.14129	0.000209553	0.0235297	0	0	0	0	60.4316	88.6273	67.682	0	0	0	0	0	47	71	157	0	down
ENSMUSG00000039958.17	Etfbkmt	6	149139849	149151171	+	11323	-1.31695	0.0235777	0.60589	223.374	257.701	399.891	225.447	426.879	430.654	272.021	1626.21	351	194	295	218	332	345	631	1503	down
ENSMUSG00000040298.6	Btbd16	7	130774069	130825899	+	51831	-5.11448	0.0402001	0.739931	3.18197	0	0	0	2.57156	8.7379	0	108.197	5	0	0	0	2	7	0	100	down
ENSMUSG00000040552.8	C3ar1	6	122847138	122856161	-	9024	-10.8057	0.0014053	0.110076	0	0	0	0	754.752	617.895	1.72438	0	0	0	0	0	587	495	4	0	down
ENSMUSG00000040562.12	Gstm2	3	107981702	107986453	-	4752	-1.51208	0.0242158	0.616061	501.479	114.239	153.179	429.176	164.58	847.577	1138.95	1269.16	788	86	113	415	128	679	2642	1173	down
ENSMUSG00000040569.13	Slc26a7	4	14502430	14621805	-	119376	-8.91734	0.00171965	0.127532	0	0	0	0	0	0	37.9364	333.248	0	0	0	0	0	0	88	308	down
ENSMUSG00000040624.17	Plekhg1	10	3740364	3967303	+	226940	-1.11927	0.026189	0.640096	649.758	2278.13	2536.26	2183.11	2963.72	6277.56	1836.04	5533.22	1021	1715	1871	2111	2305	5029	4259	5114	down
ENSMUSG00000040659.3	Efhd2	4	141858142	141874920	-	16779	-3.08211	0.000108522	0.0135454	18.4554	10.6269	27.1113	171.67	439.736	425.661	602.672	463.085	29	8	20	166	342	341	1398	428	down
ENSMUSG00000040706.4	Agmat	4	141746672	141759263	+	12592	-6.76492	0.0457968	0.763525	0	0	0	0	0	0	9.9152	73.5743	0	0	0	0	0	0	23	68	down
ENSMUSG00000040767.10	Snrnp25	11	32205415	32208984	+	3570	-2.65034	0.00178486	0.131014	134.279	103.612	92.1783	220.276	172.294	111.096	631.555	2541.56	211	78	68	213	134	89	1465	2349	down
ENSMUSG00000040950.13	Mgl2	11	70130329	70137550	+	7222	-8.97266	8.81951e-05	0.011416	0	0	0	0	335.588	38.6964	11.6396	0	0	0	0	0	261	31	27	0	down
ENSMUSG00000041120.6	Nbl1	4	139082284	139092993	-	10710	-9.37053	0.000491457	0.0480442	0	0	0	0	0	0	241.845	266.166	0	0	0	0	0	0	561	246	down
ENSMUSG00000041548.4	Hspb8	5	116408491	116422864	-	14374	-24.974	1.57224e-13	3.3814e-10	0	0	0	0	0	0	514.297	860.17	0	0	0	0	0	0	1193	795	down
ENSMUSG00000041596.12	Nlrp5-ps	7	14530652	14622479	-	91828	-1.29652	0.0194963	0.563116	56.0027	30.5522	32.5335	42.4005	56.5743	64.9101	111.223	165.542	88	23	24	41	44	52	258	153	down
ENSMUSG00000041605.16	5730559C18Rik	1	136213531	136234264	-	20734	-20.9587	6.19509e-10	1.58907e-07	0	0	0	0	0	0	61.2156	0	0	0	0	0	0	0	142	0	down
ENSMUSG00000041660.8	Bbox1	2	110262697	110314560	-	51864	-7.63154	0.00184757	0.133883	0	0	0	0	0	122.331	11.6396	18.3936	0	0	0	0	0	98	27	17	down
ENSMUSG00000041797.7	Abca9	11	110100749	110168196	-	67448	-1.53997	0.0454658	0.763358	12.7279	122.209	101.667	88.9376	75.861	473.095	235.809	159.05	20	92	75	86	59	379	547	147	down
ENSMUSG00000041805.3	Pramel1	4	143394428	143400160	+	5733	-6.93647	0.040544	0.740452	0	0	0	0	6.4289	0	0	87.64	0	0	0	0	5	0	0	81	down
ENSMUSG00000041831.15	Sytl3	17	6673458	6738042	+	64585	-8.42422	1.05279e-06	0.000178394	0	0	0	0	20.5725	19.9724	199.597	22.7215	0	0	0	0	16	16	463	21	down
ENSMUSG00000041921.16	Metap1d	2	71453276	71525194	+	71919	-1.22189	0.033726	0.708491	116.46	25.2388	37.9558	68.2545	123.435	118.586	149.159	191.51	183	19	28	66	96	95	346	177	down
ENSMUSG00000041939.14	Mvk	5	114444269	114460591	+	16323	-2.53544	0.00634964	0.299881	224.011	99.6268	48.8003	86.8693	118.292	42.4412	1022.13	1483.39	352	75	36	84	92	34	2371	1371	down
ENSMUSG00000042184.11	1700069L16Rik	5	113692422	113724772	-	32351	-1.60613	0.03889	0.73717	23.5466	18.597	10.8445	14.4782	82.2899	12.4827	72.4241	38.9511	37	14	8	14	64	10	168	36	down
ENSMUSG00000042225.3	Ammecr1	X	142851146	142966728	-	115583	-1.75357	0.00128414	0.103468	323.288	196.597	193.846	166.5	401.163	264.634	904.008	1400.08	508	148	143	161	312	212	2097	1294	down
ENSMUSG00000042243.10	BC051665	13	60781887	60786364	-	4478	-6.91378	0.0412079	0.740922	0	0	0	0	0	0	18.9682	73.5743	0	0	0	0	0	0	44	68	down
ENSMUSG00000042265.13	Trem1	17	48232768	48246924	+	14157	-1.97775	0.002266	0.151206	8.27312	22.5821	10.8445	25.854	96.4334	59.9171	42.6785	66.0005	13	17	8	25	75	48	99	61	down
ENSMUSG00000042286.13	Stab1	14	31139013	31168641	-	29629	-3.58551	0.00879385	0.36268	29.9105	0	0	13.4441	72.0036	334.537	34.0566	88.7219	47	0	0	13	56	268	79	82	down
ENSMUSG00000042389.13	Tsen2	6	115544664	115578628	+	33965	-2.34981	0.0360618	0.72328	64.9122	0	21.689	39.298	84.8614	28.7103	268.141	262.92	102	0	16	38	66	23	622	243	down
ENSMUSG00000042485.6	Mustn1	14	30879257	30881608	+	2352	-4.19228	0.0153811	0.498886	0	0	5.42225	0	11.572	39.9447	16.3816	24.8854	0	0	4	0	9	32	38	23	down
ENSMUSG00000042558.16	Adprhl2	4	126316047	126321703	-	5657	-2.08142	0.0428629	0.751289	108.823	0	39.3113	88.9376	142.721	132.317	328.495	402.495	171	0	29	86	111	106	762	372	down
ENSMUSG00000042647.13	Acad12	5	121596775	121618938	-	22164	-7.69035	0.0135119	0.45736	0	0	0	0	0	87.379	71.1308	0	0	0	0	0	0	70	165	0	down
ENSMUSG00000042734.6	Ttc9	12	81631249	81667557	+	36309	-2.16672	0.0404708	0.740452	287.014	49.1492	56.9337	292.667	52.7169	47.4343	967.81	2013.56	451	37	42	283	41	38	2245	1861	down
ENSMUSG00000042750.7	Bex2	X	136066564	136068236	-	1673	-7.90494	5.19711e-05	0.00712284	3.81837	0	0	0	27.0014	0	111.223	876.4	6	0	0	0	21	0	258	810	down
ENSMUSG00000042940.8	9230106D20Rik	10	19644750	19660801	+	16052	-7.93216	0.0108558	0.410746	0	0	0	0	99.005	88.6273	0	0	0	0	0	0	77	71	0	0	down
ENSMUSG00000042961.13	Egflam	15	7206120	7398395	-	192276	-1.2488	0.0218222	0.588399	34.3653	67.7463	70.4893	118.928	146.579	171.013	273.746	98.4597	54	51	52	115	114	137	635	91	down
ENSMUSG00000043061.10	Tmem18	12	30584426	30591215	+	6790	-7.85024	0.000770712	0.0684074	0	0	0	0	39.8592	0	17.2438	120.099	0	0	0	0	31	0	40	111	down
ENSMUSG00000043079.17	Synpo	18	60593973	60660142	-	66170	-1.42873	0.0201281	0.571068	398.383	261.687	290.091	196.49	470.595	180.999	714.757	1721.42	626	197	214	190	366	145	1658	1591	down
ENSMUSG00000043487.4	Acot6	12	84100654	84111349	+	10696	-4.25084	0.0213507	0.584854	0	0	0	3.10248	25.7156	4.99309	9.4841	19.4755	0	0	0	3	20	4	22	18	down
ENSMUSG00000043664.7	Tmem221	8	71554238	71558871	-	4634	-7.02882	0.0379349	0.73298	0	0	0	0	73.2894	0	0	27.0494	0	0	0	0	57	0	0	25	down
ENSMUSG00000043832.13	Clec4a3	6	122952515	122969875	+	17361	-7.96151	0.0124025	0.440255	0	0	0	0	16.7151	174.758	0	0	0	0	0	0	13	140	0	0	down
ENSMUSG00000043903.3	Zfp469	8	122269569	122272650	+	3082	-3.46157	0.023641	0.605893	0	2.65672	0	12.4099	11.572	29.9585	100.014	23.8034	0	2	0	12	9	24	232	22	down
ENSMUSG00000043953.12	Ccrl2	9	111054486	111057519	-	3034	-9.16997	6.2754e-10	1.59503e-07	0	0	0	0	43.7165	235.923	28.8834	134.165	0	0	0	0	34	189	67	124	down
ENSMUSG00000044014.9	Npy5r	8	66679965	66688128	-	8164	-21.3053	3.17947e-10	1.18843e-07	0	0	0	0	0	0	78.8905	0	0	0	0	0	0	0	183	0	down
ENSMUSG00000044068.6	Zrsr1	11	22973215	22976496	+	3282	-3.58689	0.025372	0.63168	0	0	16.2668	6.20495	54.0027	3.74482	27.159	181.772	0	0	12	6	42	3	63	168	down
ENSMUSG00000044217.16	Aqp5	15	99590849	99594829	+	3981	-7.28849	0.025688	0.636425	0	0	0	0	0	0	30.1767	89.8039	0	0	0	0	0	0	70	83	down
ENSMUSG00000044258.10	Ctla2a	13	60934155	60936625	-	2471	-25.202	9.45503e-14	2.63209e-10	0	0	0	0	389.591	1013.6	0	0	0	0	0	0	303	812	0	0	down
ENSMUSG00000044265.16	Olfm5	7	104153013	104164831	-	11819	-7.22733	0.027675	0.657964	0	0	0	0	0	0	34.9187	80.0661	0	0	0	0	0	0	81	74	down
ENSMUSG00000044434.5	Gm9791	3	34005017	34005463	-	447	-1.20143	0.00226308	0.151206	127.279	116.895	157.245	92.0401	279.014	199.724	213.392	442.528	200	88	116	89	217	160	495	409	down
ENSMUSG00000044469.7	Tnfaip8l1	17	56162477	56173955	+	11479	-7.75332	0.0125469	0.443474	0	0	0	0	0	0	37.9364	127.673	0	0	0	0	0	0	88	118	down
ENSMUSG00000044550.11	Tceal3	X	136590842	136668378	+	77537	-7.061	0.0359687	0.722259	0	0	0	0	0	0	22.417	80.0661	0	0	0	0	0	0	52	74	down
ENSMUSG00000044583.13	Tlr7	X	167304929	167330558	-	25630	-7.1529	0.0309327	0.679911	0	0	0	0	0	67.4067	41.8163	0	0	0	0	0	0	54	97	0	down
ENSMUSG00000044707.7	Ccnjl	11	43528784	43586997	+	58214	-3.04664	0.00663814	0.30885	33.7289	0	5.42225	12.4099	51.4312	39.9447	95.2721	246.69	53	0	4	12	40	32	221	228	down
ENSMUSG00000044786.6	Zfp36	7	28376784	28380253	-	3470	-1.35982	0.0126562	0.444541	532.026	842.179	947.539	1054.84	1123.77	823.859	1811.9	4904.59	836	634	699	1020	874	660	4203	4533	down
ENSMUSG00000044811.13	Cd300c2	11	114996721	115001880	-	5160	-9.53078	0.00051232	0.0495639	0	0	0	0	302.158	265.882	0	0	0	0	0	0	235	213	0	0	down
ENSMUSG00000044827.10	Tlr1	5	64924679	64933563	-	8885	-7.42163	0.0239382	0.611221	0	0	0	0	65.5747	66.1584	0	0	0	0	0	0	51	53	0	0	down
ENSMUSG00000044938.8	Klhl31	9	77636500	77660127	+	23628	-21.3371	2.98975e-10	1.18843e-07	0	0	0	0	0	0	0	81.1481	0	0	0	0	0	0	0	75	down
ENSMUSG00000044949.4	Ubtd2	11	32455370	32516687	+	61318	-1.35789	0.0178938	0.533804	27.3649	34.5373	43.378	26.8881	111.863	39.9447	59.4912	126.591	43	26	32	26	87	32	138	117	down
ENSMUSG00000045176.3	Borcs6	11	69059717	69061578	+	1862	-4.47073	0.000385207	0.0393066	0	5.31343	4.06669	0	30.8587	31.2068	73.2863	58.4266	0	4	3	0	24	25	170	54	down
ENSMUSG00000045411.16	2410002F23Rik	7	44246722	44252319	+	5598	-1.58578	0.0201424	0.571068	23.5466	151.433	113.867	52.7421	271.299	87.379	278.057	384.101	37	114	84	51	211	70	645	355	down
ENSMUSG00000045502.6	Hcar2	5	123863570	123865499	-	1930	-22.2788	4.67067e-11	3.8408e-08	0	0	0	0	0	0	162.523	0	0	0	0	0	0	0	377	0	down
ENSMUSG00000045639.14	Zfp629	7	127607031	127615797	-	8767	-6.12124	0.0339315	0.708491	0	0	0	0	0	9.98618	5.60424	37.8691	0	0	0	0	0	8	13	35	down
ENSMUSG00000045665.4	Mfsd5	15	102279456	102281744	+	2289	-1.73157	0.00517268	0.262489	206.828	123.537	281.957	63.0837	366.447	184.744	870.813	819.055	325	93	208	61	285	148	2020	757	down
ENSMUSG00000045777.14	Ifitm10	7	142325837	142373753	-	47917	-3.41025	0.0145604	0.48135	38.82	42.5075	0	0	27.0014	288.351	366	185.018	61	32	0	0	21	231	849	171	down
ENSMUSG00000045948.8	Mrps12	7	28739641	28741820	-	2180	-1.32297	0.00791907	0.344874	453.749	164.716	305.002	238.891	491.168	348.268	1288.11	781.186	713	124	225	231	382	279	2988	722	down
ENSMUSG00000046186.8	Cd109	9	78615546	78716253	+	100708	-7.01923	0.0373292	0.730958	0	0	0	0	0	38.6964	60.7845	0	0	0	0	0	0	31	141	0	down
ENSMUSG00000046280.9	She	3	89831370	89858834	+	27465	-6.14647	0.0291085	0.671488	0	0	0	0	16.7151	0	28.8834	8.6558	0	0	0	0	13	0	67	8	down
ENSMUSG00000046295.13	Ankle1	8	71406010	71409904	+	3895	-22.2097	5.34716e-11	4.13432e-08	0	0	0	0	0	0	0	176.362	0	0	0	0	0	0	0	163	down
ENSMUSG00000046404.5	Yod1	1	130717327	130724358	+	7032	-8.99463	1.60935e-05	0.00242043	0	0	0	0	177.438	0	44.4029	169.87	0	0	0	0	138	0	103	157	down
ENSMUSG00000046688.14	Tifa	3	127789805	127832164	+	42360	-8.28986	2.17033e-06	0.000361192	0	0	0	0	36.0018	158.531	40.523	5.40987	0	0	0	0	28	127	94	5	down
ENSMUSG00000046761.12	Fam83h	15	76001093	76014336	-	13244	-7.20489	0.028991	0.671488	0	0	0	0	39.8592	0	73.2863	0	0	0	0	0	31	0	170	0	down
ENSMUSG00000046805.9	Mpeg1	19	12460779	12465284	+	4506	-24.0872	1.09325e-12	1.45553e-09	0	0	0	0	444.88	174.758	0	0	0	0	0	0	346	140	0	0	down
ENSMUSG00000046841.5	Ckap4	10	84526305	84534062	-	7758	-2.02494	0.0149289	0.491633	245.648	51.806	47.4447	148.919	286.729	53.6757	1034.2	638.365	386	39	35	144	223	43	2399	590	down
ENSMUSG00000047003.14	Zfp41	15	75616679	75625300	+	8622	-1.38788	0.0407305	0.740452	91.0044	62.4328	90.8227	26.8881	129.864	144.8	61.6467	374.363	143	47	67	26	101	116	143	346	down
ENSMUSG00000047026.9	Acsm4	7	119690026	119714565	+	24540	-3.89561	0.00269843	0.173633	14.0007	19.9254	0	0	51.4312	63.6619	98.2898	293.215	22	15	0	0	40	51	228	271	down
ENSMUSG00000047592.17	Nxpe5	5	138225898	138253363	+	27466	-9.06313	0.00140553	0.110076	0	0	0	0	132.435	278.365	0	0	0	0	0	0	103	223	0	0	down
ENSMUSG00000047898.7	Ccr4	9	114490316	114504916	-	14601	-6.7025	0.0478457	0.771747	0	0	0	0	47.5738	0	0	32.4592	0	0	0	0	37	0	0	30	down
ENSMUSG00000048106.5	4632415L05Rik	3	19894886	19898984	+	4099	-5.04446	0.00410639	0.225499	1.27279	0	5.42225	0	0	62.4136	69.8375	83.3121	2	0	4	0	0	50	162	77	down
ENSMUSG00000048216.13	Gpr85	6	13834458	13839942	-	5485	-21.7181	1.42093e-10	7.357e-08	0	0	0	0	0	0	0	108.197	0	0	0	0	0	0	0	100	down
ENSMUSG00000048583.16	Igf2	7	142650766	142666816	-	16051	-1.28189	0.0307011	0.679091	45.184	39.8507	33.8891	40.3322	64.289	38.6964	114.24	169.87	71	30	25	39	50	31	265	157	down
ENSMUSG00000048728.15	Zfp454	11	50872720	50887651	-	14932	-6.94613	0.0402643	0.740213	0	0	0	0	0	0	72.8552	21.6395	0	0	0	0	0	0	169	20	down
ENSMUSG00000048758.14	Rpl29	9	106429454	106431568	+	2115	-1.42056	0.00354891	0.206717	1121.33	545.955	299.579	400.219	1092.91	957.425	1883.89	2407.39	1762	411	221	387	850	767	4370	2225	down
ENSMUSG00000048763.11	Hoxb3	11	96323326	96347930	+	24605	-6.965	0.00546621	0.273399	0	0	0	0	0	44.9378	14.2262	36.7871	0	0	0	0	0	36	33	34	down
ENSMUSG00000049037.8	Clec4a1	6	122921848	122934619	+	12772	-8.09681	0.00996505	0.391333	0	0	0	0	191.581	18.7241	0	0	0	0	0	0	149	15	0	0	down
ENSMUSG00000049130.6	C5ar1	7	16246743	16259540	-	12798	-24.2067	8.45109e-13	1.20986e-09	0	0	0	0	167.151	505.55	0	0	0	0	0	0	130	405	0	0	down
ENSMUSG00000049191.12	Rgag4	X	102066544	102071304	-	4761	-6.20533	0.0433439	0.753678	0	0	0	0	0	52.4274	2.15548	2.16395	0	0	0	0	0	42	5	2	down
ENSMUSG00000049300.11	Prmt6	3	110246109	110250998	-	4890	-2.10395	0.0136594	0.46068	96.0955	19.9254	5.42225	18.6149	113.149	83.6342	187.527	223.969	151	15	4	18	88	67	435	207	down
ENSMUSG00000049303.10	Syt12	19	4445908	4477447	-	31540	-6.91969	2.99474e-07	5.23311e-05	0	0	0	4.13663	70.7179	52.4274	62.0778	319.183	0	0	0	4	55	42	144	295	down
ENSMUSG00000049396.6	Gemin4	11	76210571	76217664	-	7094	-6.6801	0.0164038	0.517063	0	0	0	0	3.85734	11.2344	63.3711	0	0	0	0	0	3	9	147	0	down
ENSMUSG00000049504.12	Proser1	3	53463666	53481755	+	18090	-2.12656	0.00208358	0.144926	19.7282	59.7761	21.689	49.6396	83.5756	66.1584	198.735	307.281	31	45	16	48	65	53	461	284	down
ENSMUSG00000049551.2	Fzd9	5	135248938	135251230	-	2293	-7.48923	0.0216845	0.587927	0	0	0	0	68.1463	69.9032	0	0	0	0	0	0	53	56	0	0	down
ENSMUSG00000049641.14	Vgll2	10	52022502	52028471	+	5970	-1.73535	0.0199554	0.568159	12.7279	27.8955	25.7557	32.0589	178.723	33.7033	37.9364	76.8202	20	21	19	31	139	27	88	71	down
ENSMUSG00000049680.17	Urgcp	11	5713417	5762376	-	48960	-3.56739	0.0275498	0.656663	0	5.31343	0	28.9564	41.1449	103.607	4.31096	257.51	0	4	0	28	32	83	10	238	down
ENSMUSG00000049804.9	Armcx4	X	134686519	134696757	+	10239	-5.31832	0.0482689	0.774351	5.09115	0	0	0	0	0	168.127	44.361	8	0	0	0	0	0	390	41	down
ENSMUSG00000049866.12	Arl4c	1	88673125	88702221	-	29097	-3.7044	0.0221791	0.590757	10.1823	0	17.6223	33.0931	25.7156	0	673.803	94.1318	16	0	13	32	20	0	1563	87	down
ENSMUSG00000049871.13	Nlrc3	16	3945007	3976632	-	31626	-6.98694	0.0390999	0.737499	0	0	0	0	3.85734	93.6204	0	0	0	0	0	0	3	75	0	0	down
ENSMUSG00000049892.7	Rasd1	11	59963181	59964944	-	1764	-5.29404	0.00789848	0.344514	5.72755	15.9403	59.6448	0	6.4289	42.4412	21.1237	3111.76	9	12	44	0	5	34	49	2876	down
ENSMUSG00000049929.7	Lpar4	X	106920625	106933900	+	13276	-6.67128	0.048899	0.779361	0	0	0	0	43.7165	0	34.4877	0	0	0	0	0	34	0	80	0	down
ENSMUSG00000050069.3	Grem2	1	174833785	174921819	-	88035	-7.61187	0.00138503	0.109082	0	0	0	0	14.1436	0	91.3923	44.361	0	0	0	0	11	0	212	41	down
ENSMUSG00000050071.8	Bex1	X	136213972	136215513	-	1542	-2.17401	0.024478	0.618788	197.919	17.2687	27.1113	58.947	86.1472	57.4205	408.248	812.563	311	13	20	57	67	46	947	751	down
ENSMUSG00000050074.12	Spink8	9	109812280	109826633	+	14354	-6.66404	0.049146	0.781168	0	0	0	0	0	0	34.4877	43.279	0	0	0	0	0	0	80	40	down
ENSMUSG00000050108.12	Bpifc	10	85959340	86011895	-	52556	-1.43666	0.000542222	0.0519177	346.198	333.418	374.135	118.928	939.905	645.357	588.446	1000.83	544	251	276	115	731	517	1365	925	down
ENSMUSG00000050157.6	Gm867	10	75937723	75940672	-	2950	-7.11735	0.0355697	0.719083	0	0	0	0	12.8578	0	93.5478	0	0	0	0	0	10	0	217	0	down
ENSMUSG00000050248.11	Evc2	5	37338499	37425055	+	86557	-3.77993	0.0341553	0.710527	9.54591	0	33.8891	0	150.436	0	184.509	259.674	15	0	25	0	117	0	428	240	down
ENSMUSG00000050345.9	4930486L24Rik	13	60842612	60864475	-	21864	-22.6266	2.31451e-11	2.02223e-08	0	0	0	0	0	0	0	210.985	0	0	0	0	0	0	0	195	down
ENSMUSG00000050397.4	Foxl2	9	98955288	98958543	+	3256	-2.85912	0.0224722	0.59255	21.6374	6.64179	6.77782	16.5465	57.8601	0	122	196.919	34	5	5	16	45	0	283	182	down
ENSMUSG00000050635.1	Sprr2f	3	92365187	92366442	+	1256	-5.81317	0.0109768	0.41149	0	6.64179	0	5.17079	0	0	24.1414	635.119	0	5	0	5	0	0	56	587	down
ENSMUSG00000050645.3	Defb19	2	152576086	152580312	-	4227	-4.12353	0.0188994	0.550999	39.4564	0	0	0	10.2862	84.8825	324.615	278.068	62	0	0	0	8	68	753	257	down
ENSMUSG00000050777.7	Tmem37	1	120067377	120074074	-	6698	-1.43923	0.0397763	0.737959	106.278	77.0448	142.334	9.30743	162.008	237.172	240.12	268.33	167	58	105	9	126	190	557	248	down
ENSMUSG00000050786.8	Ccdc126	6	49319274	49341582	+	22309	-3.46315	0.00820692	0.351389	36.2745	0	0	9.30743	56.5743	167.268	88.3746	200.165	57	0	0	9	44	134	205	185	down
ENSMUSG00000050875.11	A730017C20Rik	18	59062248	59076962	+	14715	-8.02407	0.0083942	0.355988	0	0	0	0	0	0	31.0389	168.788	0	0	0	0	0	0	72	156	down
ENSMUSG00000050974.4	Gm9847	12	14494561	14495159	+	599	-2.36519	0.0274906	0.656371	48.366	7.97015	2.71113	13.4441	25.7156	31.2068	67.2509	254.264	76	6	2	13	20	25	156	235	down
ENSMUSG00000051037.15	Zfp455	13	67194506	67209298	+	14793	-7.00921	0.0384768	0.737006	0	0	0	0	78.4325	0	0	20.5575	0	0	0	0	61	0	0	19	down
ENSMUSG00000051212.7	Gpr183	14	121952331	121965193	-	12863	-8.01993	0.000699768	0.0635222	0	0	0	0	82.2899	109.848	7.32863	0	0	0	0	0	64	88	17	0	down
ENSMUSG00000051238.6	Swsap1	9	21955755	21958264	+	2510	-1.09122	0.0435955	0.753678	107.551	29.2239	103.023	94.1084	187.724	149.793	265.124	109.279	169	22	76	91	146	120	615	101	down
ENSMUSG00000051242.1	Pcdhb9	18	37400855	37403909	+	3055	-7.05778	0.0351802	0.71834	0	0	0	0	0	0	31.9011	70.3284	0	0	0	0	0	0	74	65	down
ENSMUSG00000051502.6	Ufsp1	5	137294629	137295665	+	1037	-7.34258	0.0022848	0.152097	0	0	0	0	0	42.4412	64.6643	17.3116	0	0	0	0	0	34	150	16	down
ENSMUSG00000051735.7	Rinl	7	28788969	28798963	+	9995	-7.32825	0.00261159	0.169022	0	0	0	0	15.4293	0	74.1485	33.5412	0	0	0	0	12	0	172	31	down
ENSMUSG00000051906.15	Cd209f	8	4102787	4105835	-	3049	-1.49114	0.00354212	0.206717	41.3656	47.8209	35.2446	77.5619	70.7179	151.041	140.537	205.575	65	36	26	75	55	121	326	190	down
ENSMUSG00000052102.14	Gnpda1	18	38327558	38339003	-	11446	-1.51555	0.00912536	0.371377	365.927	41.1791	135.556	217.173	426.879	630.377	542.318	578.857	575	31	100	210	332	505	1258	535	down
ENSMUSG00000052117.5	D630039A03Rik	4	57908483	57916297	-	7815	-21.8928	1.00743e-10	5.86808e-08	0	0	0	0	0	0	0	122.263	0	0	0	0	0	0	0	113	down
ENSMUSG00000052415.5	Tchh	3	93442330	93449077	+	6748	-5.82368	0.0498499	0.785159	0	0	0	0	24.4298	8.7379	10.3463	0	0	0	0	0	19	7	24	0	down
ENSMUSG00000052684.4	Jun	4	95049034	95052222	-	3189	-3.26975	0.000997454	0.0837472	341.107	102.284	33.8891	159.26	281.586	112.344	797.096	4956.53	536	77	25	154	219	90	1849	4581	down
ENSMUSG00000052726.15	Kcnt2	1	140246158	140612067	+	365910	-7.4238	0.00208378	0.144926	0	0	0	0	12.8578	0	58.1979	60.5906	0	0	0	0	10	0	135	56	down
ENSMUSG00000052776.10	Oas1a	5	120896256	120907521	-	11266	-21.6856	1.51473e-10	7.70005e-08	0	0	0	0	105.434	0	0	0	0	0	0	0	82	0	0	0	down
ENSMUSG00000052821.3	Cysltr1	X	106574346	106603679	-	29334	-7.33843	0.0269967	0.650689	0	0	0	0	69.4321	54.924	0	0	0	0	0	0	54	44	0	0	down
ENSMUSG00000052837.6	Junb	8	84974484	84978718	-	4235	-1.29236	0.0107574	0.409648	2462.21	1842.43	1710.72	2168.63	2421.12	1677.68	6583.69	9362.33	3869	1387	1262	2097	1883	1344	15272	8653	down
ENSMUSG00000052848.7	C130026L21Rik	5	111581422	111604932	+	23511	-21.9475	9.03946e-11	5.37733e-08	0	0	0	0	0	127.324	0	0	0	0	0	0	0	102	0	0	down
ENSMUSG00000052889.11	Prkcb	7	122288751	122634402	+	345652	-2.57498	0.0157003	0.504564	0.636394	35.8657	281.957	34.1272	717.465	401.944	430.233	546.397	1	27	208	33	558	322	998	505	down
ENSMUSG00000053158.10	Fes	7	80377756	80387946	-	10191	-21.3183	3.09874e-10	1.18843e-07	0	0	0	0	81.0041	0	0	0	0	0	0	0	63	0	0	0	down
ENSMUSG00000053175.17	Bcl3	7	19808462	19822770	-	14309	-2.5075	0.0139275	0.46579	126.006	33.2089	82.6893	34.1272	36.0018	24.9654	942.806	566.955	198	25	61	33	28	20	2187	524	down
ENSMUSG00000053291.15	Rab4b	7	27168424	27178896	-	10473	-1.15367	0.0409673	0.740452	397.746	178	92.1783	106.518	399.877	300.834	715.619	309.445	625	134	68	103	311	241	1660	286	down
ENSMUSG00000053318.7	Slamf8	1	172581758	172590568	-	8811	-22.8597	1.43841e-11	1.38678e-08	0	0	0	0	249.441	0	0	0	0	0	0	0	194	0	0	0	down
ENSMUSG00000053329.7	D10Jhu81e	10	78162066	78169782	-	7717	-1.07866	0.0342741	0.712185	238.011	123.537	173.512	148.919	280.3	129.82	453.082	582.103	374	93	128	144	218	104	1051	538	down
ENSMUSG00000053414.7	Hunk	16	90386397	90499553	+	113157	-21.4385	2.45476e-10	1.08941e-07	0	0	0	0	0	0	0	87.64	0	0	0	0	0	0	0	81	down
ENSMUSG00000053436.14	Mapk14	17	28691342	28748404	+	57063	-2.16416	0.00106083	0.0882732	24.8194	175.343	69.1337	96.1767	722.608	352.013	401.781	156.886	39	132	51	93	562	282	932	145	down
ENSMUSG00000053560.4	Ier2	8	84661331	84662852	-	1522	-3.01283	0.0135487	0.45787	1333.25	49.1492	159.956	237.856	621.031	514.288	3503.95	9736.69	2095	37	118	230	483	412	8128	8999	down
ENSMUSG00000054008.8	Ndst1	18	60685978	60713389	-	27412	-1.48735	0.0144851	0.480083	428.93	232.463	200.623	45.503	349.732	580.446	851.414	764.956	674	175	148	44	272	465	1975	707	down
ENSMUSG00000054258.9	Gm5082	13	41649443	41656777	+	7335	-1.10343	0.0166869	0.518965	47.0932	70.403	70.4893	66.1861	97.7192	189.737	175.887	80.0661	74	53	52	64	76	152	408	74	down
ENSMUSG00000054404.13	Slfn5	11	82951349	82964840	+	13492	-7.74179	0.0124065	0.440255	0	0	0	0	0	94.8687	69.4064	0	0	0	0	0	0	76	161	0	down
ENSMUSG00000054474.15	Thnsl2	6	71128166	71144439	-	16274	-4.91028	0.00395146	0.220452	4.45476	0	0	4.13663	0	41.193	113.378	113.607	7	0	0	4	0	33	263	105	down
ENSMUSG00000054514.3	Atad3aos	4	155761178	155769264	+	8087	-7.12225	2.69437e-05	0.00394407	0	0	0	0	46.288	13.731	16.8127	30.2953	0	0	0	0	36	11	39	28	down
ENSMUSG00000054598.13	9130230L23Rik	5	65979358	66004285	-	24928	-3.93125	0.00691769	0.317589	0	0	5.42225	15.5124	24.4298	219.696	34.4877	40.0331	0	0	4	15	19	176	80	37	down
ENSMUSG00000054679.8	Srsf12	4	33208991	33233340	+	24350	-7.95299	0.00904911	0.369349	0	0	0	0	0	139.806	50.4382	0	0	0	0	0	0	112	117	0	down
ENSMUSG00000054763.9	Defb42	14	63046991	63058149	+	11159	-7.47151	0.0202893	0.57242	0	0	0	0	0	0	23.7103	112.525	0	0	0	0	0	0	55	104	down
ENSMUSG00000054889.10	Dsp	13	38151294	38198577	+	47284	-1.95567	0.0202442	0.572017	33.0925	57.1194	32.5335	47.5713	43.7165	39.9447	112.085	464.167	52	43	24	46	34	32	260	429	down
ENSMUSG00000054951.2	9130008F23Rik	17	40875482	40880558	-	5077	-7.4089	0.0023828	0.156755	0	0	0	0	16.7151	0	22.8481	90.8859	0	0	0	0	13	0	53	84	down
ENSMUSG00000055078.7	Gabra5	7	57407672	57510059	-	102388	-1.39083	0.0149593	0.492057	99.2775	86.3433	56.9337	187.183	423.021	107.351	373.329	223.969	156	65	42	181	329	86	866	207	down
ENSMUSG00000055148.7	Klf2	8	72319033	72321656	+	2624	-1.05609	0.025779	0.636425	182.645	159.403	268.401	197.524	171.009	340.778	438.424	728.169	287	120	198	191	133	273	1017	673	down
ENSMUSG00000055430.4	Nap1l5	6	58905233	58907076	-	1844	-3.11237	0.0450355	0.76291	734.399	14.6119	197.912	399.185	99.005	29.9585	2459.4	9056.13	1154	11	146	386	77	24	5705	8370	down
ENSMUSG00000055746.9	Magea2	X	155027201	155093666	-	66466	-6.95612	0.0399765	0.7394	0	0	0	0	0	33.7033	0	61.6726	0	0	0	0	0	27	0	57	down
ENSMUSG00000055782.8	Abcd2	15	91145884	91191807	-	45924	-7.63671	0.000949096	0.0801685	0	0	0	0	0	29.9585	44.8339	77.9022	0	0	0	0	0	24	104	72	down
ENSMUSG00000055799.13	Tcf7l1	6	72626378	72789254	-	162877	-2.64466	0.037621	0.730958	3.18197	0	103.023	10.3416	90.0045	93.6204	180.198	361.38	5	0	76	10	70	75	418	334	down
ENSMUSG00000055978.5	Fut2	7	45648591	45666394	-	17804	-6.34732	0.0271831	0.652932	0	0	0	0	0	7.48963	50.4382	4.3279	0	0	0	0	0	6	117	4	down
ENSMUSG00000056069.8	Fam105a	15	27655071	27681542	-	26472	-3.789	0.0403727	0.740452	0	0	0	36.1955	106.72	353.261	19.8304	21.6395	0	0	0	35	83	283	46	20	down
ENSMUSG00000056078.5	Lipm	19	34100943	34122687	+	21745	-21.3055	3.17698e-10	1.18843e-07	0	0	0	0	0	79.8894	0	0	0	0	0	0	0	64	0	0	down
ENSMUSG00000056185.4	Snx32	19	5495278	5510489	-	15212	-7.02217	0.00652129	0.305408	0	0	0	0	19.2867	9.98618	70.2686	0	0	0	0	0	15	8	163	0	down
ENSMUSG00000056220.14	Pla2g4a	1	149829618	149961290	-	131673	-3.09076	0.0172974	0.530865	849.586	326.776	111.156	171.67	824.184	32.4551	9402.2	2175.85	1335	246	82	166	641	26	21810	2011	down
ENSMUSG00000056492.6	Adgrf5	17	43360451	43459557	+	99107	-5.67597	0.00349699	0.204545	7.63673	0	0	0	12.8578	2.49654	7.75972	390.593	12	0	0	0	10	2	18	361	down
ENSMUSG00000056501.3	Cebpb	2	167688915	167690418	+	1504	-2.07631	0.0104676	0.40423	2662.04	508.761	1130.54	871.796	1105.77	699.032	7622.2	12392.9	4183	383	834	843	860	560	17681	11454	down
ENSMUSG00000056899.10	Immp2l	12	41024090	41955588	+	931499	-2.1747	0.0176839	0.533144	7.63673	77.0448	5.42225	22.7515	84.8614	87.379	78.0283	256.428	12	58	4	22	66	70	181	237	down
ENSMUSG00000056938.16	Acbd4	11	103101682	103112200	+	10519	-4.36572	0.000128859	0.0157326	7.00034	5.31343	5.42225	0	153.008	9.98618	165.11	38.9511	11	4	4	0	119	8	383	36	down
ENSMUSG00000057103.10	Nat8f1	6	85910154	85915687	-	5534	-1.39344	0.0028188	0.179933	41.3656	34.5373	75.9115	37.2297	174.866	108.6	99.5831	112.525	65	26	56	36	136	87	231	104	down
ENSMUSG00000057246.15	BC051142	17	34398820	34460734	+	61915	-8.28306	9.4551e-08	1.69458e-05	0	0	0	0	41.1449	138.558	21.9859	37.8691	0	0	0	0	32	111	51	35	down
ENSMUSG00000057411.8	Fam173a	17	25790508	25792284	-	1777	-1.80012	0.00185394	0.133883	131.097	37.194	28.4668	99.2792	180.009	218.448	328.064	310.527	206	28	21	96	140	175	761	287	down
ENSMUSG00000057534.13	Elobl	11	88964658	88966931	-	2274	-1.03356	0.00157576	0.119719	50886.7	51926.8	37791.7	60751.6	66613.6	67737.5	134366	143472	79961	39091	27879	58745	51808	54265	311686	132602	down
ENSMUSG00000057990.4	E030024N20Rik	19	16164312	16164805	-	494	-2.45426	0.00421663	0.228474	13.3643	3.98507	4.06669	4.13663	63.0032	31.2068	21.9859	29.2133	21	3	3	4	49	25	51	27	down
ENSMUSG00000058163.14	Gm5431	11	48887422	48902214	-	14793	-21.6243	1.70787e-10	8.49853e-08	0	0	0	0	0	101.11	0	0	0	0	0	0	0	81	0	0	down
ENSMUSG00000058297.16	Spock2	10	60106219	60135198	+	28980	-6.40227	0.00270768	0.173633	0	0	0	0	6.4289	26.2137	2.15548	30.2953	0	0	0	0	5	21	5	28	down
ENSMUSG00000058354.6	Krt6a	15	101689932	101694307	-	4376	-6.622	0.0106784	0.409071	0	0	0	0	29.5729	0	25.4346	20.5575	0	0	0	0	23	0	59	19	down
ENSMUSG00000058427.10	Cxcl2	5	90903871	90905938	+	2068	-24.0036	1.30624e-12	1.52172e-09	0	0	0	0	542.599	164.772	0	0	0	0	0	0	422	132	0	0	down
ENSMUSG00000058715.11	Fcer1g	1	171229572	171234365	-	4794	-7.59684	0.0029033	0.18365	9.54591	6.64179	0	0	1215.06	1934.82	4.74205	0	15	5	0	0	945	1550	11	0	down
ENSMUSG00000058921.3	Slc10a5	3	10331734	10335656	-	3923	-5.6568	0.0455553	0.763358	2.54558	0	0	0	0	0	13.364	125.509	4	0	0	0	0	0	31	116	down
ENSMUSG00000059070.16	Rpl18	7	45715457	45720836	+	5380	-1.17622	0.0310426	0.680196	1086.32	358.657	325.335	542.933	684.035	632.874	2129.18	1784.18	1707	270	240	525	532	507	4939	1649	down
ENSMUSG00000059089.4	Fcgr4	1	171018920	171029761	+	10842	-2.42734	5.95979e-05	0.00797271	31.8197	22.5821	13.5556	16.5465	205.725	109.848	78.4594	66.0005	50	17	10	16	160	88	182	61	down
ENSMUSG00000059498.13	Fcgr3	1	171051174	171064935	-	13762	-1.2118	0.0191198	0.556843	204.919	276.298	164.023	243.027	491.168	1046.05	237.534	284.559	322	208	121	235	382	838	551	263	down
ENSMUSG00000059534.8	Uqcr10	11	4701973	4704342	-	2370	-1.04469	0.0271148	0.652411	3314.34	1000.25	1362.34	919.367	2400.55	2576.43	3257.36	5378.5	5208	753	1005	889	1867	2064	7556	4971	down
ENSMUSG00000059791.14	Nrm	17	35861318	35865402	+	4085	-1.97	0.000807841	0.0712505	12.7279	66.4179	40.6669	65.152	201.867	122.331	172.007	223.969	20	50	30	63	157	98	399	207	down
ENSMUSG00000059851.15	Kmt5c	7	4740115	4747514	+	7400	-2.42661	0.00207293	0.144926	75.0945	11.9552	62.3559	10.3416	176.152	77.3929	319.011	288.887	118	9	46	10	137	62	740	267	down
ENSMUSG00000059995.12	Atxn7l3	11	102289300	102296631	-	7332	-8.63625	8.81501e-05	0.011416	0	0	0	0	0	17.4758	101.739	186.1	0	0	0	0	0	14	236	172	down
ENSMUSG00000060568.14	Fam78b	1	167001417	167091302	+	89886	-21.306	3.17215e-10	1.18843e-07	0	0	0	0	0	0	80.6149	0	0	0	0	0	0	0	187	0	down
ENSMUSG00000060600.15	Eno3	11	70657202	70662513	+	5312	-8.56895	5.53603e-05	0.00747738	0	0	0	0	51.4312	0	141.399	98.4597	0	0	0	0	40	0	328	91	down
ENSMUSG00000062012.13	Zfp13	17	23575845	23599487	-	23643	-7.15701	0.0310034	0.680196	0	0	0	0	0	0	80.1838	29.2133	0	0	0	0	0	0	186	27	down
ENSMUSG00000062031.13	Pgghg	7	140941391	140947664	+	6274	-7.87276	0.0108199	0.410466	0	0	0	0	0	0	28.4523	151.476	0	0	0	0	0	0	66	140	down
ENSMUSG00000062075.13	Lmnb2	10	80901203	80918245	-	17043	-1.0702	0.0133472	0.456979	152.735	112.91	63.7115	87.9035	271.299	129.82	234.516	243.444	240	85	47	85	211	104	544	225	down
ENSMUSG00000062252.8	Lhfpl5	17	28575718	28583593	+	7876	-6.56711	0.0166864	0.518965	0	0	0	0	18.0009	38.6964	0	16.2296	0	0	0	0	14	31	0	15	down
ENSMUSG00000062515.3	Fabp4	3	10204088	10208576	-	4489	-8.30541	5.24163e-07	8.99085e-05	0	0	0	3.10248	366.447	592.929	25.8657	4.3279	0	0	0	3	285	475	60	4	down
ENSMUSG00000062526.3	Mppe1	18	67225530	67245830	-	20301	-6.70227	0.0105192	0.405235	0	0	0	0	10.2862	0	24.1414	45.4429	0	0	0	0	8	0	56	42	down
ENSMUSG00000062554.7	Gm12751	4	34354043	34354423	+	381	-1.17346	0.0033655	0.200204	136.825	92.9851	120.645	132.372	216.011	153.537	351.343	367.871	215	70	89	128	168	123	815	340	down
ENSMUSG00000062593.17	Lilrb4a	10	51480612	51496613	+	16002	-22.1794	5.67212e-11	4.13432e-08	0	0	0	0	183.866	0	0	0	0	0	0	0	143	0	0	0	down
ENSMUSG00000062611.4	Rps3a2	14	88123017	88123808	-	792	-1.28756	0.044269	0.75887	47.7296	18.597	10.8445	25.854	50.1454	61.1653	57.3357	86.558	75	14	8	25	39	49	133	80	down
ENSMUSG00000062761.7	Zfp512	5	31452431	31481754	+	29324	-1.0352	0.0400561	0.7394	87.186	69.0746	107.089	203.729	388.305	152.289	199.166	218.559	137	52	79	197	302	122	462	202	down
ENSMUSG00000063856.7	Gpx1	9	108338903	108340343	+	1441	-1.36383	0.0370199	0.730782	290.196	223.164	1676.83	595.675	2028.96	3086.98	867.364	1184.76	456	168	1237	576	1578	2473	2012	1095	down
ENSMUSG00000063873.10	Slc24a3	2	145167754	145642166	+	474413	-1.02552	0.0372275	0.730958	425.111	297.552	719.804	595.675	509.169	1711.38	543.181	1386.01	668	224	531	576	396	1371	1260	1281	down
ENSMUSG00000063888.6	Rpl7l1	17	46773907	46782656	-	8750	-1.22602	0.0472066	0.771747	760.491	166.045	332.113	252.335	704.607	244.661	1250.61	1337.32	1195	125	245	244	548	196	2901	1236	down
ENSMUSG00000063904.3	4930533O14Rik	19	4907229	4928287	-	21059	-2.5827	0.0009573	0.080618	152.098	38.5224	67.7782	192.353	419.164	76.1446	1282.08	926.171	239	29	50	186	326	61	2974	856	down
ENSMUSG00000063975.13	Slco1a5	6	142234227	142322981	-	88755	-1.34667	0.000424507	0.0423886	318.197	662.851	493.425	245.096	771.467	1004.86	1433.82	1155.55	500	499	364	237	600	805	3326	1068	down
ENSMUSG00000064330.9	Pde6h	6	136923832	136968865	+	45034	-2.43895	0.0453385	0.763358	9.54591	42.5075	10.8445	0	101.577	129.82	97.8587	9.73777	15	32	8	0	79	104	227	9	down
ENSMUSG00000064702.1	Gm24950	11	101641748	101641938	+	191	-2.15573	0.0372488	0.730958	10.8187	1.32836	5.42225	7.23911	29.5729	4.99309	35.7809	42.197	17	1	4	7	23	4	83	39	down
ENSMUSG00000065767.1	Gm23849	11	101627366	101627556	+	191	-1.62464	0.0128461	0.446721	87.8224	49.1492	42.0225	46.5371	156.865	37.4482	259.088	243.444	138	37	31	45	122	30	601	225	down
ENSMUSG00000066324.2	Impad1	4	4762484	4793355	-	30872	-1.42833	0.00340133	0.200918	355.108	324.119	147.756	137.543	407.592	410.681	728.552	1050.6	558	244	109	133	317	329	1690	971	down
ENSMUSG00000066595.9	Mfsd7b	1	191005847	191026158	-	20312	-3.55258	0.0005186	0.0499984	3.18197	0	16.2668	27.9223	150.436	64.9101	104.325	234.789	5	0	12	27	117	52	242	217	down
ENSMUSG00000066682.11	Pilrb2	5	137865827	137871815	-	5989	-21.8481	1.10023e-10	6.27784e-08	0	0	0	0	0	118.586	0	0	0	0	0	0	0	95	0	0	down
ENSMUSG00000066748.4	Olfr145	9	37896724	37903519	+	6796	-6.37409	0.0033767	0.200444	0	0	0	0	5.14312	46.1861	3.87986	8.6558	0	0	0	0	4	37	9	8	down
ENSMUSG00000066829.7	Zfp810	9	22276748	22307648	-	30901	-3.21325	0.0151143	0.49367	29.2741	0	0	66.1861	79.7183	252.151	312.544	244.526	46	0	0	64	62	202	725	226	down
ENSMUSG00000068114.6	Ccdc134	15	82127922	82142200	+	14279	-4.98654	0.00152338	0.116386	15.9099	0	0	0	25.7156	62.4136	326.771	111.443	25	0	0	0	20	50	758	103	down
ENSMUSG00000068758.8	Il3ra	14	14346275	14356011	+	9737	-6.54485	0.0133536	0.456979	0	0	0	0	30.8587	16.2275	24.5725	0	0	0	0	0	24	13	57	0	down
ENSMUSG00000068999.12	Vmn2r5	3	64490821	64509735	-	18915	-6.78329	0.0452081	0.76291	0	0	0	0	0	58.6688	0	25.9674	0	0	0	0	0	47	0	24	down
ENSMUSG00000069516.8	Lyz2	10	117277331	117282321	-	4991	-8.44786	2.72452e-07	4.82119e-05	14.6371	33.2089	17.6223	13.4441	8001.4	19481.8	17.6749	19.4755	23	25	13	13	6223	15607	41	18	down
ENSMUSG00000069793.12	Slfn9	11	82978390	82991830	-	13441	-8.32059	0.00471272	0.245826	0	0	0	0	0	0	51.7315	193.674	0	0	0	0	0	0	120	179	down
ENSMUSG00000069972.6	Rps13-ps2	7	88530446	88530898	-	453	-1.2259	0.0483416	0.774438	29.9105	17.2687	17.6223	14.4782	41.1449	29.9585	41.3852	74.6563	47	13	13	14	32	24	96	69	down
ENSMUSG00000070283.4	Ndufaf3	9	108565537	108567434	-	1898	-1.51893	0.0391783	0.737857	282.559	90.3283	82.6893	122.031	113.149	123.579	762.608	657.841	444	68	61	118	88	99	1769	608	down
ENSMUSG00000070313.8	A630095E13Rik	9	36635754	36643376	-	7623	-1.83277	0.00208012	0.144926	4041.74	646.91	649.315	751.833	4876.96	6196.42	4680.84	5949.78	6351	487	479	727	3793	4964	10858	5499	down
ENSMUSG00000070407.5	Hs3st3b1	11	63885792	63922290	-	36499	-3.831	0.00130215	0.104318	14.6371	0	0	21.7173	81.0041	93.6204	131.484	219.641	23	0	0	21	63	75	305	203	down
ENSMUSG00000070462.4	Tlnrd1	7	83879873	83884305	-	4433	-1.79491	0.00133265	0.106035	39.4564	49.1492	12.2001	34.1272	72.0036	128.572	146.141	122.263	62	37	9	33	56	103	339	113	down
ENSMUSG00000070493.3	Chchd2	5	129881156	129887470	-	6315	-1.44123	0.0143746	0.477315	5777.19	1451.9	1453.16	2730.18	4556.8	2635.1	12621.6	11181.1	9078	1093	1072	2640	3544	2111	29278	10334	down
ENSMUSG00000070709.12	Zfp974	7	27907392	27929460	-	22069	-2.72505	0.0154957	0.500861	0.636394	3.98507	21.689	12.4099	15.4293	139.806	27.5901	70.3284	1	3	16	12	12	112	64	65	down
ENSMUSG00000070866.4	Zfp804a	2	82053222	82259879	+	206658	-6.71023	0.00983296	0.388218	0	0	0	0	11.572	0	36.212	32.4592	0	0	0	0	9	0	84	30	down
ENSMUSG00000071001.4	Hrct1	4	43727188	43728639	+	1452	-7.07707	0.00449268	0.238738	0	0	0	0	0	19.9724	19.8304	63.8365	0	0	0	0	0	16	46	59	down
ENSMUSG00000071076.6	Jund	8	70698949	70700616	+	1668	-2.04384	0.00740027	0.328419	1809.91	464.925	885.183	719.774	1350.07	491.819	4107.91	10051.5	2844	350	653	696	1050	394	9529	9290	down
ENSMUSG00000071332.11	E230015B07Rik	6	87672382	87681024	+	8643	-5.71366	0.00702164	0.319736	0	0	0	0	11.572	9.98618	6.89753	11.9017	0	0	0	0	9	8	16	11	down
ENSMUSG00000071547.3	Nt5dc2	14	31134853	31139121	+	4269	-2.35003	0.00979354	0.388218	329.652	119.552	37.9558	88.9376	151.722	88.6273	999.28	1701.95	518	90	28	86	118	71	2318	1573	down
ENSMUSG00000071661.6	Zbtb3	19	8802530	8804854	+	2325	-8.07215	0.00681092	0.313717	0	0	0	0	0	0	98.2898	108.197	0	0	0	0	0	0	228	100	down
ENSMUSG00000071713.4	Csf2rb	15	78325990	78351000	+	25011	-6.29726	0.0174775	0.533144	0	0	0	4.13663	225.011	102.358	0	0	0	0	0	4	175	82	0	0	down
ENSMUSG00000071714.5	Csf2rb2	15	78282517	78305603	-	23087	-6.60045	0.0138097	0.464069	0	0	0	0	10.2862	47.4343	16.8127	0	0	0	0	0	8	38	39	0	down
ENSMUSG00000071721.5	1700010D01Rik	X	95732586	95733265	-	680	-3.10004	0.0166264	0.518845	7.63673	0	0	7.23911	24.4298	27.462	56.4735	23.8034	12	0	0	7	19	22	131	22	down
ENSMUSG00000072100.4	Cldn34b1	X	154886805	154890267	-	3463	-23.4657	4.09192e-12	4.57624e-09	0	0	0	0	0	390.709	0	0	0	0	0	0	0	313	0	0	down
ENSMUSG00000072235.5	Tuba1a	15	98949841	98953551	-	3711	-1.27142	0.0395211	0.737857	2359.11	1285.85	2449.5	3185.21	1856.67	1462.97	7758	11322.9	3707	968	1807	3080	1444	1172	17996	10465	down
ENSMUSG00000072663.12	Spef2	15	9578193	9748868	-	170676	-2.25172	0.00533701	0.269345	132.37	9.29851	29.8224	23.7856	320.159	314.565	195.286	108.197	208	7	22	23	249	252	453	100	down
ENSMUSG00000072770.9	Acrbp	6	125049689	125063267	+	13579	-6.00209	0.0379119	0.73298	0	0	0	0	10.2862	0	8.62191	30.2953	0	0	0	0	8	0	20	28	down
ENSMUSG00000072923.6	Gm10439	X	149594570	149636764	+	42195	-2.77607	0.0429493	0.7519	14.6371	23.9104	0	0	127.292	41.193	43.1096	53.0168	23	18	0	0	99	33	100	49	down
ENSMUSG00000073062.3	Zxdb	X	94724569	94730187	+	5619	-1.26366	0.0278967	0.661388	197.919	42.5075	55.5781	158.226	178.723	284.606	341.428	289.969	311	32	41	153	139	228	792	268	down
ENSMUSG00000073073.4	Gm8098	11	30267464	30280491	+	13028	-6.29292	0.0208545	0.578444	0	0	0	0	18.0009	0	25.8657	16.2296	0	0	0	0	14	0	60	15	down
ENSMUSG00000073096.11	Lrrc61	6	48554796	48570722	+	15927	-1.02861	0.0249251	0.625566	120.278	61.1045	142.334	191.319	326.588	340.778	182.353	203.411	189	46	105	185	254	273	423	188	down
ENSMUSG00000073412.6	Lst1	17	35185095	35188439	-	3345	-8.22846	0.00681088	0.313717	0	0	0	0	66.8605	163.524	0	0	0	0	0	0	52	131	0	0	down
ENSMUSG00000073436.11	Eme2	17	24888486	24895087	-	6602	-1.4185	0.0144923	0.480083	161.008	106.269	126.067	47.5713	101.577	257.144	338.841	481.479	253	80	93	46	79	206	786	445	down
ENSMUSG00000073490.11	Ifi207	1	173723427	173741747	-	18321	-9.02518	0.00148012	0.114317	0	0	0	0	237.869	162.275	0	0	0	0	0	0	185	130	0	0	down
ENSMUSG00000073514.3	Dok6	18	89301082	89769528	-	468447	-6.71518	0.0474231	0.771747	0	0	0	0	0	0	34.0566	46.5249	0	0	0	0	0	0	79	43	down
ENSMUSG00000073538.10	E330020D12Rik	1	153404827	153414233	-	9407	-2.15775	0.00335584	0.200055	21.6374	10.6269	10.8445	21.7173	147.865	36.1999	35.3498	73.5743	34	8	8	21	115	29	82	68	down
ENSMUSG00000073594.3	Gm10545	18	37008868	37020679	-	11812	-4.92911	0.0387124	0.737115	0	5.31343	0	4.13663	0	269.627	15.9505	0	0	4	0	4	0	216	37	0	down
ENSMUSG00000073795.11	6430531B16Rik	7	139972303	139978755	-	6453	-6.37029	0.0374929	0.730958	0	0	0	0	1.28578	53.6757	0	8.6558	0	0	0	0	1	43	0	8	down
ENSMUSG00000073889.10	Il11ra1	4	41699989	41769474	+	69486	-4.02276	0.00521261	0.263543	0	43.8358	8.13338	0	64.289	71.1515	260.813	440.364	0	33	6	0	50	57	605	407	down
ENSMUSG00000073982.11	Rhog	7	102239123	102256054	-	16932	-2.86392	4.31214e-06	0.000696897	138.098	67.7463	29.8224	81.6985	291.872	232.179	871.244	924.007	217	51	22	79	227	186	2021	854	down
ENSMUSG00000073985.2	Gm10602	7	101836503	101842771	+	6269	-1.79426	0.0273166	0.654452	11.4551	9.29851	16.2668	31.0248	34.716	126.075	53.887	21.6395	18	7	12	30	27	101	125	20	down
ENSMUSG00000074141.13	Il4i1	7	44816387	44840809	+	24423	-4.24481	0.0152983	0.497354	0	5.31343	0	0	30.8587	31.2068	26.2968	6.49185	0	4	0	0	24	25	61	6	down
ENSMUSG00000074220.10	Zfp382	7	30121942	30134950	+	13009	-3.95305	0.0166286	0.518845	22.2738	0	0	0	120.863	18.7241	111.654	103.87	35	0	0	0	94	15	259	96	down
ENSMUSG00000074284.6	Gm10658	9	57056630	57071966	-	15337	-4.66221	0.00331345	0.199657	0	0	16.2668	0	39.8592	163.524	137.951	59.5086	0	0	12	0	31	131	320	55	down
ENSMUSG00000074377.12	Sult2a4	7	13909676	13989607	-	79932	-1.55868	0.0390746	0.737499	6.36394	30.5522	20.3334	34.1272	56.5743	114.841	66.8198	29.2133	10	23	15	33	44	92	155	27	down
ENSMUSG00000074576.4	Mocs3	2	168230622	168232594	+	1973	-5.26264	0.0164484	0.517302	0	0	0	4.13663	10.2862	0	58.629	90.8859	0	0	0	4	8	0	136	84	down
ENSMUSG00000074622.4	Mafb	2	160363703	160367065	-	3363	-8.02681	0.00141321	0.110368	0	0	0	0	46.288	149.793	0	4.3279	0	0	0	0	36	120	0	4	down
ENSMUSG00000074635.2	3110070M22Rik	13	119487261	119488383	-	1123	-1.50854	0.0180196	0.534263	89.0952	298.881	66.4226	44.4688	259.727	250.903	409.972	495.545	140	225	49	43	202	201	951	458	down
ENSMUSG00000074771.10	Ankef1	2	136501910	136562091	+	60182	-6.53428	0.0224289	0.59255	0	0	0	0	46.288	23.7172	1.29329	0	0	0	0	0	36	19	3	0	down
ENSMUSG00000074794.10	Arrdc3	13	80883384	80896042	+	12659	-2.08247	0.0293133	0.672588	514.206	156.746	150.468	609.119	342.017	54.924	1507.11	4156.95	808	118	111	589	266	44	3496	3842	down
ENSMUSG00000074829.10	2010315B03Rik	9	124291804	124312696	-	20893	-8.52421	0.000100303	0.0125756	0	0	0	0	29.5729	167.268	85.788	0	0	0	0	0	23	134	199	0	down
ENSMUSG00000074874.10	Ctla2b	13	60895350	60897447	-	2098	-6.46956	0.000660274	0.0602955	2.54558	5.31343	0	0	336.874	357.006	1.72438	0	4	4	0	0	262	286	4	0	down
ENSMUSG00000074909.4	Ranbp6	19	29808400	29812974	-	4575	-7.67767	0.000856906	0.0744044	0	0	0	0	46.288	0	79.3216	31.3773	0	0	0	0	36	0	184	29	down
ENSMUSG00000075014.1	Gm10800	2	98666547	98667301	-	755	-1.4798	0.0381086	0.734217	118.369	30.5522	79.9782	132.372	151.722	493.067	303.06	61.6726	186	23	59	128	118	395	703	57	down
ENSMUSG00000075070.6	4932412D23Rik	16	42725702	42875762	-	150061	-8.03426	0.000303791	0.032173	0	0	0	0	70.7179	0	35.3498	95.2138	0	0	0	0	55	0	82	88	down
ENSMUSG00000075284.10	Wipf1	2	73429610	73529734	-	100125	-7.63258	0.00226232	0.151206	0	0	0	0	46.288	102.358	3.87986	0	0	0	0	0	36	82	9	0	down
ENSMUSG00000075394.4	Hoxc4	15	103018934	103036852	+	17919	-20.7857	8.61561e-10	1.95841e-07	0	0	0	0	0	0	54.3181	0	0	0	0	0	0	0	126	0	down
ENSMUSG00000075706.10	Gpx4	10	80047166	80056439	+	9274	-1.41923	0.0349007	0.717737	2465.39	518.06	683.204	778.721	1126.34	902.501	4875.26	4987.9	3874	390	504	753	876	723	11309	4610	down
ENSMUSG00000076431.4	Sox4	13	28948919	28953713	-	4795	-1.83026	0.0400888	0.7394	332.834	108.925	93.5339	77.5619	451.308	23.7172	443.597	1263.75	523	82	69	75	351	19	1029	1168	down
ENSMUSG00000076437.10	Selenoh	2	84669215	84670770	-	1556	-1.07795	0.0464346	0.768204	269.831	260.358	235.868	471.576	509.169	229.682	531.541	1342.73	424	196	174	456	396	184	1233	1241	down
ENSMUSG00000076928.5	Trac	14	54220521	54224206	+	3686	-8.56709	0.00341343	0.200918	0	0	0	0	0	0	261.675	29.2133	0	0	0	0	0	0	607	27	down
ENSMUSG00000077563.1	Snora68	8	70895759	70895889	-	131	-4.7593	0.0137507	0.462644	0	0	0	1.03416	5.14312	7.48963	8.62191	12.9837	0	0	0	1	4	6	20	12	down
ENSMUSG00000078289.2	Gm10923	15	85116870	85117287	+	418	-5.36748	0.045159	0.76291	0.636394	0	0	0	36.0018	1.24827	0	15.1476	1	0	0	0	28	1	0	14	down
ENSMUSG00000078537.3	B020031M17Rik	13	119949357	119950806	-	1450	-6.3151	0.0233959	0.603438	0	0	0	0	6.4289	27.462	27.159	0	0	0	0	0	5	22	63	0	down
ENSMUSG00000078771.10	Evi2a	11	79526560	79530609	-	4050	-4.14038	0.0374608	0.730958	3.81837	0	0	16.5465	172.294	187.241	2.15548	0	6	0	0	16	134	150	5	0	down
ENSMUSG00000078810.4	Gp6	7	4363965	4397744	-	33780	-6.65848	0.0132954	0.456812	0	0	0	0	0	38.6964	4.31096	34.6232	0	0	0	0	0	31	10	32	down
ENSMUSG00000078920.3	Ifi47	11	49076587	49096974	+	20388	-7.76015	0.001621	0.122161	0	0	0	0	46.288	107.351	0	12.9837	0	0	0	0	36	86	0	12	down
ENSMUSG00000078998.3	Bpifa6	2	153974945	154000495	+	25551	-4.11586	0.0221464	0.590757	0	0	0	12.4099	36.0018	9.98618	19.8304	150.395	0	0	0	12	28	8	46	139	down
ENSMUSG00000079018.10	Ly6c1	15	75044018	75048830	-	4813	-6.70205	0.0478606	0.771747	0	0	0	0	0	23.7172	0	56.2627	0	0	0	0	0	19	0	52	down
ENSMUSG00000079262.3	Slco1a6	6	142085761	142208521	-	122761	-7.36942	0.00184206	0.133883	0	0	0	0	0	27.462	47.4205	51.9348	0	0	0	0	0	22	110	48	down
ENSMUSG00000079293.11	Clec7a	6	129461591	129472779	-	11189	-7.20957	0.0283286	0.666176	0	0	0	0	0	54.924	58.629	0	0	0	0	0	0	44	136	0	down
ENSMUSG00000079387.10	Luzp4	X	148857640	148924139	+	66500	-7.17475	0.0295206	0.673293	0	0	0	0	0	0	40.523	70.3284	0	0	0	0	0	0	94	65	down
ENSMUSG00000079419.4	Ms4a6c	19	11469366	11482192	+	12827	-5.80657	0.00986561	0.388497	0	0	6.77782	5.17079	267.442	395.702	0	0	0	0	5	5	208	317	0	0	down
ENSMUSG00000079429.9	Mroh2a	1	88226986	88262289	+	35304	-2.07218	0.0280023	0.662721	25.4558	49.1492	0	32.0589	81.0041	142.303	115.103	110.361	40	37	0	31	63	114	267	102	down
ENSMUSG00000079442.12	St6galnac4	2	32587095	32599698	+	12604	-9.70297	9.77248e-14	2.63209e-10	0	0	0	0	82.2899	325.799	103.463	128.755	0	0	0	0	64	261	240	119	down
ENSMUSG00000079478.8	Sssca1	19	5728088	5731732	-	3645	-1.36201	0.0021961	0.14867	301.014	316.149	294.157	437.449	531.027	394.454	1216.12	1323.26	473	238	217	423	413	316	2821	1223	down
ENSMUSG00000079480.3	Pin4	X	102119447	102127669	+	8223	-1.19257	0.03961	0.737857	347.471	158.075	189.779	190.285	347.16	131.069	793.647	753.055	546	119	140	184	270	105	1841	696	down
ENSMUSG00000079484.12	Phyhd1	2	30266203	30282149	+	15947	-7.60866	0.0182083	0.537944	0	0	0	0	91.2903	58.6688	0	0	0	0	0	0	71	47	0	0	down
ENSMUSG00000079554.2	Aox2	1	58278326	58380259	+	101934	-7.4676	0.0193147	0.560186	0	0	0	0	69.4321	0	66.3887	0	0	0	0	0	54	0	154	0	down
ENSMUSG00000079657.10	Rab26	17	24527241	24534210	-	6970	-6.03644	0.040651	0.740452	0	0	1.35556	0	0	0	65.5265	17.3116	0	0	1	0	0	0	152	16	down
ENSMUSG00000080058.2	Gm11175	8	70699162	70700080	-	919	-2.77639	0.00119091	0.0967923	416.202	221.836	302.291	158.226	216.011	212.206	2177.03	4922.99	654	167	223	153	168	170	5050	4550	down
ENSMUSG00000081194.1	Gm8424	X	150924620	150926159	-	1540	-6.66172	0.0492255	0.781987	0	0	0	0	33.4303	0	0	44.361	0	0	0	0	26	0	0	41	down
ENSMUSG00000081604.5	Gm11518	11	94037218	94037628	-	411	-1.36628	0.0238364	0.609736	73.8217	41.1791	25.7557	29.9906	74.5752	58.6688	141.399	167.706	116	31	19	29	58	47	328	155	down
ENSMUSG00000081669.1	Npm3-ps1	6	85076192	85076719	+	528	-2.06453	0.0165105	0.517509	6.36394	5.31343	6.77782	5.17079	15.4293	43.6895	28.8834	10.8197	10	4	5	5	12	35	67	10	down
ENSMUSG00000081672.1	Gm13000	4	135853678	135854173	+	496	-6.24967	0.0343162	0.712285	0	0	0	0	0	14.9793	1.29329	42.197	0	0	0	0	0	12	3	39	down
ENSMUSG00000082101.3	Slfn14	11	83275110	83286726	-	11617	-23.7073	9.1507e-18	1.27922e-13	0	0	0	0	0	0	63.3711	403.577	0	0	0	0	0	0	147	373	down
ENSMUSG00000082838.1	Gm14519	X	15365179	15365490	+	312	-1.45727	0.0217398	0.587927	11.4551	11.9552	27.1113	13.4441	61.7174	41.193	40.9541	30.2953	18	9	20	13	48	33	95	28	down
ENSMUSG00000083485.1	Gm12308	11	69630924	69631312	-	389	-6.31117	0.000875496	0.0755407	0	0	0	0	11.572	22.4689	10.7774	16.2296	0	0	0	0	9	18	25	15	down
ENSMUSG00000083678.3	Gm12989	4	135715868	135716598	-	731	-1.11336	0.044532	0.761181	55.3663	34.5373	27.1113	52.7421	90.0045	41.193	120.276	116.853	87	26	20	51	70	33	279	108	down
ENSMUSG00000083716.4	Gm13436	2	36807826	36808392	-	567	-1.54662	0.0486034	0.776959	44.5476	6.64179	14.9112	16.5465	54.0027	27.462	77.5972	85.476	70	5	11	16	42	22	180	79	down
ENSMUSG00000084990.1	Gm14549	X	36814771	36817200	+	2430	-7.52965	0.0178219	0.533144	0	0	0	0	0	0	35.7809	106.034	0	0	0	0	0	0	83	98	down
ENSMUSG00000085241.7	Snhg3	4	132348014	132353686	-	5673	-2.43327	0.00242236	0.158983	50.2751	17.2687	20.3334	10.3416	133.721	23.7172	212.53	164.46	79	13	15	10	104	19	493	152	down
ENSMUSG00000085271.7	E130006D01Rik	5	111734284	111761725	-	27442	-21.128	4.47556e-10	1.36013e-07	0	0	0	0	0	0	69.8375	0	0	0	0	0	0	0	162	0	down
ENSMUSG00000085541.1	Gm16010	9	97015966	97022043	+	6078	-7.82645	0.000645412	0.0593588	0	0	0	0	25.7156	0	99.5831	48.6889	0	0	0	0	20	0	231	45	down
ENSMUSG00000085587.1	Gm14493	X	10717473	10718710	-	1238	-3.85847	0.00118997	0.0967923	63.003	6.64179	20.3334	28.9564	61.7174	17.4758	72.4241	1581.85	99	5	15	28	48	14	168	1462	down
ENSMUSG00000085633.1	Bloc1s6os	2	122733290	122738362	-	5073	-7.05649	0.0055296	0.274604	0	0	0	0	0	71.1515	20.2615	10.8197	0	0	0	0	0	57	47	10	down
ENSMUSG00000085785.7	Sox5os3	6	144672868	144693834	+	20967	-6.84531	0.0432677	0.753678	0	0	0	0	78.4325	0	9.9152	0	0	0	0	0	61	0	23	0	down
ENSMUSG00000085889.1	1700054M17Rik	2	118304914	118308166	+	3253	-6.28175	0.0306548	0.679091	0	0	0	0	48.8596	6.24136	4.74205	0	0	0	0	0	38	5	11	0	down
ENSMUSG00000086049.1	Gm12735	11	3193516	3194263	-	748	-3.24593	0.00614174	0.294897	3.81837	3.98507	0	12.4099	61.7174	46.1861	6.03534	80.0661	6	3	0	12	48	37	14	74	down
ENSMUSG00000086370.8	Ftx	X	103560907	103623754	-	62848	-5.5521	0.0396863	0.737857	0	0	0	4.13663	0	0	96.5654	98.4597	0	0	0	4	0	0	224	91	down
ENSMUSG00000086502.1	B130055M24Rik	7	127448636	127460360	+	11725	-7.20472	0.00303377	0.188947	0	0	0	0	0	28.7103	22.8481	61.6726	0	0	0	0	0	23	53	57	down
ENSMUSG00000086503.3	Xist	X	103460375	103483217	-	22843	-2.17057	0.0308905	0.679911	186.463	10.6269	43.378	4.13663	484.739	253.399	269.004	99.5417	293	8	32	4	377	203	624	92	down
ENSMUSG00000086704.1	Gm14582	X	52296181	52333679	+	37499	-6.71437	0.04745	0.771747	0	0	0	0	65.5747	0	15.0883	0	0	0	0	0	51	0	35	0	down
ENSMUSG00000086779.1	Gm13562	2	26352645	26371952	+	19308	-6.84592	0.0432489	0.753678	0	0	0	0	74.5752	0	13.7951	0	0	0	0	0	58	0	32	0	down
ENSMUSG00000087006.3	Gm13889	2	93955810	93957201	-	1392	-4.41916	0.0205479	0.575375	40.7292	0	0	2.06832	30.8587	0	609.138	285.641	64	0	0	2	24	0	1413	264	down
ENSMUSG00000087132.7	A930001C03Rik	19	4439003	4448332	+	9330	-7.34129	0.00374218	0.213526	0	0	0	0	9.00045	0	15.9505	99.5417	0	0	0	0	7	0	37	92	down
ENSMUSG00000087178.7	A230056P14Rik	7	55962531	55980868	+	18338	-1.78567	0.00297101	0.18649	25.4558	22.5821	21.689	21.7173	57.8601	41.193	146.573	68.1644	40	17	16	21	45	33	340	63	down
ENSMUSG00000087365.7	C430049B03Rik	X	53055046	53057190	-	2145	-9.78533	0.00264771	0.170964	0	0	0	0	27.0014	42.4412	0	608.07	0	0	0	0	21	34	0	562	down
ENSMUSG00000087466.3	A330041J22Rik	9	86695460	86701253	+	5794	-7.3643	0.0255324	0.634544	0	0	0	0	68.1463	0	0	58.4266	0	0	0	0	53	0	0	54	down
ENSMUSG00000087485.1	Gm13383	2	6255946	6257266	-	1321	-2.97998	0.0290356	0.671488	3.81837	0	0	4.13663	16.7151	11.2344	16.8127	21.6395	6	0	0	4	13	9	39	20	down
ENSMUSG00000087497.7	2810001G20Rik	11	64079484	64083259	+	3776	-1.11116	0.0127618	0.446556	119.642	89	93.5339	81.6985	259.727	314.565	123.293	135.247	188	67	69	79	202	252	286	125	down
ENSMUSG00000087590.2	Epb41l4aos	18	33794892	33795986	+	1095	-2.60838	0.0139097	0.46579	7.63673	14.6119	12.2001	0	15.4293	69.9032	65.0954	57.3447	12	11	9	0	12	56	151	53	down
ENSMUSG00000089661.9	Mia	7	27179742	27181157	-	1416	-6.80541	0.00966181	0.385906	0	0	0	0	0	57.4205	6.89753	21.6395	0	0	0	0	0	46	16	20	down
ENSMUSG00000089665.2	Fcor	8	3671188	3672362	-	1175	-7.04836	0.0350672	0.71834	0	0	0	0	0	0	45.265	56.2627	0	0	0	0	0	0	105	52	down
ENSMUSG00000089694.2	Nat8f7	6	85706727	85713205	-	6479	-1.14888	0.0430871	0.753392	33.7289	38.5224	24.4001	51.7079	93.8619	61.1653	129.76	43.279	53	29	18	50	73	49	301	40	down
ENSMUSG00000089766.1	Gm16538	19	5727206	5731627	+	4422	-3.79616	0.0333813	0.707014	0	0	0	5.17079	19.2867	19.9724	7.32863	25.9674	0	0	0	5	15	16	17	24	down
ENSMUSG00000089901.1	Gm8113	14	43925390	43933411	+	8022	-5.33518	0.0479587	0.771951	0	0	0	8.27327	0	0	24.5725	310.527	0	0	0	8	0	0	57	287	down
ENSMUSG00000089929.1	Bcl2a1b	9	89199209	89207827	+	8619	-7.97747	4.16057e-06	0.000676311	0.636394	1.32836	0	1.03416	284.157	470.598	1.29329	1.08197	1	1	0	1	221	377	3	1	down
ENSMUSG00000089996.6	Tmsb15b2	X	136955265	136975497	-	20233	-2.38179	0.00574066	0.282159	248.194	112.91	28.4668	52.7421	194.153	89.8756	1166.11	859.088	390	85	21	51	151	72	2705	794	down
ENSMUSG00000089997.1	1810020O05Rik	6	87675593	87690847	-	15255	-6.66726	0.0165698	0.518204	0	0	0	0	0	58.6688	2.15548	17.3116	0	0	0	0	0	47	5	16	down
ENSMUSG00000090066.2	1110002E22Rik	3	138065052	138081506	+	16455	-6.60698	0.0138664	0.465416	0	0	0	0	6.4289	0	42.2474	25.9674	0	0	0	0	5	0	98	24	down
ENSMUSG00000090077.9	Lime1	2	181380078	181383628	+	3551	-7.45126	0.0217431	0.587927	0	0	0	0	0	0	116.827	17.3116	0	0	0	0	0	0	271	16	down
ENSMUSG00000090089.3	Magea9-ps	X	72869367	72870265	+	899	-8.55584	1.67457e-06	0.000280356	0	0	0	0	64.289	204.717	11.6396	8.6558	0	0	0	0	50	164	27	8	down
ENSMUSG00000090137.8	Uba52	8	70508263	70510801	-	2539	-1.00774	0.0213715	0.584854	3048.96	1239.36	1526.36	1874.93	2557.41	1926.08	4986.91	5994.14	4791	933	1126	1813	1989	1543	11568	5540	down
ENSMUSG00000090213.1	Tmem189	2	167642608	167689822	-	47215	-1.24547	0.00606479	0.293366	817.13	862.104	1081.74	653.588	1180.35	837.59	3287.54	2786.09	1284	649	798	632	918	671	7626	2575	down
ENSMUSG00000090291.2	Lrrc10b	19	10455371	10457447	-	2077	-5.68616	0.0404541	0.740452	2.54558	0	0	0	0	0	30.6078	111.443	4	0	0	0	0	0	71	103	down
ENSMUSG00000090460.3	Gm17511	7	127286044	127286385	-	342	-3.09281	0.00856247	0.359997	2.54558	0	2.71113	5.17079	34.716	27.462	6.03534	22.7215	4	0	2	5	27	22	14	21	down
ENSMUSG00000090861.1	Arf4os	14	26628407	26638183	-	9777	-6.73627	0.000137052	0.0165165	0	0	0	0	11.572	17.4758	22.417	30.2953	0	0	0	0	9	14	52	28	down
ENSMUSG00000090990.1	Gm17197	19	56364262	56366241	+	1980	-2.84067	0.0470321	0.771027	0	33.2089	0	9.30743	64.289	117.338	38.3675	82.2301	0	25	0	9	50	94	89	76	down
ENSMUSG00000091049.8	Gm1979	5	25999022	26004798	-	5777	-22.1683	5.80795e-11	4.13432e-08	0	0	0	0	0	0	0	170.952	0	0	0	0	0	0	0	158	down
ENSMUSG00000091228.1	Gm20390	11	93949819	93968293	-	18475	-9.00156	1.32428e-05	0.00204561	0	0	0	0	0	225.937	89.6679	77.9022	0	0	0	0	0	181	208	72	down
ENSMUSG00000091478.2	Gm10039	11	100361716	100362126	-	411	-1.46107	0.0449875	0.76291	64.2758	13.2836	13.5556	24.8198	78.4325	43.6895	119.413	81.1481	101	10	10	24	61	35	277	75	down
ENSMUSG00000091639.2	Gm3756	9	31935446	31936800	-	1355	-1.66005	0.0416432	0.74398	32.4561	18.597	40.6669	50.6738	33.4303	31.2068	123.293	261.838	51	14	30	49	26	25	286	242	down
ENSMUSG00000092190.1	Gm20470	10	7743520	7761099	-	17580	-22.1004	6.66995e-11	4.47136e-08	0	0	0	0	144.007	0	0	0	0	0	0	0	112	0	0	0	down
ENSMUSG00000092417.3	Gpank1	17	35121455	35124814	+	3360	-1.19988	0.000895003	0.0765241	245.648	235.119	352.446	237.856	405.02	987.383	557.407	509.61	386	177	260	230	315	791	1293	471	down
ENSMUSG00000093460.9	Six3os1	17	85600651	85618398	-	17748	-6.20138	0.0370664	0.730782	0	0	0	0	1.28578	0	30.1767	24.8854	0	0	0	0	1	0	70	23	down
ENSMUSG00000093867.7	Gsdmcl2	15	63880707	63890512	+	9806	-2.69724	0.011919	0.431389	9.54591	3.98507	8.13338	0	18.0009	56.1722	40.523	27.0494	15	3	6	0	14	45	94	25	down
ENSMUSG00000093979.8	Gm2237	14	19563800	19585135	-	21336	-20.8185	8.09399e-10	1.87025e-07	0	0	0	0	0	0	55.6113	0	0	0	0	0	0	0	129	0	down
ENSMUSG00000094504.3	Gm5294	5	138820080	138821619	+	1540	-7.74283	0.0121297	0.437028	0	0	0	0	0	0	98.2898	66.0005	0	0	0	0	0	0	228	61	down
ENSMUSG00000094786.1	Gm14403	2	177498215	177509763	+	11549	-5.97176	0.0452414	0.76291	0	0	0	0	0	2.49654	20.6926	24.8854	0	0	0	0	0	2	48	23	down
ENSMUSG00000094910.1	D430019H16Rik	12	105453856	105493095	+	39240	-7.38375	0.0216315	0.587927	0	0	0	0	0	0	46.9894	81.1481	0	0	0	0	0	0	109	75	down
ENSMUSG00000095369.1	Gm21859	16	10912012	10914797	-	2786	-7.2418	0.00634325	0.299881	0	0	0	0	0	67.4067	1.29329	47.6069	0	0	0	0	0	54	3	44	down
ENSMUSG00000095609.2	Gm21188	13	120034605	120052194	-	17590	-9.2373	0.000163184	0.0190103	0	0	0	0	128.578	334.537	0.431096	0	0	0	0	0	100	268	1	0	down
ENSMUSG00000095771.2	Igkv14-111	6	68256389	68256869	+	481	-5.95355	0.0392319	0.737857	0	0	0	0	21.8582	14.9793	10.7774	0	0	0	0	0	17	12	25	0	down
ENSMUSG00000096045.7	Gm21698	5	25982030	25988650	-	6621	-21.4065	2.61258e-10	1.12377e-07	0	0	0	0	0	0	0	85.476	0	0	0	0	0	0	0	79	down
ENSMUSG00000096051.1	Vmn1r40	6	89714203	89715135	+	933	-5.91739	0.0409044	0.740452	0	0	0	0	14.1436	14.9793	17.2438	0	0	0	0	0	11	12	40	0	down
ENSMUSG00000096255.1	Dynlt1b	17	6430112	6436293	+	6182	-1.20755	0.0341496	0.710527	2838.32	1118.48	661.515	1057.94	1278.06	1903.61	5802.12	4127.73	4460	842	488	1023	994	1525	13459	3815	down
ENSMUSG00000096351.2	Samd11	4	156246966	156255657	-	8692	-2.31715	0.00874039	0.361984	44.5476	17.2687	5.42225	39.298	180.009	21.2206	238.827	94.1318	70	13	4	38	140	17	554	87	down
ENSMUSG00000096606.2	Tpbgl	7	99624082	99627103	-	3022	-6.92274	0.0409446	0.740452	0	0	0	0	66.8605	0	26.2968	0	0	0	0	0	52	0	61	0	down
ENSMUSG00000096976.1	Gm26882	9	90094178	90095902	+	1725	-9.03124	0.00103188	0.0861206	0	0	0	0	0	0	192.7	208.821	0	0	0	0	0	0	447	193	down
ENSMUSG00000096991.1	Gm26789	10	63292286	63295793	-	3508	-7.50247	0.0178293	0.533144	0	0	0	0	0	0	65.5265	73.5743	0	0	0	0	0	0	152	68	down
ENSMUSG00000097028.2	Ptgs2os	1	150074873	150099963	-	25091	-7.18169	0.0339308	0.708491	0	0	0	0	0	0	109.067	2.16395	0	0	0	0	0	0	253	2	down
ENSMUSG00000097055.1	Gm4419	12	21417911	21419803	+	1893	-21.1396	4.37714e-10	1.35083e-07	0	0	0	0	0	0	70.2686	0	0	0	0	0	0	0	163	0	down
ENSMUSG00000097057.1	Gm17638	15	77961674	77967126	+	5453	-6.5809	0.0170555	0.525749	0	0	0	0	0	37.4482	2.58657	33.5412	0	0	0	0	0	30	6	31	down
ENSMUSG00000097065.1	A630075F10Rik	2	170061240	170070671	-	9432	-21.5669	1.91157e-10	8.90759e-08	0	0	0	0	0	96.1169	0	0	0	0	0	0	0	77	0	0	down
ENSMUSG00000097075.3	D830044I16Rik	7	126971722	126976098	-	4377	-7.51363	0.00223838	0.151166	0	0	0	0	0	7.48963	37.5053	95.2138	0	0	0	0	0	6	87	88	down
ENSMUSG00000097080.7	1700086O06Rik	18	38238405	38250565	-	12161	-1.98175	9.65032e-05	0.0122642	38.1837	21.2537	12.2001	32.0589	93.8619	121.082	103.463	97.3777	60	16	9	31	73	97	240	90	down
ENSMUSG00000097204.2	Gm17690	3	96167464	96172416	-	4953	-1.07025	0.0385642	0.737115	42.002	77.0448	48.8003	65.152	52.7169	148.544	168.558	116.853	66	58	36	63	41	119	391	108	down
ENSMUSG00000097296.1	Gm26532	8	84208920	84209609	+	690	-4.52132	0.0010921	0.0906054	1.27279	0	10.8445	0	16.7151	63.6619	39.6608	149.313	2	0	8	0	13	51	92	138	down
ENSMUSG00000097305.1	Gm17276	17	32113429	32141839	+	28411	-6.73098	0.0469015	0.770005	0	0	0	0	0	0	2.58657	78.9842	0	0	0	0	0	0	6	73	down
ENSMUSG00000097317.1	Gm17281	2	91250743	91255995	-	5253	-3.93829	0.0313272	0.682968	0	5.31343	0	0	30.8587	12.4827	27.159	6.49185	0	4	0	0	24	10	63	6	down
ENSMUSG00000097354.7	2310001H17Rik	6	129208412	129238725	-	30314	-21.295	3.24344e-10	1.18843e-07	0	0	0	0	0	78.6411	0	0	0	0	0	0	0	63	0	0	down
ENSMUSG00000097379.1	Gm26873	17	17389943	17395303	-	5361	-4.89641	0.0375341	0.730958	0	0	2.71113	0	24.4298	17.4758	29.7456	0	0	0	2	0	19	14	69	0	down
ENSMUSG00000097392.2	D930016D06Rik	5	104525735	104554207	+	28473	-1.14112	0.0416213	0.74398	153.371	115.567	62.3559	48.6054	183.866	187.241	111.654	358.134	241	87	46	47	143	150	259	331	down
ENSMUSG00000097428.1	AW047730	3	88200623	88203481	+	2859	-6.33074	0.0193853	0.561069	0	0	0	0	27.0014	0	18.5371	16.2296	0	0	0	0	21	0	43	15	down
ENSMUSG00000097468.1	Mdrl	X	36814771	36817185	-	2415	-6.81922	0.0440752	0.756475	0	0	0	0	0	0	55.1802	31.3773	0	0	0	0	0	0	128	29	down
ENSMUSG00000097518.1	Gm26694	17	25794894	25964784	+	169891	-7.1156	0.00752597	0.333468	0	0	0	0	9.00045	17.4758	0	80.0661	0	0	0	0	7	14	0	74	down
ENSMUSG00000097583.2	6430590A07Rik	3	40885897	40894193	-	8297	-5.62965	0.00907036	0.369676	0	0	2.71113	0	99.005	1.24827	1.29329	16.2296	0	0	2	0	77	1	3	15	down
ENSMUSG00000097601.2	Gm26660	14	25315873	25379609	-	63737	-7.30362	0.00362412	0.209276	0	0	0	0	47.5738	67.4067	6.46643	0	0	0	0	0	37	54	15	0	down
ENSMUSG00000097613.1	Gm17597	15	81800791	81802613	-	1823	-21.3083	3.16051e-10	1.18843e-07	0	0	0	0	79.7183	0	0	0	0	0	0	0	62	0	0	0	down
ENSMUSG00000097626.5	4921504A21Rik	5	19202368	19226555	-	24188	-6.32018	0.0211085	0.581521	0	0	0	0	10.2862	0	18.5371	32.4592	0	0	0	0	8	0	43	30	down
ENSMUSG00000097637.1	4933417D19Rik	8	123235091	123242359	+	7269	-6.10711	0.0462544	0.767406	0	0	0	0	42.4307	0	0.862191	9.73777	0	0	0	0	33	0	2	9	down
ENSMUSG00000097731.1	2700016F22Rik	4	139376549	139380379	-	3831	-3.82413	0.00384256	0.217454	36.9109	0	0	7.23911	117.006	56.1722	137.951	326.756	58	0	0	7	91	45	320	302	down
ENSMUSG00000097732.2	D930048G16Rik	17	23790532	23794241	+	3710	-4.25005	0.0151551	0.493848	3.81837	1.32836	0	1.03416	63.0032	0	5.17315	55.1807	6	1	0	1	49	0	12	51	down
ENSMUSG00000097792.1	Gm27042	19	40589435	40594862	+	5428	-7.65035	0.0173569	0.532106	0	0	0	0	0	0	10.3463	143.903	0	0	0	0	0	0	24	133	down
ENSMUSG00000097800.1	B230344G16Rik	11	115988052	115993715	-	5664	-21.1204	4.54164e-10	1.36537e-07	0	0	0	0	0	0	69.4064	0	0	0	0	0	0	0	161	0	down
ENSMUSG00000097987.1	Gm17786	8	121581765	121582191	+	427	-1.96958	0.0196	0.564372	8.90952	3.98507	4.06669	15.5124	16.7151	47.4343	25.0035	40.0331	14	3	3	15	13	38	58	37	down
ENSMUSG00000098068.1	Gm7909	10	31574400	31575013	-	614	-4.83955	0.0318418	0.689882	0.636394	0	0	0	1.28578	1.24827	17.2438	16.2296	1	0	0	0	1	1	40	15	down
ENSMUSG00000098109.1	9530085P06Rik	8	121856777	121857603	-	827	-6.15395	0.0038265	0.217454	0	0	0	0	12.8578	11.2344	2.58657	28.1313	0	0	0	0	10	9	6	26	down
ENSMUSG00000098641.1	Rnu3b4	11	87462286	87462500	+	215	-21.2031	3.87336e-10	1.28923e-07	0	0	0	0	0	0	0	73.5743	0	0	0	0	0	0	0	68	down
ENSMUSG00000099178.1	Gm8669	6	7194272	7195216	+	945	-5.01719	0.0337324	0.708491	0.636394	0	0	0	1.28578	36.1999	2.58657	1.08197	1	0	0	0	1	29	6	1	down
ENSMUSG00000099398.1	Ms4a14	19	11301249	11314454	-	13206	-6.92145	0.0409825	0.740452	0	0	0	0	27.0014	66.1584	0	0	0	0	0	0	21	53	0	0	down
ENSMUSG00000099974.1	Bcl2a1d	9	88723285	88731914	-	8630	-7.55465	0.0034107	0.200918	0	0	0	0	115.72	26.2137	2.58657	0	0	0	0	0	90	21	6	0	down
ENSMUSG00000100291.6	2310069B03Rik	6	82877864	82881853	-	3990	-21.345	2.94296e-10	1.18843e-07	0	0	0	0	0	0	81.9082	0	0	0	0	0	0	0	190	0	down
ENSMUSG00000100798.1	Gm19589	1	88551517	88562167	+	10651	-21.0598	5.06931e-10	1.4109e-07	0	0	0	0	0	0	75.4417	0	0	0	0	0	0	0	175	0	down
ENSMUSG00000100801.1	Gm15459	5	5781615	5783555	-	1941	-1.05499	0.0289594	0.671488	1218.06	468.91	645.248	930.743	986.193	777.673	2504.67	2512.35	1914	353	476	900	767	623	5810	2322	down
ENSMUSG00000100826.6	Snhg14	7	59307924	59975759	-	667836	-1.14399	0.0080541	0.348851	217.647	136.821	145.045	112.723	173.58	284.606	406.954	489.053	342	103	107	109	135	228	944	452	down
ENSMUSG00000101133.1	Gm29050	17	5388763	5419652	+	30890	-7.28223	0.0314997	0.684837	0	0	0	0	0	114.841	4.74205	0	0	0	0	0	0	92	11	0	down
ENSMUSG00000101360.2	4933417O13Rik	7	143322773	143364625	-	41853	-7.37038	6.08329e-06	0.000977487	0	0	0	0	41.1449	44.9378	12.0707	29.2133	0	0	0	0	32	36	28	27	down
ENSMUSG00000101389.1	Ms4a4a	19	11375523	11392790	+	17268	-24.1957	8.65454e-13	1.20986e-09	0	0	0	0	43.7165	622.888	0	0	0	0	0	0	34	499	0	0	down
ENSMUSG00000102037.1	Bcl2a1a	9	88956900	88962419	+	5520	-7.54303	0.0216789	0.587927	0	0	0	0	119.577	23.7172	0	0	0	0	0	0	93	19	0	0	down
ENSMUSG00000102059.1	Gm20257	1	58652641	58655831	+	3191	-4.55648	0.011922	0.431389	0.636394	1.32836	1.35556	1.03416	1.28578	82.3859	16.8127	0	1	1	1	1	1	66	39	0	down
ENSMUSG00000102258.1	Gm38257	2	15056713	15059473	+	2761	-21.0731	4.96612e-10	1.4109e-07	0	0	0	0	0	0	0	69.2464	0	0	0	0	0	0	0	64	down
ENSMUSG00000102353.1	Gm38345	19	37432909	37434656	-	1748	-1.74665	0.0351684	0.71834	7.63673	19.9254	28.4668	5.17079	21.8582	46.1861	45.6961	88.7219	12	15	21	5	17	37	106	82	down
ENSMUSG00000102399.1	Gm5049	1	161746056	161747645	+	1590	-2.02288	0.0431961	0.753678	20.3646	9.29851	24.4001	27.9223	128.578	166.02	35.3498	4.3279	32	7	18	27	100	133	82	4	down
ENSMUSG00000102594.1	Gm38381	1	168348534	168350808	-	2275	-6.70801	0.0476616	0.771747	0	0	0	0	57.8601	0	22.417	0	0	0	0	0	45	0	52	0	down
ENSMUSG00000103094.1	Gm37558	3	69119742	69122724	-	2983	-6.46915	0.0157968	0.506183	0	0	0	0	16.7151	0	37.0742	14.0657	0	0	0	0	13	0	86	13	down
ENSMUSG00000103183.1	Gm37090	4	156018556	156022660	-	4105	-7.01561	0.000201813	0.0228441	0	0	0	0	9.00045	6.24136	42.6785	41.115	0	0	0	0	7	5	99	38	down
ENSMUSG00000103380.1	Gm37756	1	172089910	172092679	-	2770	-6.96666	0.0396747	0.737857	0	0	0	0	0	0	22.417	73.5743	0	0	0	0	0	0	52	68	down
ENSMUSG00000103432.1	6720464F23Rik	1	160608955	160612450	-	3496	-4.96701	0.0210352	0.581521	4.45476	0	0	0	42.4307	0	90.5301	17.3116	7	0	0	0	33	0	210	16	down
ENSMUSG00000103677.1	Pcdhga4	18	37685210	37841873	+	156664	-22.2493	4.95552e-11	3.95861e-08	0	0	0	0	0	0	158.643	0	0	0	0	0	0	0	368	0	down
ENSMUSG00000103808.1	Gm37060	1	157404325	157406721	-	2397	-6.66149	0.0196003	0.564372	0	0	0	0	5.14312	3.74482	68.5442	0	0	0	0	0	4	3	159	0	down
ENSMUSG00000103851.1	Gm37606	16	77561650	77564765	+	3116	-5.89885	0.00982924	0.388218	0	0	0	0	3.85734	4.99309	5.60424	31.3773	0	0	0	0	3	4	13	29	down
ENSMUSG00000104030.1	5330406M23Rik	6	31108827	31110920	-	2094	-7.32996	0.00255655	0.165844	0	0	0	0	19.2867	0	26.2968	77.9022	0	0	0	0	15	0	61	72	down
ENSMUSG00000104140.1	Gm37140	1	97878382	97880065	-	1684	-6.96422	0.0397444	0.737857	0	0	0	0	0	67.4067	28.4523	0	0	0	0	0	0	54	66	0	down
ENSMUSG00000104351.1	Gm37125	1	172513249	172514807	+	1559	-6.67166	0.0488861	0.779361	0	0	0	0	0	0	67.2509	10.8197	0	0	0	0	0	0	156	10	down
ENSMUSG00000104369.1	Gm38082	5	136529596	136536477	-	6882	-21.2649	3.43798e-10	1.23234e-07	0	0	0	0	0	0	0	76.8202	0	0	0	0	0	0	0	71	down
ENSMUSG00000104411.1	Gm30340	3	17328694	17334425	-	5732	-2.59723	0.00511395	0.260879	19.0918	33.2089	0	25.854	96.4334	107.351	195.717	73.5743	30	25	0	25	75	86	454	68	down
ENSMUSG00000104501.1	Gm37736	6	72749113	72751914	-	2802	-5.12685	0.000365795	0.0378788	3.18197	1.32836	0	0	37.2876	52.4274	3.87986	78.9842	5	1	0	0	29	42	9	73	down
ENSMUSG00000104503.1	Gm37738	1	84819968	84824683	-	4716	-3.16566	0.0311727	0.681437	7.63673	23.9104	40.6669	21.7173	7.71467	4.99309	2.58657	825.547	12	18	30	21	6	4	6	763	down
ENSMUSG00000104576.1	F830115B05Rik	5	113117571	113119464	-	1894	-4.12535	0.0284988	0.669016	2.54558	0	2.71113	0	0	42.4412	16.3816	34.6232	4	0	2	0	0	34	38	32	down
ENSMUSG00000104588.1	Gm43666	3	33703355	33759616	-	56262	-1.14944	0.0408978	0.740452	59.1847	37.194	103.023	100.313	115.72	304.578	105.618	139.575	93	28	76	97	90	244	245	129	down
ENSMUSG00000104724.1	Gm43162	3	138976312	138978081	-	1770	-6.10237	0.0299045	0.67499	0	0	0	0	21.8582	0	10.3463	20.5575	0	0	0	0	17	0	24	19	down
ENSMUSG00000104871.1	Gm42639	5	57945042	57946912	+	1871	-7.40438	0.0221859	0.590757	0	0	0	0	0	0	103.894	25.9674	0	0	0	0	0	0	241	24	down
ENSMUSG00000105053.1	Gm43064	3	103809573	103838648	+	29076	-7.13846	0.0350247	0.71834	0	0	0	0	102.862	0	0	5.40987	0	0	0	0	80	0	0	5	down
ENSMUSG00000105071.1	Gm43336	5	113900395	113904898	-	4504	-6.08582	0.0435538	0.753678	0	0	0	0	3.85734	13.731	0	34.6232	0	0	0	0	3	11	0	32	down
ENSMUSG00000105126.1	Gm43723	3	138643756	138643944	-	189	-4.37991	0.0335539	0.708491	0.636394	0	0	0	5.14312	9.98618	6.89753	4.3279	1	0	0	0	4	8	16	4	down
ENSMUSG00000105145.1	AC157822.1	12	69361179	69361258	-	80	-9.00358	5.25506e-05	0.00716713	0.636394	1.32836	1.35556	1.03416	1.28578	1.24827	0.431096	2200.74	1	1	1	1	1	1	1	2034	down
ENSMUSG00000105510.1	Gm43815	5	72554240	72555229	-	990	-6.86821	0.0425694	0.749967	0	0	0	0	39.8592	49.9309	0	0	0	0	0	0	31	40	0	0	down
ENSMUSG00000105594.1	Gm43398	5	143395503	143398244	+	2742	-6.0388	0.0455322	0.763358	0	0	0	0	3.85734	17.4758	0	29.2133	0	0	0	0	3	14	0	27	down
ENSMUSG00000105954.1	Gm42793	5	104435121	104436372	+	1252	-2.94967	0.0232256	0.600707	1.27279	10.6269	35.2446	103.416	57.8601	11.2344	974.276	117.935	2	8	26	100	45	9	2260	109	down
ENSMUSG00000105987.4	AI506816	5	23698296	23712667	-	14372	-1.78398	0.0111561	0.413678	160.371	33.2089	75.9115	193.388	241.726	113.593	673.803	566.955	252	25	56	187	188	91	1563	524	down
ENSMUSG00000106086.1	Gm43352	3	131109026	131112090	-	3065	-6.77957	0.0453266	0.763358	0	0	0	0	82.2899	0	2.15548	0	0	0	0	0	64	0	5	0	down
ENSMUSG00000106099.1	Gm42664	3	119743208	119746446	-	3239	-6.64791	0.0497004	0.784136	0	0	0	0	21.8582	0	0	55.1807	0	0	0	0	17	0	0	51	down
ENSMUSG00000106320.1	Gm42992	5	131986549	131993384	-	6836	-8.43909	0.00398185	0.220452	0	0	0	0	0	0	41.3852	225.051	0	0	0	0	0	0	96	208	down
ENSMUSG00000106627.1	Gm21680	5	25965961	25972663	-	6703	-6.91549	0.0411577	0.740922	0	0	0	0	0	13.731	0	78.9842	0	0	0	0	0	11	0	73	down
ENSMUSG00000107087.1	Gm34411	5	73263429	73268986	+	5558	-6.09294	0.00245431	0.160568	0	0	0	0	7.71467	22.4689	12.5018	9.73777	0	0	0	0	6	18	29	9	down
ENSMUSG00000107159.1	Gm7919	5	93738096	93740783	+	2688	-5.46745	0.00168589	0.125696	0	0	0	7.23911	176.152	7.48963	8.19082	130.919	0	0	0	7	137	6	19	121	down
ENSMUSG00000107169.1	Gm43796	17	24163865	24186287	-	22423	-4.96733	0.0218741	0.588704	20.3646	1.32836	0	0	668.605	0	20.2615	1.08197	32	1	0	0	520	0	47	1	down
ENSMUSG00000107179.1	Gm43069	5	120777796	120805623	+	27828	-25.7148	2.96134e-14	1.1828e-10	0	0	0	0	0	0	2028.74	0	0	0	0	0	0	0	4706	0	down
ENSMUSG00000107182.1	Gm43268	5	53905164	53909218	+	4055	-2.0172	0.0484621	0.775588	15.2735	6.64179	0	12.4099	37.2876	22.4689	31.0389	50.8528	24	5	0	12	29	18	72	47	down
ENSMUSG00000107317.1	Gm19719	5	149282752	149287868	-	5117	-4.936	0.0122629	0.438438	0	0	0	1.03416	21.8582	6.24136	6.46643	4.3279	0	0	0	1	17	5	15	4	down
ENSMUSG00000107379.1	Gm43126	6	127122966	127126155	+	3190	-4.22109	0.0175627	0.533144	9.54591	7.97015	0	0	43.7165	0	84.9258	201.247	15	6	0	0	34	0	197	186	down
ENSMUSG00000107695.1	Gm44289	6	66254743	66258205	+	3463	-7.12454	0.0353831	0.718532	0	0	0	0	38.5734	68.655	0	0	0	0	0	0	30	55	0	0	down
ENSMUSG00000108037.2	Gm44597	6	125039816	125051542	+	11727	-6.84833	0.0104292	0.404137	0	0	0	0	19.2867	0	4.31096	64.9185	0	0	0	0	15	0	10	60	down
ENSMUSG00000108483.1	Gm45184	7	127434422	127439392	+	4971	-24.322	6.58535e-13	1.06612e-09	0	0	0	0	0	0	0	731.415	0	0	0	0	0	0	0	676	down
ENSMUSG00000108484.1	Gm18537	6	83548859	83550381	-	1523	-2.96524	4.77498e-19	1.33504e-14	31.1833	46.4925	52.867	61.0154	315.016	433.15	347.894	388.429	49	35	39	59	245	347	807	359	down
ENSMUSG00000108551.1	Gm20274	7	122995348	122995931	+	584	-5.22598	0.044263	0.75887	0.636394	1.32836	0	0	0	0	12.9329	60.5906	1	1	0	0	0	0	30	56	down
ENSMUSG00000109783.1	Gm45338	16	23520210	23560081	+	39872	-7.6584	8.48278e-06	0.00133242	0	0	0	1.03416	1.28578	93.6204	54.7491	106.034	0	0	0	1	1	75	127	98	down
ENSMUSG00000109885.1	Gm6842	7	7534575	7534964	-	390	-6.08358	0.0354837	0.718842	0	0	0	0	12.8578	0	33.6255	5.40987	0	0	0	0	10	0	78	5	down
ENSMUSG00000109917.1	Gm45671	7	133608226	133616265	+	8040	-6.90121	0.00708043	0.321889	0	0	0	0	15.4293	0	16.8127	59.5086	0	0	0	0	12	0	39	55	down
ENSMUSG00000110079.1	Gm45292	8	91450306	91452512	+	2207	-6.85873	0.0428571	0.751289	0	0	0	0	0	0	24.1414	64.9185	0	0	0	0	0	0	56	60	down
ENSMUSG00000110218.1	Gm20219	17	56551414	56554387	-	2974	-6.63256	0.0108976	0.411076	0	0	0	0	18.0009	0	20.2615	37.8691	0	0	0	0	14	0	47	35	down
ENSMUSG00000110235.1	Gm5086	13	97559971	97583996	+	24026	-21.739	1.36387e-10	7.19478e-08	0	0	0	0	0	109.848	0	0	0	0	0	0	0	88	0	0	down
ENSMUSG00000110689.1	Gm45731	8	104438260	104439462	+	1203	-21.0731	4.96612e-10	1.4109e-07	0	0	0	0	0	0	0	69.2464	0	0	0	0	0	0	0	64	down
ENSMUSG00000110737.1	AC158630.1	10	18796806	18831930	-	35125	-21.5975	1.80049e-10	8.5322e-08	0	0	0	0	0	98.6135	0	0	0	0	0	0	0	79	0	0	down
ENSMUSG00000110824.1	AC133947.1	9	75317072	75342842	-	25771	-1.21218	0.000420284	0.0422504	200.464	178	159.956	134.441	231.44	374.482	440.149	512.856	315	134	118	130	180	300	1021	474	down
ENSMUSG00000110928.1	AC132474.1	9	40363217	40366902	-	3686	-7.06022	0.00932293	0.37505	0	0	0	0	0	17.4758	1.72438	83.3121	0	0	0	0	0	14	4	77	down
ENSMUSG00000111282.1	AC116503.1	9	46239841	46242032	-	2192	-3.6303	0.0388542	0.73717	3.18197	0	4.06669	5.17079	5.14312	0	12.0707	137.411	5	0	3	5	4	0	28	127	down
ENSMUSG00000111654.1	AC127254.1	9	50528767	50533752	+	4986	-5.34891	0.0244092	0.618458	0	0	0	0	3.85734	14.9793	3.87986	8.6558	0	0	0	0	3	12	9	8	down
ENSMUSG00000111689.1	Olfr1082	2	86593412	86598966	-	5555	-7.06631	0.0369175	0.730782	0	0	0	0	69.4321	0	0	33.5412	0	0	0	0	54	0	0	31	down
ENSMUSG00000111703.1	AC121870.1	9	47481628	47486506	-	4879	-2.41924	0.029336	0.672588	38.82	0	5.42225	94.1084	252.013	166.02	147.435	177.444	61	0	4	91	196	133	342	164	down
ENSMUSG00000111815.1	AC107662.1	9	71598835	71600140	-	1306	-1.26922	0.0300512	0.67499	82.0948	179.328	105.734	27.9223	156.865	338.282	223.308	231.543	129	135	78	27	122	271	518	214	down
ENSMUSG00000111902.1	AC158807.1	10	6525883	6526874	-	992	-1.50978	0.0329292	0.701194	8.90952	42.5075	33.8891	13.4441	104.148	43.6895	57.7668	72.4923	14	32	25	13	81	35	134	67	down
ENSMUSG00000112023.1	Lilr4b	10	51480632	51486703	+	6072	-6.0119	0.0221815	0.590757	0	0	0	7.23911	376.733	92.3721	0	0	0	0	0	7	293	74	0	0	down
ENSMUSG00000112148.1	Lilrb4a	10	51490956	51496611	+	5656	-9.31255	0.000924459	0.0788016	0	0	0	0	393.448	94.8687	0	0	0	0	0	0	306	76	0	0	down
ENSMUSG00000112652.1	AC160411.2	10	78428271	78438847	+	10577	-7.67295	0.0018826	0.134618	0	0	0	0	54.0027	89.8756	0	12.9837	0	0	0	0	42	72	0	12	down
ENSMUSG00000112751.1	AC101709.1	10	26949740	26982036	+	32297	-1.24532	0.0357584	0.720117	55.3663	55.791	24.4001	57.9129	77.1467	76.1446	82.7704	223.969	87	42	18	56	60	61	192	207	down
ENSMUSG00000113041.1	CT025556.1	13	75727279	75729162	+	1884	-7.17192	0.0334048	0.707014	0	0	0	0	0	59.9171	0	50.8528	0	0	0	0	0	48	0	47	down
ENSMUSG00000113536.1	CT030170.4	12	17933164	17939628	+	6465	-3.15821	0.0370893	0.730782	1.90918	2.65672	12.2001	1.03416	11.572	0	79.3216	64.9185	3	2	9	1	9	0	184	60	down
ENSMUSG00000113592.1	CT033799.2	12	18332873	18339043	+	6171	-6.17725	0.0265063	0.643866	0	0	0	0	21.8582	0	9.9152	23.8034	0	0	0	0	17	0	23	22	down
ENSMUSG00000113683.1	CT030159.2	13	64361052	64363022	+	1971	-3.95875	0.0318789	0.689882	0	10.6269	4.06669	0	0	84.8825	68.5442	70.3284	0	8	3	0	0	68	159	65	down
ENSMUSG00000114150.1	AC132954.5	12	83823455	83842087	+	18633	-1.47821	0.0386955	0.737115	71.2761	11.9552	20.3334	51.7079	109.291	136.062	143.124	47.6069	112	9	15	50	85	109	332	44	down
ENSMUSG00000114357.1	AC158983.1	14	65351442	65359410	-	7969	-4.57043	0.0162928	0.515891	0	2.65672	0	0	6.4289	28.7103	6.03534	14.0657	0	2	0	0	5	23	14	13	down
ENSMUSG00000114401.1	CT025642.1	13	78123379	78183168	-	59790	-6.3982	0.0179074	0.533804	0	0	0	0	18.0009	0	33.6255	12.9837	0	0	0	0	14	0	78	12	down
ENSMUSG00000114438.1	AC154767.2	13	112669139	112685696	-	16558	-7.1982	0.00624708	0.29755	0	0	0	0	21.8582	82.3859	0	8.6558	0	0	0	0	17	66	0	8	down
ENSMUSG00000114532.1	CT025547.1	14	8367440	8371010	+	3571	-5.90639	0.0462055	0.767137	0	0	0	0	21.8582	19.9724	4.31096	0	0	0	0	0	17	16	10	0	down
ENSMUSG00000114605.1	AC154548.1	13	78112482	78116319	+	3838	-7.51084	3.12597e-05	0.00448989	0	0	0	0	77.1467	6.24136	14.6573	42.197	0	0	0	0	60	5	34	39	down
ENSMUSG00000114608.1	AC238811.2	13	120010390	120018931	+	8542	-23.2372	1.20286e-16	1.12103e-12	0	0	0	0	59.1458	505.55	0	0	0	0	0	0	46	405	0	0	down
ENSMUSG00000114707.1	CT010486.2	13	114281668	114284381	-	2714	-6.00253	0.03748	0.730958	0	0	0	0	28.2871	0	13.364	7.57382	0	0	0	0	22	0	31	7	down
